# Supplementary material for: Pre-emptive oral cholera vaccine (OCV) mass vaccination campaign in Cuamba District, Niassa Province, Mozambique: feasibility, vaccination coverage and delivery costs using CholTool
Source: PubMed Central journal article supplement — BMJ Open. 2022 Sep 7;12(9):e053585. doi: 10.1136/bmjopen-2021-053585 (PMC9454037; doi:10.1136/bmjopen-2021-053585), 2022-09-07
Supplement: bmjopen-2021-053585.draft_revisions.pdf [file bmjopen-2021-053585.draft_revisions.pdf]

# BMJ Open

BMJ Open is committed to open peer review. As part of this commitment we make the peer review history of every article we publish publicly available.

When an article is published we post the peer reviewers' comments and the authors' responses online. We also post the versions of the paper that were used during peer review. These are the versions that the peer review comments apply to.

The versions of the paper that follow are the versions that were submitted during the peer review process. They are not the versions of record or the final published versions. They should not be cited or distributed as the published version of this manuscript.

BMJ Open is an open access journal and the full, final, typeset and author-corrected version of record of the manuscript is available on our site with no access controls, subscription charges or pay-per-view fees (<http://bmjopen.bmj.com>).

If you have any questions on BMJ Open's open peer review process please email [info.bmjopen@bmj.com](mailto:info.bmjopen@bmj.com)

# BMJ Open

## A pre-emptive Oral Cholera Vaccine (OCV) mass vaccination campaign in Cuamba District, Niassa Province, Mozambique: feasibility, costs and vaccine coverage

|                               |                                                                                                                                                                                                                                                                                                                                                                                                                                                                                                                                                                                                                                                                                                                                                                                                                                                           |
|-------------------------------|-----------------------------------------------------------------------------------------------------------------------------------------------------------------------------------------------------------------------------------------------------------------------------------------------------------------------------------------------------------------------------------------------------------------------------------------------------------------------------------------------------------------------------------------------------------------------------------------------------------------------------------------------------------------------------------------------------------------------------------------------------------------------------------------------------------------------------------------------------------|
| Journal:                      | <i>BMJ Open</i>                                                                                                                                                                                                                                                                                                                                                                                                                                                                                                                                                                                                                                                                                                                                                                                                                                           |
| Manuscript ID                 | bmjopen-2021-053585                                                                                                                                                                                                                                                                                                                                                                                                                                                                                                                                                                                                                                                                                                                                                                                                                                       |
| Article Type:                 | Original research                                                                                                                                                                                                                                                                                                                                                                                                                                                                                                                                                                                                                                                                                                                                                                                                                                         |
| Date Submitted by the Author: | 20-May-2021                                                                                                                                                                                                                                                                                                                                                                                                                                                                                                                                                                                                                                                                                                                                                                                                                                               |
| Complete List of Authors:     | Elias Chitio, Jucunú J.; National Institute of Health Baltazar, Cynthia; National Institute of Health Langa, José Paulo; National Institute of Health Baloi, Liliana Dengo; National Institute of Health Manuel, José Alberto; Provincial Directorate of Health Mboane, Ramos B. J.; Provincial Directorate of Health Assane, Sadate; Provincial Directorate of Health Omar, Alide; District Health Directorate Manso, Mariana; District Health Directorate Capitine, Igor; National Institute of Health Luiz, Naira; National Institute of Health; International Vaccine Institute Mogasale, Vittal; International Vaccine Institute, Policy and Economic Research Marks, Florian ; International Vaccine Institute Park, Se Eun; International Vaccine Institute; Yonsei University Beck, Namseon; International Vaccine Institute; Medair Headquarters |
| Keywords:                     | PUBLIC HEALTH, HEALTH ECONOMICS, INFECTIOUS DISEASES, Paediatric infectious disease & immunisation < PAEDIATRICS                                                                                                                                                                                                                                                                                                                                                                                                                                                                                                                                                                                                                                                                                                                                          |
|                               |                                                                                                                                                                                                                                                                                                                                                                                                                                                                                                                                                                                                                                                                                                                                                                                                                                                           |

SCHOLARONE™  
Manuscripts

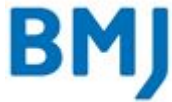

I, the Submitting Author has the right to grant and does grant on behalf of all authors of the Work (as defined in the below author licence), an exclusive licence and/or a non-exclusive licence for contributions from authors who are: i) UK Crown employees; ii) where BMJ has agreed a CC-BY licence shall apply, and/or iii) in accordance with the terms applicable for US Federal Government officers or employees acting as part of their official duties; on a worldwide, perpetual, irrevocable, royalty-free basis to BMJ Publishing Group Ltd ("BMJ") its licensees and where the relevant Journal is co-owned by BMJ to the co-owners of the Journal, to publish the Work in this journal and any other BMJ products and to exploit all rights, as set out in our [licence](#).

The Submitting Author accepts and understands that any supply made under these terms is made by BMJ to the Submitting Author unless you are acting as an employee on behalf of your employer or a postgraduate student of an affiliated institution which is paying any applicable article publishing charge ("APC") for Open Access articles. Where the Submitting Author wishes to make the Work available on an Open Access basis (and intends to pay the relevant APC), the terms of reuse of such Open Access shall be governed by a Creative Commons licence – details of these licences and which [Creative Commons](#) licence will apply to this Work are set out in our licence referred to above.

Other than as permitted in any relevant BMJ Author's Self Archiving Policies, I confirm this Work has not been accepted for publication elsewhere, is not being considered for publication elsewhere and does not duplicate material already published. I confirm all authors consent to publication of this Work and authorise the granting of this licence.

1  
2  
3 **1 A pre-emptive Oral Cholera Vaccine (OCV) mass vaccination campaign in Cuamba District, Niassa**  
4  
5 **2 Province, Mozambique: feasibility, costs and vaccine coverage**  
6

7  
8  
9  
10  
11  
12  
13  
14  
15  
16  
17  
18  
19  
20  
21  
22  
23  
24  
25  
26  
27  
28  
29  
30  
31  
32  
33  
34  
35  
36  
37  
38  
39  
40  
41  
42  
43  
44  
45  
46  
47  
48  
49  
50  
51  
52  
53  
54  
55  
56  
57  
58  
59  
60

4 Jucunú J. Elias Chitio<sup>1</sup>, Cynthia Semá Baltazar<sup>1</sup>, José Paulo Langa<sup>1</sup>, Liliana Dengo Baloi<sup>1</sup>, José Alberto  
5 Manuel<sup>2</sup>, Ramos B. J. Mboane<sup>2</sup>, Sadate Assane<sup>2</sup>, Alide Omar<sup>3</sup>, Mariana Manso<sup>3</sup>, Igor Capatine<sup>1</sup>, Naira  
6 Luiz<sup>1,4</sup>, Vittal Mogasale<sup>4</sup>, Florian Marks<sup>4,5</sup>, Se Eun Park<sup>4,6,#</sup> and Namseon Beck<sup>4,7</sup>

8 <sup>1</sup> National Institute of Health, Maputo, Mozambique

9 <sup>2</sup> Provincial Health Directorate, Niassa, Mozambique

10 <sup>3</sup> District Health Directorate, Cuamba, Mozambique

11 <sup>4</sup> International Vaccine Institute, SNU Research Park, 1 Gwanak-ro, 1 Gwanak-gu, Seoul, 08826,  
12 Republic of Korea

13 <sup>5</sup> The Department of Medicine, The University of Cambridge, United Kingdom

14 <sup>6</sup> Graduate School of Public Health, Yonsei University, 50 Yonsei-ro, Seodaemun-gu, Seoul, 03722,  
15 Republic of Korea

16 <sup>7</sup> MEDAIR, Switzerland

18 # Corresponding author:

19 Se Eun Park, PhD; International Vaccine Institute, 1 Gwanak-ro, 1 Gwanak-gu, Seoul, 151-742; Republic  
20 of Korea; T: +82-2-881-1154; Email: SeEun.Park@ivi.int

1  
2  
3 **22 Abstract**  
4  
5  
6 **23**  
7  
8 **24 Objectives:** To evaluate the feasibility and costs of vaccination and vaccine coverage of a pre-emptive  
9  
10 **25** Oral Cholera Vaccine (OCV) mass vaccination campaign in a rural, remote, and cholera endemic setting  
11  
12 **26** in Cuamba District, Mozambique, generating evidence to guide future vaccination campaigns in similar  
13  
14 **27** settings.  
15  
16 **28**

17  
18 **29 Design:** World Health Organization (WHO) prequalified OCV (Euvichol-Plus), a killed whole-cell  
19  
20 **30** bivalent vaccine containing *Vibrio cholerae* O1 (classical and El Tor) and O139, administered in two-  
21  
22 **31** doses with a 15-day interval in August 7-11 and August 27-31, 2018. Microplanning and community  
23  
24 **32** sensitization conducted prior to the campaign. Vaccine coverage rates and feasibility measured through  
25  
26 **33** coverage survey and vaccination registry, and vaccination costs using CholTool.  
27  
28  
29  
30

31 **35 Setting:** Cuamba District located in Niassa province of Mozambique.  
32  
33 **36**

34  
35 **37 Participants:** Approximately 180,000 people aged above one year living in Cuamba District targeted for  
36  
37 **38** vaccination. Households in vaccination target area randomly selected for vaccine coverage survey.  
38  
39  
40

41 **40 Primary and secondary outcome measures:** Vaccine coverage estimates and costs of OCV mass  
42  
43 **41** vaccination campaign evaluated as primary outcome. Feasibility and barriers of vaccination measured as  
44  
45 **42** secondary outcome.  
46  
47  
48

49  
50 **44 Results:** Administrative vaccine coverage of the first and second rounds of campaign were 98.9%  
51  
52 **45** (194,581) and 98.8% (194,325) respectively. Coverage survey exhibited 75.9% ( $\pm 2.2\%$ ) and 68.5%  
53  
54 **46** ( $\pm 3.3\%$ ) vaccine coverages for the first and second rounds, respectively. Overall, 60.4% ( $\pm 3.4\%$ ) of the  
55  
56 **47** target population received full two-doses of OCV. No severe adverse events following immunization  
57  
58  
59

1  
2  
3 48 were notified. Financial cost per dose delivered was US\$0.60 without vaccine cost and US\$1.98 including  
4  
5 49 vaccine costs.  
6

7 50  
8  
9 51 **Conclusion:** The introduction of a pre-emptive OCV mass vaccination campaign in rural cholera endemic  
10  
11 52 setting in Mozambique was technically and programmatically feasible with reasonable full-dose vaccine  
12  
13 53 coverage to confer sufficient herd immunity for at least the next three to five years. The vaccination cost  
14  
15 54 estimate indicates affordability of OCV vaccination campaign, comparable to Gavi's operational support  
16  
17 55 for vaccination.  
18  
19

20 56  
21  
22 57 **Key words:** Cholera, OCV, pre-emptive vaccination, Cuamba, Mozambique, coverage survey,  
23  
24 58 feasibility, vaccination cost  
25  
26  
27  
28  
29  
30  
31  
32  
33  
34  
35  
36  
37  
38  
39  
40  
41  
42  
43  
44  
45  
46  
47  
48  
49  
50  
51  
52  
53  
54  
55  
56  
57  
58  
59  
60

### 59 **Strengths and limitations of this study**

- 60 • This pre-emptive OCV mass vaccination campaign conducted in Cuamba District is the first and only  
61 OCV (Euvichol-Plus) vaccination conducted in the Niassa Province of Mozambique until the date of  
62 this manuscript submission, demonstrating its feasibility and acceptability in rural and remote setting  
63 in Mozambique.
- 64 • Randomized survey of households in the community documented vaccine coverage in the target  
65 population.
- 66 • Evaluation of barriers to OCV vaccination were communicated by the target population and  
67 documented through the community survey.
- 68 • Community survey identified effective communication strategies for community engagement and  
69 sensitization for each round of the OCV mass vaccination campaigns.
- 70 • Costs associated with conducting a mass vaccination campaign using a two-dose OCV (Euvichol-  
71 Plus) documented through retrospective data collection and analysis.

### 73 **Introduction**

74 Cholera is a vaccine preventable disease that remains as a major public health concern in many parts of  
75 low- and middle-income countries (LMICs). A comprehensive policy measure is warranted to control and  
76 prevent cholera including investments in improving infrastructure and knowledge, attitude, and behavior  
77 associated with water, sanitation, and hygiene (WaSH), strengthening health system, and adequate use of  
78 oral cholera vaccine (OCV) (1). In Mozambique, cholera has been endemic since the early 1970's when  
79 the first cholera outbreak was reported in the country. Several epidemics followed since then including  
80 the outbreaks in 1997-1999 and 2012-2016 (2, 3). Cholera outbreaks are more frequent in the country's  
81 northern provinces including Nampula, Cabo Delgado, Tete, and Niassa (4). Following the reinforcement  
82 of cholera outbreak response strategies, the Ministry of Health (MOH) of Mozambique has carried out  
83 several OCV mass vaccination campaigns, as recommended by the World Health Organization (WHO) as

1  
2  
3 84 an integral part of a comprehensive strategy for cholera prevention and control in endemic setting along  
4  
5 85 with primary interventions of WaSH measures (5): Recent cholera outbreaks in these cholera endemic and  
6  
7 86 hotspot areas in December 2015 resulted in the use of global OCV emergency stockpile to vaccinate  
8  
9 87 approximately 212,745 people living in six neighborhoods of Nampula city in 2016 (4); and in April  
10  
11 88 2017, another 709,077 doses from the stockpile to vaccinate approximately 354,550 people in Tete City  
12  
13 89 and Moatize and Mutarara districts, in response to the cholera outbreak with over 3,592 cholera cases.  
14  
15  
16 90

17  
18 91 In addition to these reactive vaccination campaigns supported by the WHO International Coordinating  
19  
20 92 Group (ICG) on vaccine provision for cholera, a growing need for a preventive public health intervention  
21  
22 93 using a targeted vaccination approach in cholera priority areas in-country was identified. The past records  
23  
24 94 of numerous episodes of cholera epidemics in Mozambique have spotted at-risk districts in the most  
25  
26 95 cholera endemic provinces such as Nampula (particularly Nampula City), Niassa (Lichinga city and  
27  
28 96 Cuamba and Lago Districts), and Cabo Delgado (Pemba City and Ancuabe District), and to a lesser  
29  
30 97 degree, other provinces and districts with limited sanitary conditions (5). Niassa province, one of the  
31  
32 98 cholera endemic regions with annual cholera outbreaks affecting largely the Lichinga City and Lago and  
33  
34 99 Cuamba Districts, was identified for a planned pre-emptive vaccine introduction to prevent subsequent  
35  
36 100 cholera outbreaks. Cuamba District with an estimated population of 264,572 (6), reports over 200  
37  
38 101 suspected cholera and 2,000 diarrheal cases almost every year, with an exception of 2014 and 2016 (7).  
39  
40 102 Here, we describe the feasibility, costs, and coverage estimates associated with a pre-emptive OCV mass  
41  
42 103 vaccination campaign conducted in Cuamba District using two-dose OCVs (Euvichol-Plus) administered  
43  
44 104 to approximately 180,000 people with a 15-day interval between the doses, as well as challenges of  
45  
46 105 delivering healthcare in resource limited rural setting in Mozambique.  
47  
48  
49 106

## 51 107 **Methods**

### 52 108 53 54 109 *Study site and population*



1  
2  
3 110 The Cuamba District is located in Niassa Province with a population size of around 264,572 (6). The site  
4  
5 111 was selected for a pre-emptive OCV mass vaccination campaign as the district includes the Cuamba  
6  
7 112 Municipality area where cholera is found to be endemic with periodic outbreaks. The area was also  
8  
9 113 highlighted by the WHO as one of the priority sites to consider for a potential OCV intervention during a  
10  
11 114 needs-assessment performed in September 2015 (1). The District of Cuamba is composed of a total 36  
12  
13 115 bairros and povoados with population size of approximately 264,572 (6), which includes 21 bairros in the  
14  
15 116 Cuamba Municipality area with around 137,640 residents (8). In total, approximately 180,000 individuals  
16  
17 117 living in Cuamba District was targeted initially, and ultimately around 196,652 people living in Cuamba  
18  
19 118 District were targeted, which included 20 Bairros in the Municipality area and 10 Povoados in the  
20  
21 119 outskirts of the Municipality area (Figure 1). Selection of bairros and povoados in the outskirts of  
22  
23 120 Cuamba Municipality within the District was made not only based on the high number of doses destined  
24  
25 121 for the target population in the municipality area, but also the records of cholera cases during the  
26  
27 122 outbreaks. Everyone above one year of age were eligible for the two-dose OCV administration.  
28  
29  
30  
31  
32

### 33 124 ***Vaccine delivery, storage, and handling***

34  
35 125 Approximately 360,000 doses of WHO pre-qualified Euvichol-Plus, a killed whole-cell bivalent OCV  
36  
37 126 containing *Vibrio cholerae* O1 (classical and El Tor) and O139, were procured from the manufacturer  
38  
39 127 (EuBiologics) and shipped to the entry port in Pemba, Mozambique in cold-chain. Upon arrival in  
40  
41 128 Mozambique, the vaccines were delivered to Lichinga by airfreight and transported to a central vaccine  
42  
43 129 storage room in Cuamba project site, and kept in refrigerators with temperature maintained within range  
44  
45 130 between 2-8°C until and throughout the campaign. The vaccine vial monitor (VVM) and electronic  
46  
47 131 shipping indicators (Q-Tag) were used to monitor the temperature of the vaccines during delivery,  
48  
49 132 storage, and handling. During the vaccination campaign, cool boxes with dry ice maintained within 2-8°C  
50  
51  
52 133 were used to carry the vaccines to the vaccination posts.  
53  
54  
55  
56  
57  
58  
59  
60

### 135 ***Cost of vaccine delivery***

136 An openly available, standardized and validated Excel-based tool known as the CholTool was used for  
137 estimating vaccine delivery costs (9). This tool comprehensively estimates programmatic costs such as  
138 microplanning, communication and training materials development, sensitization/social mobilization, and  
139 personnel training, as well as costs related to vaccine delivery such as vaccine procurement, handling,  
140 storage, and transport, vaccination administration, monitoring supervision, and field support. The  
141 CholTool has the ability to estimate both financial and economic costs. Financial costs refer to the  
142 monetary costs to the payer (e.g. allowances, supplies, transport and resources used in micro-planning,  
143 training, and sensitization/social mobilization) while economic costs include financial costs along with  
144 non-monetary costs of donated goods and resources already available (e.g., health personnel time).  
145 Key informant interviews were conducted at various administrative levels before, during and after the  
146 vaccination campaign in order to identify the resources necessary for each vaccination related activity and  
147 costs of respective resources for each of the two rounds of vaccination. The resource and cost data were  
148 entered in CholTool which auto-calculates OCV delivery costs. The costs were reported in 2018 in United  
149 States Dollars (US\$) based on government and payer perspective.

150

### 151 ***Vaccination Strategy and microplanning***

152 A fixed-post vaccination strategy with additional mobile teams was adapted for the microplanning of the  
153 vaccination campaign. The vaccination teams for 15 fixed posts (healthcare facilities) and 33 mobile  
154 teams were identified and trained prior to the campaign. This adopted mixed vaccination strategy aimed  
155 to improve quality, accessibility, and coverage. Each post was staffed with around 5 field workers  
156 including 2 health workers and 3 community engagement workers. Five days prior to the vaccination  
157 campaign, micro-plans for each cluster were prepared with postal addresses, target populations,  
158 vaccination dates, teams, and other site-specific resources. The health workers obtained verbal informed  
159 consents from the individuals visiting the vaccination posts for the OCV administration. Pregnant women  
160 by self-report or infants below one year old were excluded from the vaccination. Vaccination cards and

1  
2  
3 161 vaccination registry book were developed and deployed, specific to this vaccination that included  
4  
5 162 variables such as name, age, address, and vaccination date. The collected data in the vaccine registry book  
6  
7 163 were entered in an excel-based database. The number of doses planned and administered were also  
8  
9 164 recorded daily for each round of the vaccination campaign.  
10

11 165

### 14 166 *Vaccination, adverse event monitoring, and coverage estimate*

16 167 The vaccination campaign occurred in two rounds with a 15-day interval. The first round took place  
17  
18 168 during August 7-11, followed by the second round during August 27–31, 2018. Provision was made for  
19  
20 169 mop-up activities after the second round for those who missed the second dose. To detect any possible  
21  
22 170 adverse events following immunization (AEFI) during and after the campaign, health workers were  
23  
24 171 trained to monitor and notify any adverse events encountered in inpatient and outpatient admissions at  
25  
26 172 Cuamba health facilities from the first day of each round throughout the 15 days after the last day of each  
27  
28 173 round. Coverage estimates were assessed in two-folds; administrative coverage and community vaccine  
29  
30 174 coverage surveys. Community vaccine coverage surveys included daily monitoring of vaccine coverage  
31  
32 175 in relations to vaccine dose usage, conducted during each rounds of the campaign, and a final coverage  
33  
34 176 survey conducted following the completion of the second-round campaign to measure the vaccine  
35  
36 177 coverage of two full doses of OCV administration.  
37

38 178

41 179 The vaccine coverage survey was carried out by a team composed of 16 interviewers distributed across 5  
42  
43 180 teams. Each team conducted 26 interviews daily, totaling 572 instead of 650 for the 5 days of the first  
44  
45 181 phase of the campaign, as some data were excluded due to inconsistency. For the second phase of the  
46  
47 182 coverage survey, 714 households were visited and interviewed for the final coverage monitoring and  
48  
49 183 evaluation survey. Performance of the vaccination campaign was monitored through daily surveys using  
50  
51 184 questionnaires to collect daily information on vaccine coverage, barriers against OCV, and source of  
52  
53 185 information on the campaign. The survey results were communicated to the vaccination campaign field  
54  
55 186 teams and the local government officials in real-time, allowing them to refine the outreach strategies  
56  
57  
58  
59  
60

1  
2  
3 187 during the campaign. For both the daily monitoring and final coverage surveys, a two-stage cluster  
4  
5 188 random sampling was used, where each cluster (primary sampling unit) was selected from the list of  
6  
7 189 villages in the Health Zones, according to the Probability Proportional to Population Size (PPS), and  
8  
9 190 households (secondary sampling unit) were chosen by segmentation of the sectors resulting in maximum  
10  
11 191 15 households, followed by numbering of households and random selection to start the survey interviews.  
12  
13 192 The final vaccine coverage was also calculated after converting the daily coverages to that of the final day  
14  
15 193 by multiplying the ratio of the final vaccine consumption to that of each day, based on an assumption that  
16  
17 194 vaccine coverage is linearly correlated with vaccine use. For each variable, the prevalence was estimated  
18  
19 195 with 95% confidence interval.  
20  
21  
22 196

#### 23 24 197 ***Ethics statement***

25  
26 198 The vaccination campaign was conducted as a part of the government's public health intervention,  
27  
28 199 approved by the Ministry of Health. Institutional Ethical Committee of the National Institute of Health  
29  
30 200 (Ref: 116/CNBS/19) and ethical review board of the International Vaccine Institute, Seoul, Korea (IRB  
31  
32 201 number 2017-006) approved the study protocol for the OCV mass vaccination campaign monitoring and  
33  
34 202 coverage survey. Oral informed consent was obtained from eligible participants. For children, consents  
35  
36 203 were obtained from parents/guardian and all adult participants provided their own consent. The study did  
37  
38 204 not present any risk of harm to subjects. No biological samples were collected. Minimum data was  
39  
40 205 collected from participants, whereby privacy and confidentiality of the data were ensured during the  
41  
42 206 survey implementation and data entry and management.  
43  
44

45 207

#### 46 47 208 ***Patient and public involvement***

48  
49 209 The participants in this study were people living in the cholera endemic and hotspot area, targeted for  
50  
51 210 OCV vaccination campaign as an integral part of the government's cholera prevention efforts. The  
52  
53 211 vaccination target population living in Cuamba District were sensitized and engaged, prior to and during  
54  
55 212 the vaccination campaign, by the district and provincial health officials, study team that included the  
56  
57  
58  
59

1  
2  
3 213 Ministry of Health and National Institute of Health government officials, and local public health  
4  
5 214 professionals at healthcare facilities. The participants were provided with information on the planned  
6  
7 215 OCV mass vaccination such as the purpose of pre-emptive vaccination and detailed information on where  
8  
9 216 and when the vaccination campaigns were to take place. The vaccination campaign was also announced  
10  
11 217 through various press and social media in Mozambique for public awareness and involvement. The study  
12  
13 218 was conducted in a transparent manner with open communication and information sharing in the  
14  
15 219 community, and participants to the OCV vaccination and vaccine coverage survey were informed for oral  
16  
17 220 consent. Stakeholder meetings were also conducted prior to, during, and after the vaccination campaign to  
18  
19 221 further disseminate the campaign plan and results to the community members.  
20  
21  
22 222

## 23 24 223 **Results**

### 25 26 224 *OCV vaccine coverage*

27  
28 225 The administrative coverage of the first and the second rounds of the campaign were 98.9% (194,581) and  
29  
30 226 98.8% (194,325) respectively based on the available census data of vaccination target population in  
31  
32 227 Cuamba Municipality and outskirts, estimated at around 196,652 (6) inhabitants (Table 1a). A total of  
33  
34 228 194,581 people over one-year-old received the first dose, out of whom 99,275 were females and 122,592  
35  
36 229 were children aged less than 15 years. For the second round, total 194,325 people were vaccinated,  
37  
38 230 including 99,275 females and 120,169 children less than 15 years old. Notably, the vaccine coverage  
39  
40 231 survey conducted in the target community during each round and post-vaccination exhibited an  
41  
42 232 approximate coverage estimates of 75.9% (95 CI, 78.10 - 73.70%) for the first round and 68.5% (71.80 -  
43  
44 233 65.20%) for the second round. The coverage rate for the full two-doses was estimated at 60.4% (63.80 -  
45  
46 234 57.00%), whereby the coverage of children aged 1-5 years was around 64.4 % (57.10 – 71.10%) (Table  
47  
48 235 1b). No adverse events were reported during and after the vaccination activities, monitored up to 14 days  
49  
50 236 post-vaccination campaign.  
51  
52  
53  
54 237

### 55 56 238 *Source of Information and Acceptability*

57  
58  
59  
60

1  
2  
3 239 The source of information on the OCV vaccination campaign, identified by the populations living in the  
4  
5 240 vaccination target areas, showed use of megaphone as the most effective tool in disseminating  
6  
7 241 information on the vaccination plan and mobilizing the community to get immunized for both rounds:  
8  
9 242 24% and 34% at the first and second rounds respectively (Table 2). Around 15% of the surveyed people  
10  
11 243 in the target community indicated that they have learnt about the vaccination campaign through radio  
12  
13 244 broadcast for the first round, but its communication impact reduced in the second round (4%). This was  
14  
15 245 different for the community leaders, whose contribution increased from 5% in the first round to 19% in  
16  
17 246 the following round, reflecting their active engagement and communication efforts in close coordination  
18  
19 247 with the vaccination teams on the ground.  
20  
21

22 248

### 24 249 ***Reasons for not being vaccinated***

25  
26 250 The unavailability (absence) of the target population for vaccination and incompatibility between working  
27  
28 251 hours and campaign schedule were commonly cited as barriers for vaccination in both the first (35%) and  
29  
30 252 the second round (51%) (Table 3). Absence of vaccinators at the vaccination sites were also mentioned,  
31  
32 253 12% and 18% for the first and second round respectively, despite the pre-vaccination planning and  
33  
34 254 programmatic organization. Notably, around 10% of the target population has indicated that they have not  
35  
36 255 been informed about the vaccination campaign even in the second round, though this was a reduction  
37  
38 256 compared to 18% in the first round. In order to address the most common barriers identified in the first  
39  
40 257 round, the second round of the vaccination campaign was further extended for additional few days  
41  
42 258 including the weekends, enabling more people to get vaccinated.  
43  
44

45 259

### 47 260 ***OCV delivery costs***

48  
49 261 The total financial cost of campaign was US\$768,904 of which vaccine acquisition including vaccine  
50  
51 262 shipment constituted 69% (US\$533,659) (Table 4). The vaccine delivery costs including, microplanning,  
52  
53 263 training, communication, and social mobilization, vaccination implementation (Round 1 & 2) constituted  
54  
55 264 rest 31% (US\$235,245). The total financial cost per dose delivered was US\$0.60 without the vaccine cost  
56  
57  
58  
59

1  
2  
3 265 and US\$1.98 including the vaccine costs in 2018 price. The economic cost per dose delivered excluding  
4  
5 266 vaccine costs was five times higher at US\$3.02. The total financial cost of delivery per fully immunized  
6  
7 267 person excluding vaccine costs was US\$1.21.  
8

9 268

## 11 269 **Conclusion**

13 270 The OCV campaign in Cuamba District was organized without major logistical and programmatic  
14  
15 271 challenges, and no adverse events were reported throughout the vaccination activities and up to 14 days  
16  
17 272 after the campaign. Despite the similarity in the number of people vaccinated in the first and second  
18  
19 273 rounds, the vaccine coverage survey of the second round showed lower coverage estimates than the first  
20  
21 274 round. This may be due to possible cross border movement of people from untargeted districts to get  
22  
23 275 vaccination during the second round. The vaccine coverage for the full two-doses was over 60% that may  
24  
25 276 confer sufficient herd immunity for the following several years based on the existing literature on a  
26  
27 277 cholera transmission model using the Matlab data from Bangladesh (10,11), which predicted 50%  
28  
29 278 coverage with OCV in cholera endemic areas may result in 89% reduction in cholera cases in  
30  
31 279 unvaccinated (12).  
32  
33

34 280

35  
36  
37 281 In our study, children aged 5-14 years exhibited the highest coverage. This may be due to the vaccination  
38  
39 282 posts in both schools (fixed vaccination post) and near homes (mobile vaccination posts), which  
40  
41 283 facilitated the school-aged children to access the immunization health service more easily. The female  
42  
43 284 group also presented higher vaccine coverage rate compared to the male group, likely associated with  
44  
45 285 their routine boundaries of livelihood near their houses or their child/children's schools as they take care  
46  
47 286 of children while the male group typically work outside. This assumption is supported by the fact that the  
48  
49 287 absence during the campaign was identified as a significant barrier against vaccination during both rounds  
50  
51 288 of the campaign. Similar pattern was consistently prevalent in the previous OCV campaigns in Beira (13)  
52  
53 289 and Nampula (4), whereby absence was the main barrier for vaccination. The second round of the  
54  
55 290 campaign coincided with the period of school holidays when most households move to farming and food  
56  
57  
58  
59  
60

1  
2  
3 291 production, resulting in higher absence rate in the second round (43.0%) than in first round (17.0%).  
4  
5 292 Further, it is encouraging to observe more than 60% vaccine coverage rate among children aged 1-4  
6  
7 293 years, the most at-risk population age-group concerning cholera outbreaks. Considering that caregivers  
8  
9 294 for these younger children are mostly women, higher vaccine coverage for these toddlers and younger  
10  
11 295 children and women is as anticipated in accordance with other studies published in similar settings (14).  
12  
13  
14 296

15  
16 297 In order to enhance the vaccine coverage, it is paramount to better understand the effective means of  
17  
18 298 communications for community sensitization and engagements, as well as barriers towards participating  
19  
20 299 in a vaccination program such as this campaign. Here, we showed that the use of megaphone proved to be  
21  
22 300 the most effective advocacy tool for disseminating information on the vaccination to our target  
23  
24 301 community, which may have allowed the field workers to reach out to families without access to other  
25  
26 302 sources of information. For those with missed opportunities to receive the OCV doses during the two  
27  
28 303 rounds, a mop-up vaccination can be considered, though it is often more laborious and costly, requiring a  
29  
30 304 complex management (13). Further, informing the public on the availability of a mop-up prior to or  
31  
32 305 during the campaign may negatively affect their participation in the regular vaccination schedule set-up.  
33  
34 306 Hence, a mop-up was not considered after the first round in our approach, but pursued after the second  
35  
36 307 round in order to enhance the full two-dose vaccination and verify vaccination data records submitted  
37  
38 308 during the regular program. Approximately 15.4% (32,775/212,824) of the delivered second doses were  
39  
40 309 through this mop-up campaign indicative of an effective strategy.  
41  
42  
43 310

44  
45 311 The financial costs of OCV delivery per fully immunized person in this campaign was lower than delivery  
46  
47 312 costs reported in other African countries using the same CholTool (US\$1.8 in Shashemene district of  
48  
49 313 Ethiopia; US\$2.5 in Nsanje district of Malawi; and US\$3.5 in Machinga, Phalombe, and Zomba districts  
50  
51 314 of Malawi per the US\$ price value of 2016), but closer to that reported in Puri district of India (US\$1.14  
52  
53 315 per the US\$ price value of 2016) (9). One reason could be that Mozambique has experience of conducting  
54  
55 316 several OCV campaigns in recent years, and hence there were already resources and expertise available  
56  
57  
58  
59  
60



1  
2  
3 317 for micro-planning, communication, sensitization, trainings etc., which might have reduced the costs  
4  
5 318 associated with introduction of vaccines in comparison to a vaccination programs in naïve setting. The  
6  
7 319 financial cost of US\$0.60 per dose delivered (excluding vaccine procurement) is comparable to the  
8  
9 320 operational support ranging between US\$0.30 and US\$0.80 per person targeted for vaccination  
10  
11 321 campaigns, recommended by the Gavi, the Vaccine Alliance (15,16). This indicates the affordability of  
12  
13 322 OCV campaign in the current setting.  
14

15  
16 323  
17  
18 324 Overall, our study proved the feasibility of conducting a preemptive OCV mass vaccination campaign in a  
19  
20 325 rural and semi-rural setting in Cuamba District and Cuamba Municipality areas respectively, with  
21  
22 326 sufficient coverage rate and relatively lower delivery cost. The success of vaccination was a result of  
23  
24 327 effective coordination and microplanning among stakeholders despite some field challenges. The  
25  
26 328 vaccination strategy utilizing both fixed and mobile posts, as well as the daily feedback to the  
27  
28 329 coordination team on the preliminary coverage survey result and data related to barriers and source of  
29  
30 330 information on the vaccination campaign, proved valuable to prospectively refine the campaign and  
31  
32 331 mobilization strategy every day on a real-time basis.  
33

34  
35 332  
36  
37 333 However, there are several limitations. First, the operational challenges concerning poor road conditions  
38  
39 334 resulted in the accessibility to the target area difficult. Second, the programmatic support that required  
40  
41 335 sufficient and trained human resources and budget for a sustained field monitoring activity and close on-  
42  
43 336 site supervision prior to and during the vaccination campaign and coverage survey activities. Third, the  
44  
45 337 differences in the coverage rates of administrative data and survey result are due to the lack of accurate  
46  
47 338 up-to-date census data of local population. In addition, in order to avoid any conflict with the measles and  
48  
49 339 rubella national immunization campaign that was taking place across the country at the time of this  
50  
51 340 vaccination campaign, we had to delay our OCV vaccination campaign for about two months to obtain  
52  
53 341 support from immunization-related stakeholders, particularly the expanded programme of immunization  
54  
55  
56  
57  
58  
59  
60

1  
2  
3 342 (EPI) for cold chain space and logistics. Any mass vaccination campaigns should also consider  
4  
5 343 seasonality and other major community activities and/or any political issues.  
6

7 344

### 9 345 **Acknowledgements**

11 346 The authors are grateful to the research partners and staff who supported this Cuamba OCV mass  
12  
13 347 vaccination campaign and monitoring and evaluation study on the ground. We thank Ms. Somyoung Cho  
14  
15 348 for the project management and Ms. Jihyun Han and Ms. Nozipho Manjate for the project administrative  
16  
17 349 support.  
18

19  
20 350

### 22 351 **Contributors**

23  
24 352 S.E.P conceptualized the overall study design of the Mozambique Cholera Prevention and Surveillance:  
25  
26 353 MOCA) project. N.S.B. conceptualized and supervised vaccination campaign and monitoring and  
27  
28 354 evaluation study component. J.C., N.L, and the project field team in Cuamba and Niassa contributed to  
29  
30 355 data acquisition on the community vaccine coverage survey, and interpretation of results under the  
31  
32 356 supervision of N.S.B. R.B.J.M., S.A., A.O., M.M., and others in the vaccination teams of Cuamba District  
33  
34 357 and Niassa Province contributed to acquisition on the administrative coverage data. J.C. drafted and  
35  
36 358 edited the paper under the scientific guidance from N.S.B and S.E.P. All authors read and approved the  
37  
38 359 final draft.  
39

40  
41 360

### 43 361 **Funding**

44  
45 362 Funding for this study (grant budget code: MOCA-CHKOI02051; award/grant number not applicable)  
46  
47 363 was provided by the Korea International Cooperation Agency (KOICA), government of the Republic of  
48  
49 364 Korea. The findings and conclusions are our own and do not necessarily reflect positions of the KOICA.  
50

51  
52 365

### 54 366 **Competing interests**

55  
56 367 The authors declare no competing interests.  
57  
58

1  
2  
3 368  
4

5 369 **Data sharing statement**

7 370 All data is presented in this manuscript. No additional data available.  
8  
9

10 371

11 372 **Figure legends**

13 373

14 374 **Figure 1. Pre-emptive OCV mass vaccination site**

16 375

17 376 Location of the pre-emptive OCV vaccination campaign site in Cuamba District, Mozambique, included

18 377 bairros and povoados in the municipality and district.  
19  
20  
21  
22

23 378  
24  
25  
26  
27  
28  
29  
30  
31  
32  
33  
34  
35  
36  
37  
38  
39  
40  
41  
42  
43  
44  
45  
46  
47  
48  
49  
50  
51  
52  
53  
54  
55  
56  
57  
58  
59  
60

**Table 1. OCV vaccine coverage estimates, Cuamba District, 2018****a) Administrative vaccine coverage rates of OCV**

|                                           |                   | Number of people vaccinated (No.) |               |               |               |               |               | Total         |
|-------------------------------------------|-------------------|-----------------------------------|---------------|---------------|---------------|---------------|---------------|---------------|
|                                           |                   | Day 1                             | Day 2         | Day 3         | Day 4         | Day 5         | Day 6         |               |
| <b>1<sup>st</sup> Dose</b>                | <b>Age (year)</b> |                                   |               |               |               |               |               |               |
| Individuals vaccinated per age group      | 1-4               | 6,493                             | 9,283         | 12,394        | 12,506        | 7,691         | -             | 48,367        |
|                                           | 5-15              | 7,050                             | 16,705        | 21,590        | 17,536        | 11,344        | -             | 74,225        |
|                                           | ≥15               | 10,136                            | 12,400        | 18,835        | 18,798        | 11,820        | -             | 71,989        |
| Total no. of daily vaccinated             |                   | 23,679                            | 38,388        | 52,819        | 48,840        | 30,855        | -             | 194,581       |
| Cumulative no. of vaccinated              |                   | 23,679                            | 62,067        | 114,886       | 163,726       | 194,581       | -             |               |
| <b>Cumulative administrative coverage</b> |                   | <b>12.04%</b>                     | <b>31.56%</b> | <b>58.42%</b> | <b>83.26%</b> | <b>98.95%</b> | -             | <b>98.95%</b> |
| <b>2<sup>nd</sup> Dose</b>                |                   |                                   |               |               |               |               |               |               |
| Individuals vaccinated per age group      | 1-4               | 5,479                             | 6,484         | 11,117        | 9,596         | 7,760         | 7,586         | 48,022        |
|                                           | 5-15              | 9,355                             | 8,796         | 15,679        | 13,208        | 14,444        | 10,665        | 72,147        |
|                                           | ≥15               | 9,416                             | 9,275         | 14,271        | 14,265        | 14,848        | 12,081        | 74,156        |
| Total no. of daily vaccinated             |                   | 24,250                            | 24,555        | 41,067        | 37,069        | 37,052        | 30,332        | 194,325       |
| Cumulative no. of vaccinated              |                   | 24,250                            | 48,805        | 89,872        | 126,941       | 163,993       | 194,325       |               |
| <b>Cumulative administrative coverage</b> |                   | <b>12.33%</b>                     | <b>24.82%</b> | <b>45.70%</b> | <b>64.55%</b> | <b>83.39%</b> | <b>98.82%</b> | <b>98.82%</b> |

**b) OCV vaccine coverage rates through coverage survey**

|                        |        | First Round      | Second Round     | Full Two Doses   |
|------------------------|--------|------------------|------------------|------------------|
| <b>Age (years old)</b> | 1- 4   | 81.1±4.5%        | 72.2±6.9%        | 64.4±7.3%        |
|                        | 5-14   | 86.4±3.1%        | 71.3±5.8%        | 65.2±6.1%        |
|                        | ≥15    | 67.6±3.3%        | 65.2±4.8%        | 55.7±5.0%        |
| <b>Sex</b>             | Male   | 76.3±2.9%        | 77.8±3.9%        | 57.3±4.6%        |
|                        | Female | 75.4±3.2%        | 67.7±5.0%        | 64.4±5.1%        |
| <b>Total</b>           | -      | <b>75.9±2.2%</b> | <b>68.5±3.3%</b> | <b>60.4±3.4%</b> |

388 **Table 2. Source of information on OCV campaign, Cuamba District, 2018**

389

| Source of information | 1 <sup>st</sup> Round <sup>1</sup><br>N= 646<br>n (%=n/N) | 2 <sup>nd</sup> Round <sup>2</sup><br>N= 578<br>n (%=n/N) |
|-----------------------|-----------------------------------------------------------|-----------------------------------------------------------|
| Megaphone             | 152 (24%)                                                 | 195 (34%)                                                 |
| Family                | 60 (9%)                                                   | 53 (9%)                                                   |
| Radio                 | 96 (15%)                                                  | 23 (4%)                                                   |
| Religious leader      | 82 (13%)                                                  | 25 (4%)                                                   |
| Health workers        | 74 (11%)                                                  | 120 (21%)                                                 |
| Activists             | 55 (9%)                                                   | 9 (2%)                                                    |
| Community leader      | 33 (5%)                                                   | 108 (19%)                                                 |
| TV                    | 14 (2%)                                                   | 11 (2%)                                                   |
| Others <sup>3</sup>   | 78 (12%)                                                  | 33 (6%)                                                   |

390 Footnote:

391 <sup>1</sup> 1<sup>st</sup> round: 646 households/or people were interviewed.

392 <sup>2</sup> 2<sup>nd</sup> round: 578 households/or people were interviewed.

393 <sup>3</sup> Others included: list other source of info if such data were collected.

394 **Table 3. Reasons for non-vaccination during the OCV campaign, Cuamba District, 2018**

395

| Reasons for non-vaccination                             | 1 <sup>st</sup> Dose |     | 2 <sup>nd</sup> Dose |     |
|---------------------------------------------------------|----------------------|-----|----------------------|-----|
|                                                         | n=361                | %   | n=222                | %   |
| Unavailable                                             | 63                   | 17% | 96                   | 43% |
| Incompatibility between working hours and campaign time | 53                   | 15% | 18                   | 8%  |
| Vaccination post without vaccinator                     | 40                   | 11% | 41                   | 18% |
| Did not have information                                | 66                   | 18% | 23                   | 10% |
| Ill during the vaccination period                       | 30                   | 8%  | 10                   | 5%  |
| Does not believe in vaccine efficacy                    | 24                   | 7%  | 2                    | 1%  |
| Afraid of adverse events                                | 8                    | 2%  | 0                    | 0%  |
| Head of the family did not authorize                    | 4                    | 1%  | 2                    | 1%  |
| Religious leader forbid                                 | 2                    | 1%  | 0                    | 0%  |
| Considered not safe for pregnant women                  | 1                    | 0%  | 2                    | 1%  |
| Other                                                   | 70                   | 19% | 28                   | 13% |

396

**Table 4. Costs of OCV vaccine delivery and immunization in Cuamba District**

| <b>Vaccine Delivery Costs</b>                        | <b>Financial Cost<br/>(Mzn)</b> | <b>Economic Cost<br/>(Mzn)</b> | <b>Financial Cost<br/>(USD)</b> | <b>Economic Cost<br/>(USD)</b> |
|------------------------------------------------------|---------------------------------|--------------------------------|---------------------------------|--------------------------------|
| Vaccine Acquisition                                  | 32,179,644                      | 42,081,073                     | 533,659                         | 697,862                        |
| Microplanning                                        | 640,415                         | 7,596,625                      | 10,620                          | 125,981                        |
| Training                                             | 265,186                         | 299,419                        | 4,398                           | 4,965                          |
| Communication and Social Mobilization                | 1,912,520                       | 4,301,342                      | 31,717                          | 71,332                         |
| Vaccination Implementation (Round 1 &2)              | 11,367,160                      | 58,510,806                     | 188,510                         | 970,328                        |
| <b>Total</b>                                         | <b>46,364,925</b>               | <b>112,789,265</b>             | <b>768,904</b>                  | <b>1,870,469</b>               |
| <b>Immunization Costs</b>                            | <b>Financial Cost<br/>(Mzn)</b> | <b>Economic Cost<br/>(Mzn)</b> | <b>Financial Cost<br/>(USD)</b> | <b>Economic Cost<br/>(USD)</b> |
| Cost per Vaccine Administered (including vaccine)    | 119                             | 290                            | 1.98                            | 4.81                           |
| Cost per Vaccine Administered (without vaccine cost) | 36                              | 182                            | 0.60                            | 3.02                           |
| Cost per Partially Immunized Person                  | 238                             | 580                            | 3.95                            | 9.61                           |
| Cost per Fully Immunized Person (with vaccine)       | 239                             | 580                            | 3.96                            | 9.63                           |
| Cost per Fully Immunized Person (without vaccine)    | 73                              | 364                            | 1.21                            | 6.03                           |

400 **References**

- 401 1. Chun-Hai Fung I, Fitter DL, Borse RH, Meltzer MI, Tappero JW. **Modeling the Effect of Water,**  
402 **Sanitation, and Hygiene and Oral Cholera Vaccine Implementation in Haiti.** *Am J Trop Med*  
403 *Hyg.* 2013 Oct 9;89(4):633–40.
- 404 2. Langa JP, Sema C, De Deus N, Colombo MM, Taviani E. **Epidemic waves of cholera in the last**  
405 **two decades in Mozambique.** *J Infect Dev Ctries* [Internet]. 2015 Jul 4 [cited 2015 Oct 5];9(06).  
406 Available from: <http://www.jidc.org/index.php/journal/article/view/6943>
- 407 3. WHO. 2013. **Cholera country profile: Mozambique.** Global Task Force on Cholera Control.
- 408 4. Semá Baltazar C, Rafael F, Langa JPM, Chicumbe S, Cavailler P, Gessner BD, *et al.* **Oral cholera**  
409 **vaccine coverage during a preventive door-to-door mass vaccination campaign in Nampula,**  
410 **Mozambique.** *PloS One.* 2018;13(10): e0198592.
- 411 5. WHO. **Cholera vaccines: WHO position paper –August 2017.** *Wkly Epidemiol Rec.*  
412 2017;92(34):477–498
- 413 6. Instituto Nacional de Estatística (INE). 2017. **IV Recenseamento Geral da População e Habitação.**  
414 **Divulgação os resultados preliminares IV RGPH 2017: Habitação, agregados familiares e**  
415 **população, Província de Niassa, p. 3.**
- 416 7. Gujral L, Sema C, Rebaudet S, Taibo CLA, Manjate AA, Piarroux R, *et al.* **Cholera epidemiology**  
417 **in Mozambique using national surveillance data.** *J Infect Dis.* 2013 Nov 1;208 Suppl 1:S107-114.
- 418 8. Instituto Nacional de Estatística (INE). 2007. **Recenseamento Geral da População e Habitação**  
419 **2007: Indicadores Sócio Demográficos, Província de Niassa, p. 63.**
- 420 9. Morgan, W. *et al.* (2020). **Costing oral cholera vaccine delivery using a generic oral cholera**  
421 **vaccine delivery planning and costing tool (CholTool).** *Human Vaccines and Immunotherapeutics.*  
422 Taylor & Francis, 16(12), pp. 3111–3118. doi: 10.1080/21645515.2020.1747930.
- 423 10. Clemens JD, Sack DA, Harris JR, Chakraborty J, Khan MR, *et al.* (1986). **Field trial of oral**  
424 **cholera vaccines in Bangladesh.** *Lancet* 2: 124–127.



- 1  
2  
3 425 11. Clemens JD, Sack DA, Harris JR, Van Loon F, Chakraborty J, *et al.* (1990) **Field trial of oral**  
4  
5 426 **cholera vaccines in Bangladesh: Results from three-year follow-up.** *Lancet* 335: 270–273.  
6  
7 427 12. Longini IM, Nizam A, Ali M, Yunus M, Shenvi N. (2007). **Controlling endemic cholera with**  
8  
9 428 **oral vaccines.** *PLoS Med* 4: e336. doi:10.1371/journal.pmed.0040336.  
10  
11 429 13. Lucas ME, Deen JL, von Seidlein L, Wang X-Y, Ampuero J, Puri M, *et al.* **Effectiveness of mass**  
12  
13 430 **oral cholera vaccination in Beira, Mozambique.** *N Engl J Med.* 2005;352(8):757–767.  
14  
15 431 14. D. Legros, C. Paquet, W. Perea, I. Marty, N. Kenya Mugisha, H. Royer, M. Neira, & B. Ivanoff.  
16  
17 432 1999. **Mass vaccination with a two-dose oral cholera vaccine in a refugee camp in Sudan,**  
18  
19 433 **Uganda.** *Bulletin of the World Health Organization*, 77(10).  
20  
21 434 15. Gavi, the Vaccine Alliance. Vaccine introduction grants and operational support  
22  
23 435 for campaigns. Report to the GAVI Alliance Board. 12-13 June 2012. Available at:  
24  
25 436 [https://www.gavi.org/sites/default/files/board/minutes/2012/12-june/13%20-](https://www.gavi.org/sites/default/files/board/minutes/2012/12-june/13%20-%20Vaccine%20introduction%20grants%20and%20operation%20support%20for%20campaigns%20document.pdf)  
26  
27 437 [%20Vaccine%20introduction%20grants%20and%20operation%20support%20for%20campaigns%](https://www.gavi.org/sites/default/files/board/minutes/2012/12-june/13%20-%20Vaccine%20introduction%20grants%20and%20operation%20support%20for%20campaigns%20document.pdf)  
28  
29 438 [20document.pdf](https://www.gavi.org/sites/default/files/board/minutes/2012/12-june/13%20-%20Vaccine%20introduction%20grants%20and%20operation%20support%20for%20campaigns%20document.pdf) (Accessed on 9 February, 2021).  
30  
31 439 16. Gavi, the Vaccine Alliance. GAVI Alliance Board Meeting. 12-13 June 2012, Washington, DC,  
32  
33 440 USA, Final Minutes. Available at:  
34  
35 441 [https://www.gavi.org/sites/default/files/board/minutes/2012/Board-2012-Mtg-02%20-](https://www.gavi.org/sites/default/files/board/minutes/2012/Board-2012-Mtg-02%20-%20Minutes.pdf)  
36  
37 442 [%20Minutes.pdf](https://www.gavi.org/sites/default/files/board/minutes/2012/Board-2012-Mtg-02%20-%20Minutes.pdf) (Accessed on 9 February, 2021).  
38  
39  
40  
41  
42 443

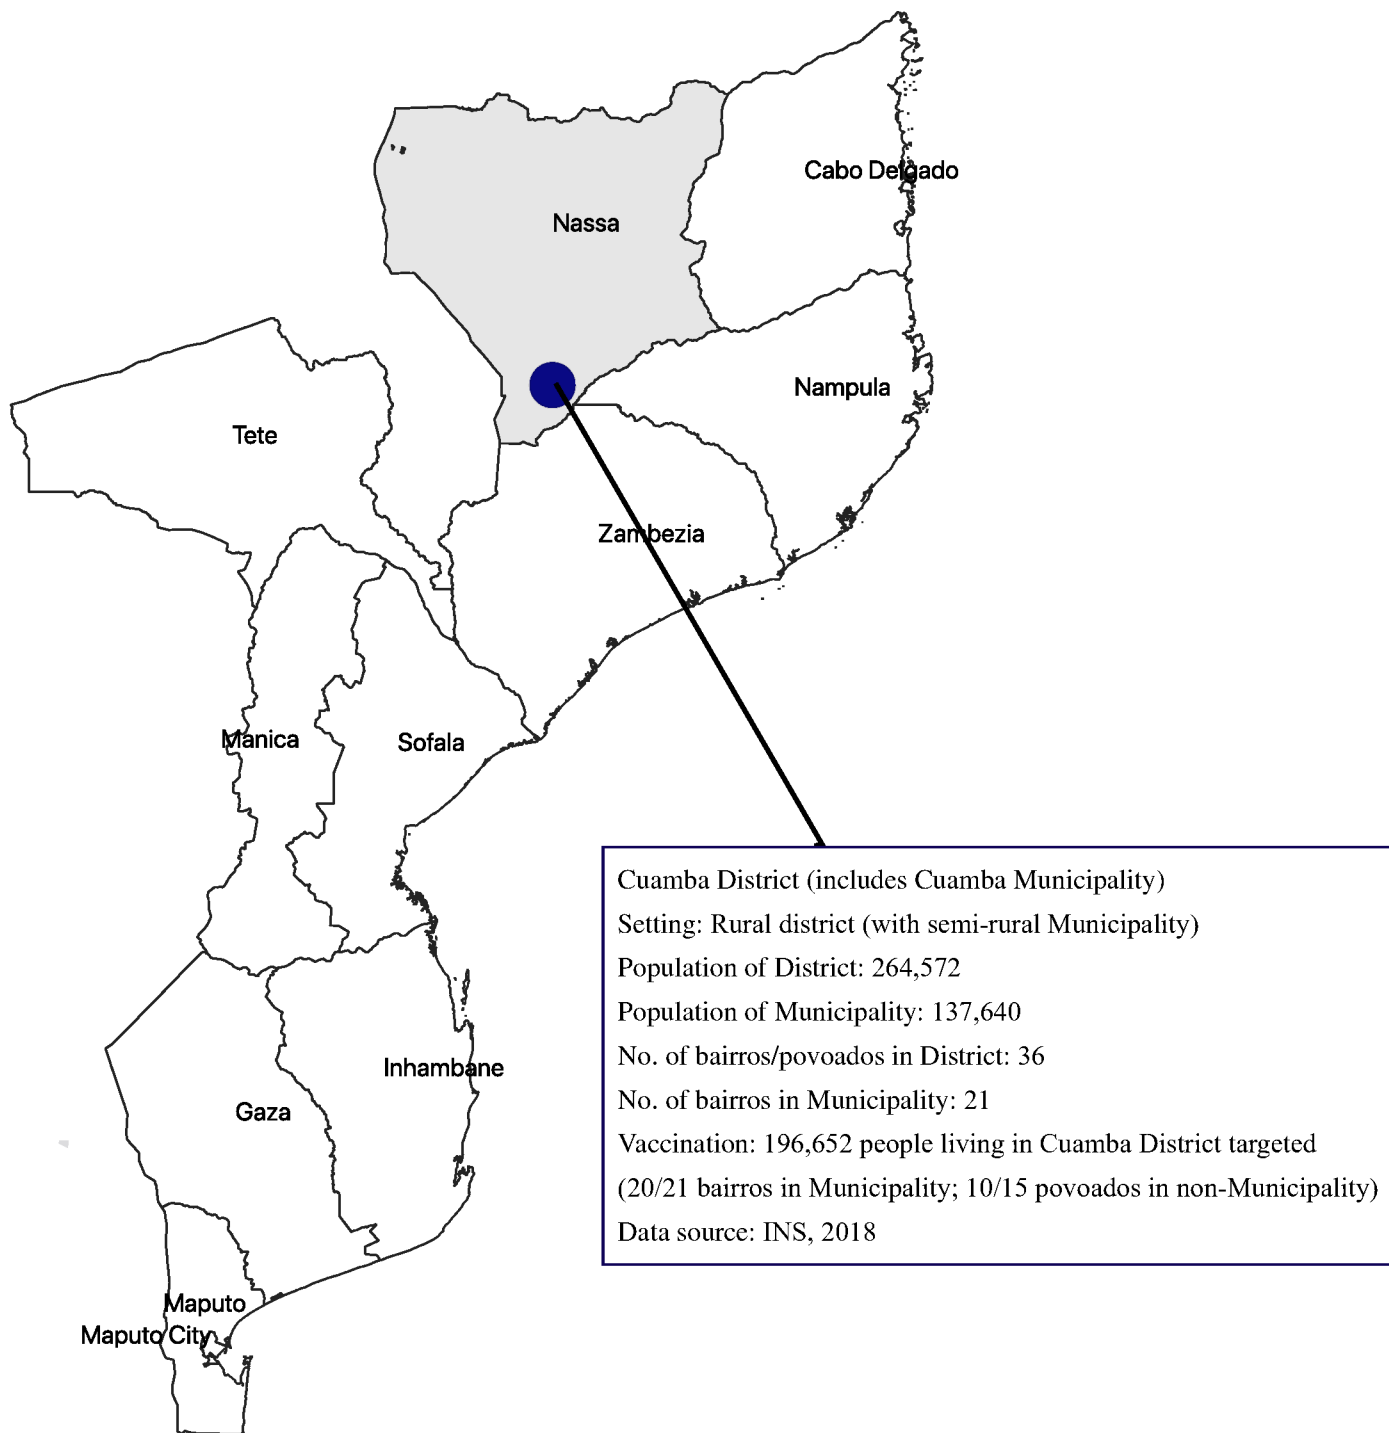

Figure 1. Pre-emptive OCV mass vaccination site

# BMJ Open

## A pre-emptive Oral Cholera Vaccine (OCV) mass vaccination campaign in Cuamba District, Niassa Province, Mozambique: feasibility, costs and vaccination coverage

|                                 |                                                                                                                                                                                                                                                                                                                                                                                                                                                                                                                                                                                                                                                                                                                                                                                                                                                                                                                                                                                                                                                                                                                             |
|---------------------------------|-----------------------------------------------------------------------------------------------------------------------------------------------------------------------------------------------------------------------------------------------------------------------------------------------------------------------------------------------------------------------------------------------------------------------------------------------------------------------------------------------------------------------------------------------------------------------------------------------------------------------------------------------------------------------------------------------------------------------------------------------------------------------------------------------------------------------------------------------------------------------------------------------------------------------------------------------------------------------------------------------------------------------------------------------------------------------------------------------------------------------------|
| Journal:                        | <i>BMJ Open</i>                                                                                                                                                                                                                                                                                                                                                                                                                                                                                                                                                                                                                                                                                                                                                                                                                                                                                                                                                                                                                                                                                                             |
| Manuscript ID                   | bmjopen-2021-053585.R1                                                                                                                                                                                                                                                                                                                                                                                                                                                                                                                                                                                                                                                                                                                                                                                                                                                                                                                                                                                                                                                                                                      |
| Article Type:                   | Original research                                                                                                                                                                                                                                                                                                                                                                                                                                                                                                                                                                                                                                                                                                                                                                                                                                                                                                                                                                                                                                                                                                           |
| Date Submitted by the Author:   | 12-Feb-2022                                                                                                                                                                                                                                                                                                                                                                                                                                                                                                                                                                                                                                                                                                                                                                                                                                                                                                                                                                                                                                                                                                                 |
| Complete List of Authors:       | Elias Chitio, Jucunú J.; National Institute of Health<br>Baltazar, Cynthia; National Institute of Health<br>Langa, José Paulo; National Institute of Health<br>Baloi, Liliana Dengo; National Institute of Health<br>Manuel, José Alberto; Provincial Directorate of Health, Provincial Directorate of Health<br>Mboane, Ramos B. J.; Provincial Directorate of Health, Provincial Directorate of Health<br>Assane, Sadate; Provincial Directorate of Health, Provincial Directorate of Health<br>Omar, Alide; District Health Directorate, District Health Directorate<br>Manso, Mariana; District Health Directorate, District Health Directorate<br>Capitine, Igor; National Institute of Health<br>Van Rensburg, Craig; International Vaccine Institute<br>Luiz, Naira; National Institute of Health; International Vaccine Institute<br>Mogasale, Vittal; International Vaccine Institute, Policy and Economic Research<br>Marks, Florian ; International Vaccine Institute<br>Park, Se Eun; International Vaccine Institute; Yonsei University<br>Beck, Namseon; International Vaccine Institute; Medair Headquarters |
| <b>Primary Subject Heading</b>: | Global health                                                                                                                                                                                                                                                                                                                                                                                                                                                                                                                                                                                                                                                                                                                                                                                                                                                                                                                                                                                                                                                                                                               |
| Secondary Subject Heading:      | Infectious diseases, Health economics, Global health, Health policy                                                                                                                                                                                                                                                                                                                                                                                                                                                                                                                                                                                                                                                                                                                                                                                                                                                                                                                                                                                                                                                         |
| Keywords:                       | PUBLIC HEALTH, HEALTH ECONOMICS, INFECTIOUS DISEASES, PREVENTIVE MEDICINE, Infection control < INFECTIOUS DISEASES                                                                                                                                                                                                                                                                                                                                                                                                                                                                                                                                                                                                                                                                                                                                                                                                                                                                                                                                                                                                          |
|                                 |                                                                                                                                                                                                                                                                                                                                                                                                                                                                                                                                                                                                                                                                                                                                                                                                                                                                                                                                                                                                                                                                                                                             |

SCHOLARONE™  
Manuscripts



I, the Submitting Author has the right to grant and does grant on behalf of all authors of the Work (as defined in the below author licence), an exclusive licence and/or a non-exclusive licence for contributions from authors who are: i) UK Crown employees; ii) where BMJ has agreed a CC-BY licence shall apply, and/or iii) in accordance with the terms applicable for US Federal Government officers or employees acting as part of their official duties; on a worldwide, perpetual, irrevocable, royalty-free basis to BMJ Publishing Group Ltd ("BMJ") its licensees and where the relevant Journal is co-owned by BMJ to the co-owners of the Journal, to publish the Work in this journal and any other BMJ products and to exploit all rights, as set out in our [licence](#).

The Submitting Author accepts and understands that any supply made under these terms is made by BMJ to the Submitting Author unless you are acting as an employee on behalf of your employer or a postgraduate student of an affiliated institution which is paying any applicable article publishing charge ("APC") for Open Access articles. Where the Submitting Author wishes to make the Work available on an Open Access basis (and intends to pay the relevant APC), the terms of reuse of such Open Access shall be governed by a Creative Commons licence – details of these licences and which [Creative Commons](#) licence will apply to this Work are set out in our licence referred to above.

Other than as permitted in any relevant BMJ Author's Self Archiving Policies, I confirm this Work has not been accepted for publication elsewhere, is not being considered for publication elsewhere and does not duplicate material already published. I confirm all authors consent to publication of this Work and authorise the granting of this licence.

1  
2  
3 **1 A pre-emptive Oral Cholera Vaccine (OCV) mass vaccination campaign in Cuamba District, Niassa**  
4  
5 **2 Province, Mozambique: feasibility, costs and vaccination coverage**  
6  
7  
8  
9

10 4 Jucunú J. Elias Chitio<sup>1</sup>, Cynthia Semá Baltazar<sup>1</sup>, José Paulo Langa<sup>1</sup>, Liliana Dengo Baloi<sup>1</sup>, Ramos B. J.  
11 5 Mboane<sup>2</sup>, José Alberto Manuel<sup>2</sup>, Sadate Assane<sup>2</sup>, Alide Omar<sup>3</sup>, Mariana Manso<sup>3</sup>, Igor Capatine<sup>1</sup>, Craig  
12 6 Van Rensburg<sup>4</sup>, Naira Luiz<sup>1,4</sup>, Vittal Mogasale<sup>4</sup>, Florian Marks<sup>4,5</sup>, Se Eun Park<sup>4,6,#</sup> and Namseon Beck<sup>4,7</sup>  
13  
14  
15  
16  
17

18 8 <sup>1</sup> National Institute of Health, Maputo, Mozambique

19 9 <sup>2</sup> Provincial Health Directorate, Niassa, Mozambique

20 10 <sup>3</sup> District Health Directorate, Cuamba, Mozambique

21  
22 11 <sup>4</sup> International Vaccine Institute, SNU Research Park, 1 Gwanak-ro, 1 Gwanak-gu, Seoul, 08826,  
23  
24 12 Republic of Korea

25  
26 13 <sup>5</sup> The Department of Medicine, The University of Cambridge, United Kingdom

27  
28 14 <sup>6</sup> Graduate School of Public Health, Yonsei University, 50 Yonsei-ro, Seodaemun-gu, Seoul, 03722,  
29  
30 15 Republic of Korea

31  
32 16 <sup>7</sup> MEDAIR, Switzerland  
33  
34  
35  
36  
37  
38

39 18 # Corresponding author:

40  
41 19 Se Eun Park, PhD; International Vaccine Institute, 1 Gwanak-ro, 1 Gwanak-gu, Seoul, 151-742; Republic  
42  
43 20 of Korea; T: +82-2-881-1154; Email: SeEun.Park@ivi.int  
44  
45  
46  
47  
48  
49  
50  
51  
52  
53  
54  
55  
56  
57  
58  
59  
60

1  
2  
3 **22 Abstract**  
4

5 **23**  
6  
7 **24 Background:** Mozambique suffers from regular floods along its principal river basins and periodic  
8  
9 **25** cyclones that resulted in several cholera epidemics during the last decades. Cholera outbreaks in the  
10  
11 **26** recent five years affected particularly the northern provinces of the country including Nampula and  
12  
13 **27** Niassa provinces. A pre-emptive Oral Cholera Vaccine (OCV) mass vaccination campaign was conducted  
14  
15 **28** in Cuamba District, Niassa Province, and the feasibility, costs, and vaccination coverage assessed.  
16  
17

18 **29**  
19  
20 **30 Method:** World Health Organization prequalified OCV (Euvichol-Plus), a killed whole-cell bivalent  
21  
22 **31** vaccine containing *Vibrio cholerae* O1 (classical and El Tor) and O139, was administered in two-doses  
23  
24 **32** with a 15-day interval during 7-31 August 2018, targeting around 180,000 people aged above one year in  
25  
26 **33** Cuamba District. Microplanning, community sensitization, and trainings of local public health  
27  
28 **34** professionals and field enumerators were conducted. Feasibility and costs of vaccination were assessed  
29  
30 **35** using CholTool. Vaccination coverage and barriers were assessed through community surveys.  
31  
32

33 **36**  
34  
35 **37 Findings:** The administrative coverage of the first and second rounds of the campaign were 98.9%  
36  
37 **38** (194,581) and 98.8% (194,325) respectively based on the available population data that estimated total  
38  
39 **39** 196,652 inhabitants in the target area. The vaccination coverage survey exhibited 75.9% ( $\pm 2.2\%$ ) and  
40  
41 **40** 68.5% ( $\pm 3.3\%$ ) coverages for the first and second rounds, respectively. Overall, 60.4% ( $\pm 3.4\%$ ) of the  
42  
43 **41** target population received full two-doses of OCV. Barriers to vaccination included incompatibility  
44  
45 **42** between working hours and campaign time. No severe adverse events were notified. The total financial  
46  
47 **43** cost per dose delivered was US\$0.60 without vaccine cost and US\$1.98 including vaccine costs.  
48  
49

50 **44**  
51  
52 **45 Conclusion:** The pre-emptive OCV mass vaccination campaign in remote setting in Mozambique was  
53  
54 **46** feasible with reasonable full-dose vaccination coverage to confer sufficient herd immunity for at least the  
55  
56  
57  
58  
59  
60

1  
2  
3 47 next three to five years. The delivery cost estimate indicates that the OCV campaign is affordable as it is  
4  
5 48 comparable to Gavi's operational support for vaccination campaigns.  
6

7 49

9 50 **Key words:** Cholera, OCV, pre-emptive vaccination, Cuamba, Mozambique, vaccination coverage  
11 51 survey, feasibility, vaccination cost  
12  
13  
14  
15  
16  
17  
18  
19  
20  
21  
22  
23  
24  
25  
26  
27  
28  
29  
30  
31  
32  
33  
34  
35  
36  
37  
38  
39  
40  
41  
42  
43  
44  
45  
46  
47  
48  
49  
50  
51

For peer review only

## 52 **Strengths and limitations of this study**

- 53 • This study has successfully demonstrated the feasibility of an OCV mass vaccination campaign in a  
54 remote setting in Mozambique.
- 55 • The cost of a mass vaccination campaign for the two-dose OCV administrations has been analysed for  
56 the first time in Mozambique, which can serve as a reference cost estimate when planning for any  
57 OCV vaccination programs in a similar setting in Mozambique or other countries.
- 58 • Vaccination coverage estimates may be affected if there are people movements in and out of the study  
59 area. A sub-study on this and a focused community engagement strategy to reduce the identified  
60 barriers to vaccination should be considered in future vaccination programs.

## 62 **Introduction**

63 Cholera is a vaccine preventable disease that remains as a major public health concern in many parts of  
64 low- and middle-income countries (LMICs). A comprehensive policy measure is warranted to control and  
65 prevent cholera including investments in improving infrastructure and knowledge, attitude, and behavior  
66 associated with water, sanitation, and hygiene (WaSH), strengthening health system, and adequate use of  
67 oral cholera vaccine (OCV) (1). In Mozambique, cholera has been endemic since the early 1970's when  
68 the first cholera outbreak was reported in the country. Several epidemics followed since then including  
69 the outbreaks in 1997-1999 and 2012-2016 (2, 3). Cholera outbreaks are more frequent in the country's  
70 northern provinces including Nampula, Cabo Delgado, Tete, and Niassa (4). Following the reinforcement  
71 of cholera outbreak response strategies, the Ministry of Health (MOH) of Mozambique has carried out  
72 several OCV mass vaccination campaigns, as recommended by the World Health Organization (WHO) as  
73 an integral part of a comprehensive strategy for cholera prevention and control in endemic setting along  
74 with primary interventions of WaSH measures (5): Recent cholera outbreaks in these cholera endemic and  
75 hotspot areas in December 2015 resulted in the use of global OCV emergency stockpile to vaccinate  
76 approximately 212,745 people living in six neighborhoods of Nampula city in 2016 (4); and in April



1  
2  
3 77 2017, another 709,077 doses from the stockpile to vaccinate approximately 354,550 people in Tete City  
4  
5 78 and Moatize and Mutarara districts, in response to the cholera outbreak with over 3,592 cholera cases.  
6  
7 79  
8  
9 80 In addition to these reactive vaccination campaigns supported by the WHO International Coordinating  
10  
11 81 Group (ICG) on vaccine provision for cholera, a growing need for a preventive public health intervention  
12  
13 82 using a targeted vaccination approach in cholera priority areas in-country was identified. The past records  
14  
15 83 of numerous episodes of cholera epidemics in Mozambique have spotted at-risk districts in the most  
16  
17 84 cholera endemic provinces such as Nampula (particularly Nampula City), Niassa (Lichinga city and  
18  
19 85 Cuamba and Lago Districts), and Cabo Delgado (Pemba City and Ancuabe District), and to a lesser  
20  
21 86 degree, other provinces and districts with limited sanitary conditions (5). Niassa province, one of the  
22  
23 87 cholera endemic regions with annual cholera outbreaks affecting largely the Lichinga City and Lago and  
24  
25 88 Cuamba Districts, was identified for a planned pre-emptive vaccine introduction to prevent subsequent  
26  
27 89 cholera outbreaks. Cuamba District with an estimated population of 264,572 (6), reports over 200  
28  
29 90 suspected cholera and 2,000 diarrheal cases almost every year, with an exception of 2014 and 2016 (7).  
30  
31 91 Here, we describe the feasibility, costs, and coverage estimates associated with a pre-emptive OCV mass  
32  
33 92 vaccination campaign conducted in Cuamba District using two-dose OCVs (Euvichol-Plus) administered  
34  
35 93 to approximately 180,000 people with a 15-day interval between the doses, as well as challenges of  
36  
37 94 delivering healthcare in resource limited rural setting in Mozambique.  
38  
39  
40  
41  
42

## 43 96 **Methods**

### 47 98 *Study site and population*

49 99 The Cuamba District is located in Niassa Province with a population size of around 264,572 (6). The site  
50  
51 100 was selected for a pre-emptive OCV mass vaccination campaign as the district includes the Cuamba  
52  
53 101 Municipality area where cholera is found to be endemic with periodic outbreaks. The area was also  
54  
55 102 highlighted by the WHO as one of the priority sites to consider for a potential OCV intervention during a  
56  
57  
58  
59

1  
2  
3 103 needs-assessment performed in September 2015 (1). The District of Cuamba is composed of a total 36  
4  
5 104 bairros and povoados with population size of approximately 264,572 (6), which includes 21 bairros in the  
6  
7 105 Cuamba Municipality area with around 137,640 residents (8). In total, approximately 180,000 individuals  
8  
9 106 living in Cuamba District was targeted initially, and ultimately around 196,652 people living in Cuamba  
10  
11 107 District were targeted, which included 20 Bairros in the Municipality area and 10 Povoados in the  
12  
13 108 outskirts of the Municipality area (Figure 1). Selection of bairros and povoados in the outskirts of  
14  
15 109 Cuamba Municipality within the District was made not only based on the high number of doses destined  
16  
17 110 for the target population in the municipality area, but also the records of cholera cases during the  
18  
19 111 outbreaks. Everyone above one year of age were eligible for the two-dose OCV administration.  
20  
21  
22 112

### 23 24 113 ***Vaccine delivery, storage, and handling***

25  
26 114 Approximately 360,000 doses of WHO pre-qualified Euvichol-Plus, a killed whole-cell bivalent OCV  
27  
28 115 containing *Vibrio cholerae* O1 (classical and El Tor) and O139, were procured from the manufacturer  
29  
30 116 (EuBiologics) and shipped to the entry port in Pemba, Mozambique in cold-chain. Upon arrival in  
31  
32 117 Mozambique, the vaccines were delivered to Lichinga by airfreight and transported to a central vaccine  
33  
34 118 storage room in Cuamba project site, and kept in refrigerators with temperature maintained within range  
35  
36 119 between 2-8°C until and throughout the campaign. The vaccine vial monitor (VVM) and electronic  
37  
38 120 shipping indicators (Q-Tag) were used to monitor the temperature of the vaccines during delivery,  
39  
40 121 storage, and handling. During the vaccination campaign, cool boxes with dry ice maintained within 2-8°C  
41  
42 122 were used to carry the vaccines to the vaccination posts.  
43  
44  
45

### 46 123 47 48 124 ***Cost of vaccine delivery***

49  
50 125 An openly available, standardized and validated Excel-based tool known as the CholTool was used for  
51  
52 126 estimating vaccine delivery costs (9). This tool comprehensively estimates programmatic costs such as  
53  
54 127 microplanning, communication and training materials development, sensitization/social mobilization, and  
55  
56  
57  
58  
59  
60

1  
2  
3 128 personnel training, as well as costs related to vaccine delivery such as vaccine procurement, handling,  
4  
5 129 storage, and transport, vaccination administration, adverse events following immunization (AEFI)  
6  
7 130 management, monitoring supervision, and field support. The CholTool has the ability to estimate both  
8  
9 131 financial and economic costs. Financial costs refer to the monetary costs to the payer (e.g., allowances,  
10  
11 132 supplies, transport, and resources used in micro-planning, training, and sensitization/social mobilization)  
12  
13 133 while economic costs include financial costs along with non-monetary costs of donated goods and  
14  
15 134 resources already available (e.g., health personnel time). Key informant interviews were conducted at  
16  
17 135 various administrative levels before, during and after the vaccination campaign in order to identify the  
18  
19 136 resources necessary for each vaccination related activity and costs of respective resources for each of the  
20  
21 137 two rounds of vaccination. The resource and cost data were entered in CholTool which auto-calculates  
22  
23 138 OCV delivery costs. The costs were reported in 2018 in United States Dollars (US\$) based on  
24  
25 139 government and payer perspective.  
26  
27  
28  
29

140

### 141 ***Vaccination Strategy and microplanning***

142 A fixed post vaccination strategy with additional mobile teams was adapted for the microplanning of the  
143 vaccination campaign. The vaccination teams for 15 fixed posts and 33 mobile teams were identified and  
144 trained prior to the campaign. The fixed posts included existing healthcare facilities such as primary  
145 health centers and secondary and referral hospital, schools, market areas where many people have easy  
146 access to. The mobile teams were deployed to households remotely located with limited access to these  
147 fixed posts. This adopted mixed vaccination strategy aimed to improve quality, accessibility, and  
148 coverage. Each post was staffed with around 5 field workers including 2 health workers and 3 community  
149 engagement workers. Five days prior to the vaccination campaign, micro-plans for each cluster were  
150 prepared with postal addresses, target populations, vaccination dates, teams, and other site-specific  
151 resources. The health workers obtained verbal informed consents from the individuals visiting the  
152 vaccination posts for the OCV administration. Pregnant women by self-report or infants below one year  
153 old were excluded from the vaccination. Vaccination cards and vaccination registry book were developed

1  
2  
3 154 and deployed, specific to this vaccination that included variables such as name, age, address, and  
4  
5 155 vaccination date. The collected data in the vaccine registry book were entered in an excel-based database.  
6  
7 156 The number of doses planned and administered were also recorded daily for each rounds of the  
8  
9 157 vaccination campaign.  
10

11  
12 158

### 13 14 159 *Vaccination, adverse event monitoring, and coverage estimate*

15  
16 160 The vaccination campaign occurred in two rounds with a 15-day interval. The first round took place  
17  
18 161 during August 7-11, followed by the second round during August 27–31, 2018. Provision was made for  
19  
20 162 mop-up activities after the second round for those who missed the second dose. To detect any possible  
21  
22 163 adverse events following immunization (AEFI) during and after the campaign, health workers were  
23  
24 164 trained to monitor and notify any adverse events encountered in inpatient and outpatient admissions at  
25  
26 165 Cuamba health facilities from the first day of each round throughout the 15 days after the last day of each  
27  
28 166 round.  
29

30  
31 167

32  
33 168 The vaccination coverage estimates were assessed in two-folds; administrative coverage and coverage  
34  
35 169 surveys. The administrative coverage was recorded by the local government health office in charge of the  
36  
37 170 vaccination campaign by tracking the number of vaccine doses administered compared to doses that had  
38  
39 171 been planned in the vaccination target areas, at the end of vaccination activities every day during the two  
40  
41 172 rounds of the OCV vaccination campaign. For the vaccination coverage surveys, around 520-650  
42  
43 173 households, subject to the vaccination schedule including the mop-up vaccination, were estimated to  
44  
45 174 ensure more than 550 samples for each age group (1-4 years, 5-14 years, 15 years and above) assuming  
46  
47 175 80% coverage with a design effect of 2 to achieve around 5% of prevision. Sampled households were  
48  
49 176 organized per cluster; total 20-25 clusters with 26 households per cluster. The households were selected  
50  
51 177 using a two-stage cluster random sampling methodology. Clusters (primary sampling unit) were selected  
52  
53 178 from the list of villages in the Health Zones, according to the Probability Proportional to Population Size  
54  
55 179 (PPS) and households (secondary sampling unit) were chosen randomly. For the household random  
56  
57  
58  
59  
60

1  
2  
3 180 sampling, the enumerators identified the center point and boundary of the survey target area and applied  
4  
5 181 random selection of households. The surveyors were recruited based on their knowledge on the local area  
6  
7 182 and level of education to conduct the survey, and trained on household sampling methodology, structured  
8  
9 183 survey questionnaire, and process of conducting a survey interview, including verbal informed consent  
10  
11 184 and data capturing on the paper-based survey questionnaires.  
12  
13  
14 185

15  
16 186 Over the period of the OCV vaccination campaign, five survey teams were deployed to the predetermined  
17  
18 187 clusters for daily vaccination monitoring, where randomly identified 26 households per cluster (5 clusters  
19  
20 188 with total 130 households per day) were visited for 4-5 days (total 520-650 households) from the second  
21  
22 189 or third day of the campaign until one day after the last vaccination day. This was applied for each round  
23  
24 190 of the two-dose OCV vaccination campaigns. The information gathered through the survey on the vaccine  
25  
26 191 uptake in the previous day, barriers against the vaccination, and the information source on the campaign  
27  
28 192 were analyzed and fed daily to the vaccination campaign coordinators and supervisors in order to  
29  
30 193 facilitate overall vaccine uptakes. After the second round, the enumerators continued the household  
31  
32 194 survey for additional three days to estimate the coverage of two full doses of vaccination.  
33  
34  
35 195

### 36 37 196 ***Patient and Public Involvement***

38  
39 197 The vaccination campaign was conducted as a part of the government's public health intervention,  
40  
41 198 approved by the Ministry of Health (MOH) in Mozambique. The participants in this study were people  
42  
43 199 living in the cholera endemic and hotspot area, targeted for OCV vaccination campaign as an integral part  
44  
45 200 of the government's cholera prevention efforts. The vaccination target population living in Cuamba  
46  
47 201 District were sensitized and engaged, prior to and during the vaccination campaign, by the district and  
48  
49 202 provincial health officials, study team that included the MOH and National Institute of Health  
50  
51 203 government officials, and local public health professionals at healthcare facilities. The participants were  
52  
53 204 provided with information on the planned OCV mass vaccination such as the purpose of pre-emptive  
54  
55 205 vaccination and detailed information on where and when the vaccination campaigns were to take place.  
56  
57  
58  
59  
60

1  
2  
3 206 The vaccination campaign was also announced through various press and social media in Mozambique  
4  
5 207 for public awareness and involvement. The study was conducted in a transparent manner with open  
6  
7 208 communication and information sharing in the community, and participants to the OCV vaccination and  
8  
9 209 vaccination coverage surveys were informed for oral consent. For children, consents were obtained from  
10  
11 210 parents/guardian and all adult participants provided their own consent. The study did not present any risk  
12  
13 211 of harm to subjects. No biological samples were collected. Minimum data was collected from  
14  
15 212 participants, whereby privacy and confidentiality of the data were ensured during the survey  
16  
17 213 implementation and data entry and management. Stakeholder meetings were conducted prior to, during,  
18  
19 214 and after the vaccination campaign to further disseminate the campaign plan and results to the community  
20  
21 215 members.  
22  
23  
24 216

## 26 217 **Results**

### 28 218 *OCV vaccination coverage*

30 219 The administrative coverage of the first and the second rounds of the campaign were 98.9% (194,581) and  
31  
32 220 98.8% (194,325) respectively based on the available census data of vaccination target population in  
33  
34 221 Cuamba Municipality and outskirts, estimated at around 196,652 (6) inhabitants (Table 1). A total of  
35  
36 222 194,581 people over one-year-old received the first dose, out of whom 99,275 were females and 122,592  
37  
38 223 were children aged less than 15 years. For the second round, total 194,325 people were vaccinated,  
39  
40 224 including 99,275 females and 120,169 children less than 15 years old. Notably, the vaccination coverage  
41  
42 225 survey conducted in the target community during each round and post-vaccination exhibited an  
43  
44 226 approximate coverage estimates of 75.9% (95 CI, 78.10 - 73.70%) for the first round and 68.5% (71.80 -  
45  
46 227 65.20%) for the second round. The coverage rate for the full two-doses was estimated at 60.4% (63.80 -  
47  
48 228 57.00%), whereby the coverage of children aged 1-4 years was around 64.4 % (57.10 – 71.10%) (Table  
49  
50 229 1). The coverage rates in each round were higher in male (76.3% and 77.8%) than female (75.4% and  
51  
52 230 67.7%), but coverage rate of full doses was higher in female (64.4%) than male (57.3%). No adverse  
53  
54  
55  
56  
57  
58  
59  
60

1  
2  
3 231 events were reported during and after the vaccination activities, monitored up to 14 days post-vaccination  
4

5 232 campaign.  
6

7 233  
8  
9  
10  
11  
12  
13  
14  
15  
16  
17  
18  
19  
20  
21  
22  
23  
24  
25  
26  
27  
28  
29  
30  
31  
32  
33  
34  
35  
36  
37  
38  
39  
40  
41  
42  
43  
44  
45  
46  
47  
48  
49  
50  
51  
52  
53  
54  
55  
56  
57  
58  
59  
60

For peer review only

234 **Table 1. OCV vaccination coverage estimates, Cuamba District, 2018**

235

236 **a) Administrative vaccination coverage rates**

237

|                                           |                   | Number of people vaccinated (No.) |               |               |               |               |               |               |
|-------------------------------------------|-------------------|-----------------------------------|---------------|---------------|---------------|---------------|---------------|---------------|
|                                           |                   | Day 1                             | Day 2         | Day 3         | Day 4         | Day 5         | Day 6         | Total         |
| <b>1<sup>st</sup> Dose</b>                | <b>Age (year)</b> |                                   |               |               |               |               |               |               |
| Individuals vaccinated per                | 1-4               | 6,493                             | 9,283         | 12,394        | 12,506        | 7,691         | -             | 48,367        |
| age group                                 | 5-15              | 7,050                             | 16,705        | 21,590        | 17,536        | 11,344        | -             | 74,225        |
|                                           | ≥15               | 10,136                            | 12,400        | 18,835        | 18,798        | 11,820        | -             | 71,989        |
| Total no. of daily vaccinated             |                   | 23,679                            | 38,388        | 52,819        | 48,840        | 30,855        | -             | 194,581       |
| Cumulative no. of vaccinated              |                   | 23,679                            | 62,067        | 114,886       | 163,726       | 194,581       | -             |               |
| <b>Cumulative administrative coverage</b> |                   | <b>12.04%</b>                     | <b>31.56%</b> | <b>58.42%</b> | <b>83.26%</b> | <b>98.95%</b> | -             | <b>98.95%</b> |
| <b>2<sup>nd</sup> Dose</b>                |                   |                                   |               |               |               |               |               |               |
| Individuals vaccinated per                | 1-4               | 5,479                             | 6,484         | 11,117        | 9,596         | 7,760         | 7,586         | 48,022        |
| age group                                 | 5-15              | 9,355                             | 8,796         | 15,679        | 13,208        | 14,444        | 10,665        | 72,147        |
|                                           | ≥15               | 9,416                             | 9,275         | 14,271        | 14,265        | 14,848        | 12,081        | 74,156        |
| Total no. of daily vaccinated             |                   | 24,250                            | 24,555        | 41,067        | 37,069        | 37,052        | 30,332        | 194,325       |
| Cumulative no. of vaccinated              |                   | 24,250                            | 48,805        | 89,872        | 126,941       | 163,993       | 194,325       |               |
| <b>Cumulative administrative coverage</b> |                   | <b>12.33%</b>                     | <b>24.82%</b> | <b>45.70%</b> | <b>64.55%</b> | <b>83.39%</b> | <b>98.82%</b> | <b>98.82%</b> |

238

239 **b) Vaccination coverage rates through coverage surveys**

240

|                        |        | First Round      | Second Round     | Full Two Doses   |
|------------------------|--------|------------------|------------------|------------------|
| <b>Age (years old)</b> | 1- 4   | 81.1±4.5%        | 72.2±6.9%        | 64.4±7.3%        |
|                        | 5-14   | 86.4±3.1%        | 71.3±5.8%        | 65.2±6.1%        |
|                        | ≥15    | 67.6±3.3%        | 65.2±4.8%        | 55.7±5.0%        |
| <b>Sex</b>             | Male   | 76.3±2.9%        | 77.8±3.9%        | 57.3±4.6%        |
|                        | Female | 75.4±3.2%        | 67.7±5.0%        | 64.4±5.1%        |
| <b>Total</b>           | -      | <b>75.9±2.2%</b> | <b>68.5±3.3%</b> | <b>60.4±3.4%</b> |

241



### 242 *Source of Information and Acceptability*

243 The source of information on the OCV vaccination campaign, identified by the populations living in the  
 244 vaccination target areas, showed use of megaphone as the most effective tool in disseminating  
 245 information on the vaccination plan and mobilizing the community to get immunized for both rounds:  
 246 24% and 34% at the first and second rounds respectively (Table 2). Around 15% of the surveyed people  
 247 in the target community indicated that they have learnt about the vaccination campaign through radio  
 248 broadcast for the first round, but its communication impact reduced in the second round (4%). This was  
 249 different for the community leaders, whose contribution increased from 5% in the first round to 19% in  
 250 the following round, reflecting their active engagement and communication efforts in close coordination  
 251 with the vaccination teams on the ground.

252

253 **Table 2. Source of information on OCV campaign, Cuamba District, 2018**

254

| Source of information | 1 <sup>st</sup> Round <sup>1</sup><br>N= 646<br>n (%=n/N) | 2 <sup>nd</sup> Round <sup>2</sup><br>N= 578<br>n (%=n/N) |
|-----------------------|-----------------------------------------------------------|-----------------------------------------------------------|
| Megaphone             | 152 (24%)                                                 | 195 (34%)                                                 |
| Family                | 60 (9%)                                                   | 53 (9%)                                                   |
| Radio                 | 96 (15%)                                                  | 23 (4%)                                                   |
| Religious leader      | 82 (13%)                                                  | 25 (4%)                                                   |
| Health workers        | 74 (11%)                                                  | 120 (21%)                                                 |
| Activists             | 55 (9%)                                                   | 9 (2%)                                                    |
| Community leader      | 33 (5%)                                                   | 108 (19%)                                                 |
| TV                    | 14 (2%)                                                   | 11 (2%)                                                   |
| Others <sup>3</sup>   | 78 (12%)                                                  | 33 (6%)                                                   |

255 Footnote:

256 <sup>1</sup> 1<sup>st</sup> round: 646 households/or people were interviewed.257 <sup>2</sup> 2<sup>nd</sup> round: 578 households/or people were interviewed.258 <sup>3</sup> Others included: list other source of info if such data were collected.

259

260

261 ***Reasons for not being vaccinated***

262 The unavailability (absence) of the target population for vaccination and incompatibility between working  
 263 hours and campaign schedule were commonly cited as barriers for vaccination in both the first (35%) and  
 264 the second round (51%) (Table 3). Absence of vaccinators at the vaccination sites were also mentioned,  
 265 12% and 18% for the first and second round respectively, despite the pre-vaccination planning and  
 266 programmatic organization. Notably, around 10% of the target population has indicated that they have not  
 267 been informed about the vaccination campaign even in the second round, though this was a reduction  
 268 compared to 18% in the first round. In order to address the most common barriers identified in the first  
 269 round, the second round of the vaccination campaign was further extended for additional few days  
 270 including the weekends, enabling more people to get vaccinated.

272 **Table 3. Reasons for non-vaccination during the OCV campaign, Cuamba District, 2018**

| Reasons for non-vaccination                             | 1 <sup>st</sup> Dose |     | 2 <sup>nd</sup> Dose |     |
|---------------------------------------------------------|----------------------|-----|----------------------|-----|
|                                                         | n=361                | %   | n=222                | %   |
| Unavailable                                             | 63                   | 17% | 96                   | 43% |
| Incompatibility between working hours and campaign time | 53                   | 15% | 18                   | 8%  |
| Vaccination post without vaccinator                     | 40                   | 11% | 41                   | 18% |
| Did not have information                                | 66                   | 18% | 23                   | 10% |
| Ill during the vaccination period                       | 30                   | 8%  | 10                   | 5%  |
| Does not believe in vaccine efficacy                    | 24                   | 7%  | 2                    | 1%  |
| Afraid of adverse events                                | 8                    | 2%  | 0                    | 0%  |
| Head of the family did not authorize                    | 4                    | 1%  | 2                    | 1%  |
| Religious leader forbid                                 | 2                    | 1%  | 0                    | 0%  |
| Considered not safe for pregnant women                  | 1                    | 0%  | 2                    | 1%  |
| Other                                                   | 70                   | 19% | 28                   | 13% |

1  
2  
3 275 ***OCV delivery costs***  
4

5 276 The total financial cost of campaign was US\$768,904 of which vaccine acquisition including vaccine  
6  
7 277 shipment constituted 69% (US\$533,659) (Table 4). The vaccine delivery costs including, microplanning,  
8  
9 278 training, communication, and social mobilization, vaccination implementation (Round 1 & 2) constituted  
10  
11 279 rest 31% (US\$235,245). The total financial cost per dose delivered was US\$0.60 without the vaccine cost  
12  
13 280 and US\$1.98 including the vaccine costs in 2018 price. The economic cost per dose delivered excluding  
14  
15 281 vaccine costs was five times higher at US\$3.02. The total financial cost of delivery per fully immunized  
16  
17 282 person excluding vaccine costs was US\$1.21.  
18  
19

20 283  
21  
22  
23  
24  
25  
26  
27  
28  
29  
30  
31  
32  
33  
34  
35  
36  
37  
38  
39  
40  
41  
42  
43  
44  
45  
46  
47  
48  
49  
50  
51  
52  
53  
54  
55  
56  
57  
58  
59  
60

284 **Table 4. Costs of OCV vaccine delivery and immunization in Cuamba District**

285

| <b>Vaccine Delivery Costs</b>                        | <b>Financial Cost<br/>(Mzn)</b> | <b>Economic Cost<br/>(Mzn)</b> | <b>Financial Cost<br/>(USD)</b> | <b>Economic Cost<br/>(USD)</b> |
|------------------------------------------------------|---------------------------------|--------------------------------|---------------------------------|--------------------------------|
| Vaccine Acquisition                                  | 32,179,644                      | 42,081,073                     | 533,659                         | 697,862                        |
| Microplanning                                        | 640,415                         | 7,596,625                      | 10,620                          | 125,981                        |
| Training                                             | 265,186                         | 299,419                        | 4,398                           | 4,965                          |
| Communication and Social Mobilization                | 1,912,520                       | 4,301,342                      | 31,717                          | 71,332                         |
| Vaccination Implementation (Round 1 &2)              | 11,367,160                      | 58,510,806                     | 188,510                         | 970,328                        |
| <b>Total</b>                                         | <b>46,364,925</b>               | <b>112,789,265</b>             | <b>768,904</b>                  | <b>1,870,469</b>               |
| <b>Immunization Costs</b>                            | <b>Financial Cost<br/>(Mzn)</b> | <b>Economic Cost<br/>(Mzn)</b> | <b>Financial Cost<br/>(USD)</b> | <b>Economic Cost<br/>(USD)</b> |
| Cost per Vaccine Administered (including vaccine)    | 119                             | 290                            | 1.98                            | 4.81                           |
| Cost per Vaccine Administered (without vaccine cost) | 36                              | 182                            | 0.60                            | 3.02                           |
| Cost per Partially Immunized Person                  | 238                             | 580                            | 3.95                            | 9.61                           |
| Cost per Fully Immunized Person (with vaccine)       | 239                             | 580                            | 3.96                            | 9.63                           |
| Cost per Fully Immunized Person (without vaccine)    | 73                              | 364                            | 1.21                            | 6.03                           |

286

## 287 Discussion

288 The OCV campaign in Cuamba District was organized without major logistical and programmatic  
289 challenges, and no adverse events were reported throughout the vaccination activities and up to 14 days  
290 after the campaign. Despite the similarity in the number of people vaccinated in the first and second  
291 rounds, the vaccination coverage survey of the second round showed lower coverage estimates than the  
292 first round. This may be due to possible cross border movement of people from untargeted districts to get  
293 vaccination during the second round. The vaccination coverage for the full two-doses was over 60% that  
294 may confer sufficient herd immunity for the following several years based on the existing literature on a  
295 cholera transmission model using the Matlab data from Bangladesh (10,11), which predicted 50%  
296 coverage with OCV in cholera endemic areas may result in 89% reduction in cholera cases in  
297 unvaccinated (12).

298  
299 In our study, children aged 5-14 years exhibited the highest coverage. This may be due to the vaccination  
300 posts in both schools (fixed vaccination post) and near homes (mobile vaccination posts), which  
301 facilitated the school-aged children to access the immunization health service more easily. The female  
302 group also presented higher full vaccination coverage rate compared to the male group, who showed  
303 higher drop-out after first dose, likely associated with their routine boundaries of livelihood near their  
304 houses or their child/children's schools as they take care of children while the male group typically work  
305 outside. This assumption is supported by the fact that the absence during the campaign was identified as a  
306 significant barrier against vaccination during both rounds of the campaign. Similar pattern was  
307 consistently prevalent in the previous OCV campaigns in Beira (13) and Nampula (4), whereby absence  
308 was the main barrier for vaccination. The second round of the campaign coincided with the period of  
309 school holidays when most households move to farming and food production, resulting in higher absence  
310 rate in the second round (43.0%) than in first round (17.0%). Further, it is encouraging to observe more  
311 than 60% vaccination coverage rate among children aged 1-4 years, the most at-risk population age-group  
312 concerning cholera outbreaks. Considering that caregivers for these younger children are mostly women,

1  
2  
3 313 higher vaccination coverage for these toddlers and younger children and women is as anticipated in  
4  
5 314 accordance with other studies published in similar settings (14).  
6  
7 315  
8  
9 316 In order to enhance the vaccination coverage, it is paramount to better understand the effective means of  
10  
11 317 communications for community sensitization and engagements, as well as barriers towards participating  
12  
13 318 in a vaccination program such as this campaign. Here, we showed that the use of megaphone proved to be  
14  
15 319 the most effective advocacy tool for disseminating information on the vaccination to our target  
16  
17 320 community, which may have allowed the field workers to reach out to families without access to other  
18  
19 321 sources of information. This may also indicate the need to better understand the inter-personnel  
20  
21 322 communication and community mobilization approach for future vaccination campaigns. For those with  
22  
23 323 missed opportunities to receive the OCV doses during the two rounds, a mop-up vaccination can be  
24  
25 324 considered, though it is often more laborious and costly, requiring a complex management (13). Further,  
26  
27 325 informing the public on the availability of a mop-up prior to or during the campaign may negatively affect  
28  
29 326 their participation in the regular vaccination schedule set-up. Hence, a mop-up was not considered after  
30  
31 327 the first round in our approach but pursued after the second round in order to enhance the full two-dose  
32  
33 328 vaccination and verify vaccination data records submitted during the regular program. Approximately  
34  
35 329 15.4% (32,775/212,824) of the delivered second doses were through this mop-up campaign indicative of  
36  
37 330 an effective strategy.  
38  
39  
40  
41 331

42  
43 332 The financial costs of OCV delivery per fully immunized person in this campaign was lower than delivery  
44  
45 333 costs reported in other African countries using the same CholTool (US\$1.8 in Shashemene district of  
46  
47 334 Ethiopia; US\$2.5 in Nsanje district of Malawi; and US\$3.5 in Machinga, Phalombe, and Zomba districts  
48  
49 335 of Malawi per the US\$ price value of 2016), but closer to that reported in Puri district of India (US\$1.14  
50  
51 336 per the US\$ price value of 2016) (9). One reason could be that Mozambique has experience of conducting  
52  
53 337 several OCV campaigns in recent years, and hence there were already resources and expertise available  
54  
55 338 for micro-planning, communication, sensitization, trainings etc., which might have reduced the costs  
56  
57  
58  
59

1  
2  
3 339 associated with introduction of vaccines in comparison to a vaccination program in naïve setting. The  
4  
5 340 financial cost of US\$0.60 per dose delivered (excluding vaccine procurement) is comparable to the  
6  
7 341 operational support ranging between US\$0.30 and US\$0.80 per person targeted for vaccination  
8  
9 342 campaigns, recommended by the Gavi, the Vaccine Alliance (15,16). This indicates the affordability of  
10  
11 343 OCV campaign in the current setting. To economize the healthcare provider time and efforts and  
12  
13 344 incentivize beneficiaries for greater uptake of vaccines, delivery of multiple products at vaccination posts  
14  
15 345 or on household visits may potentially synergize the delivery cost associated with vaccination campaigns.  
16  
17 346  
18  
19  
20 347 Overall, our study proved the feasibility of conducting a preemptive OCV mass vaccination campaign in a  
21  
22 348 rural and semi-rural setting in Cuamba District and Cuamba Municipality areas respectively, with  
23  
24 349 sufficient coverage rate and relatively lower delivery cost. The success of vaccination was a result of  
25  
26 350 effective coordination and microplanning among stakeholders despite some field challenges. The  
27  
28 351 vaccination strategy utilizing both fixed and mobile posts, as well as the daily feedback to the  
29  
30 352 coordination team on the preliminary coverage survey result and data related to barriers and source of  
31  
32 353 information on the vaccination campaign, proved valuable to prospectively refine the campaign and  
33  
34 354 mobilization strategy every day on a real-time basis.  
35

36  
37 355  
38  
39 356 However, there are several limitations. First, the operational challenges concerning poor road conditions  
40  
41 357 resulted in the accessibility to the target area difficult. Second, the programmatic support that required  
42  
43 358 sufficient and trained human resources and budget for a sustained field monitoring activity and close on-  
44  
45 359 site supervision prior to and during the vaccination campaign and coverage survey activities. Third, the  
46  
47 360 differences in the coverage rates of administrative data and survey result is due to the lack of accurate up-  
48  
49 361 to-date census data of local population. In addition, in order to avoid any conflict with the measles and  
50  
51 362 rubella national immunization campaign that was taking place across the country at the time of this  
52  
53 363 vaccination campaign, we had to delay our OCV vaccination campaign for about two months to obtain  
54  
55 364 support from immunization-related stakeholders, particularly the expanded programme of immunization  
56  
57  
58  
59  
60

365 (EPI) for cold chain space and logistics. Any mass vaccination campaigns should also consider  
366 seasonality and other major community activities and/or any political issues.

367

### 368 **Acknowledgement**

369 The authors acknowledge the local government officials and healthcare professionals in Cuamba District,  
370 Niassa Province for engaging the community on the OCV vaccination program throughout the planning  
371 and implementation period. Thanks are also extended to the people who consented and took part in the  
372 coverage survey. We thank our research partners and staff at the MOCA sentinel site networks in  
373 Mozambique, and Ms. Somyoung Cho for the project management and Ms. Jihyun Han and Ms. Nozipho  
374 Manjate for the project administrative support.

375

### 376 **Contributorship**

377 S.E.P conceptualized the overall study design of the Mozambique Cholera Prevention and Surveillance  
378 (MOCA) project. C.S.B. supervised the MOCA project in Mozambique. N.S.B. supervised the overall  
379 vaccination campaign and monitoring and evaluation. All authors participated in the vaccination  
380 campaign. J.C., N.L., L.D.B., J.P.L., N.S.B., S.E.P., S.A., A.O., M.M., and the project field team in  
381 Cuamba and Niassa contributed to data acquisition on the community vaccination coverage surveys, and  
382 interpretation of results under the supervision of N.S.B. R.B.J.M., J.A.M., S.A., A.O., M.M., and others in  
383 the vaccination teams of Cuamba District and Niassa Province contributed to acquisition, review, and  
384 report of the administrative coverage data. I.C. contributed to data acquisition and analysis on vaccination  
385 costs; and V.M. and C.V.R. reviewed the cost analysis. J.C. drafted and edited the paper under the  
386 scientific guidance from N.S.B. and S.E.P. All authors read and approved the final draft.

387

### 388 **Funding Statement**

389 This study was supported by the Korea International Cooperation Agency (KOICA), government of the  
390 Republic of Korea. The findings and conclusions are our own and do not necessarily reflect positions of



1  
2  
3 391 the KOICA. The International Vaccine Institute acknowledges its donors, including the Government of  
4  
5 392 Republic of Korea and the Swedish International Development Cooperation Agency (SIDA).  
6

7 393

### 9 394 **Competing of Interests**

11 395 The authors declare no competing interests.  
12

13 396

### 16 397 **Ethics approval**

17  
18 398 Institutional Ethical Committee of the National Institute of Health (Ref: 116/CNBS/19) and ethical review  
19  
20 399 board of the International Vaccine Institute, Seoul, Korea (IRB number 2017-006) approved the study  
21  
22 400 protocol for the OCV mass vaccination campaign monitoring and coverage survey.  
23

24 401

### 26 402 **Data sharing**

28 403 All data relevant to the study are included in the article.  
29

30 404

### 32 405 **Figure legends**

34 406

#### 37 407 **Figure 1. Pre-emptive OCV mass vaccination site**

38 408

39  
40 409 Location of the pre-emptive OCV vaccination campaign site in Cuamba District, Mozambique, included  
41  
42 410 bairros and povoados in the municipality and district.  
43

44 411

### 47 412 **References**

- 48  
49 413 1. Chun-Hai Fung I, Fitter DL, Borse RH, Meltzer MI, Tappero JW. **Modeling the Effect of Water,**  
50  
51 414 **Sanitation, and Hygiene and Oral Cholera Vaccine Implementation in Haiti.** Am J Trop Med  
52  
53 415 Hyg. 2013 Oct 9;89(4):633–40.  
54  
55  
56  
57  
58

- 1  
2  
3 416 2. Langa JP, Sema C, De Deus N, Colombo MM, Taviani E. **Epidemic waves of cholera in the last**  
4  
5 417 **two decades in Mozambique.** J Infect Dev Ctries [Internet]. 2015 Jul 4 [cited 2015 Oct 5];9(06).  
6  
7 418 Available from: <http://www.jidc.org/index.php/journal/article/view/6943>  
8  
9 419 3. WHO. 2013. **Cholera country profile: Mozambique.** Global Task Force on Cholera Control.  
10  
11 420 4. Semá Baltazar C, Rafael F, Langa JPM, Chicumbe S, Cavailler P, Gessner BD, *et al.* **Oral cholera**  
12 **vaccine coverage during a preventive door-to-door mass vaccination campaign in Nampula,**  
13 **Mozambique.** PloS One. 2018;13(10): e0198592.  
14 421  
15 422  
16 423 5. WHO. **Cholera vaccines: WHO position paper –August 2017.** Wkly Epidemiol Rec.  
17  
18 424 2017;92(34):477–498  
19  
20 425 6. Instituto Nacional de Estatística (INE). 2017. **IV Recenseamento Geral da População e Habitação.**  
21  
22 426 **Divulgação os resultados preliminares IV RGPH 2017: Habitação, agregados familiares e**  
23 **população, Província de Niassa, p. 3.**  
24 427  
25 428 7. Gujral L, Sema C, Rebaudet S, Taibo CLA, Manjate AA, Piarroux R, *et al.* **Cholera epidemiology**  
26 **in Mozambique using national surveillance data.** J Infect Dis. 2013 Nov 1;208 Suppl 1:S107-114.  
27 429  
28 430 8. Instituto Nacional de Estatística (INE). 2007. **Recenseamento Geral da População e Habitação**  
29 **2007: Indicadores Sócio Demográficos, Província de Niassa, p. 63.**  
30 431  
31 432 9. Morgan, W. *et al.* (2020). **Costing oral cholera vaccine delivery using a generic oral cholera**  
32 **vaccine delivery planning and costing tool (CholTool).** *Human Vaccines and Immunotherapeutics.*  
33 433 Taylor & Francis, 16(12), pp. 3111–3118. doi: 10.1080/21645515.2020.1747930.  
34 434  
35 435 10. Clemens JD, Sack DA, Harris JR, Chakraborty J, Khan MR, *et al.* (1986). **Field trial of oral**  
36 **cholera vaccines in Bangladesh.** Lancet 2: 124–127.  
37 436  
38 437 11. Clemens JD, Sack DA, Harris JR, Van Loon F, Chakraborty J, *et al.* (1990) **Field trial of oral**  
39 **cholera vaccines in Bangladesh: Results from three-year follow-up.** Lancet 335: 270–273.  
40 438  
41 439 12. Longini IM, Nizam A, Ali M, Yunus M, Shenvi N. (2007). **Controlling endemic cholera with**  
42 **oral vaccines.** PLoS Med 4: e336. doi:10.1371/ journal. pmed.0040336.  
43 440  
44  
45  
46  
47  
48  
49  
50  
51  
52  
53  
54  
55  
56  
57  
58  
59  
60

- 1  
2  
3 441 13. Lucas ME, Deen JL, von Seidlein L, Wang X-Y, Ampuero J, Puri M, *et al*. **Effectiveness of mass**  
4  
5 442 **oral cholera vaccination in Beira, Mozambique.** N Engl J Med. 2005;352(8):757–767.  
6  
7 443 14. D. Legros, C. Paquet, W. Perea, I. Marty, N. Kenya Mugisha, H. Royer, M. Neira, & B. Ivanoff.  
8  
9 444 1999. **Mass vaccination with a two-dose oral cholera vaccine in a refugee camp in Sudan,**  
10  
11 445 **Uganda.** Bulletin of the World Health Organization, 77(10).  
12  
13 446 15. Gavi, the Vaccine Alliance. Vaccine introduction grants and operational support  
14  
15 447 for campaigns. Report to the GAVI Alliance Board. 12-13 June 2012. Available at:  
16  
17 448 [https://www.gavi.org/sites/default/files/board/minutes/2012/12-june/13%20-](https://www.gavi.org/sites/default/files/board/minutes/2012/12-june/13%20-%20Vaccine%20introduction%20grants%20and%20operation%20support%20for%20campaigns%20document.pdf)  
18  
19 449 [%20Vaccine%20introduction%20grants%20and%20operation%20support%20for%20campaigns%20document.pdf](https://www.gavi.org/sites/default/files/board/minutes/2012/12-june/13%20-%20Vaccine%20introduction%20grants%20and%20operation%20support%20for%20campaigns%20document.pdf) (Accessed on 9 February, 2021).  
20  
21 450  
22  
23 451 16. Gavi, the Vaccine Alliance. GAVI Alliance Board Meeting. 12-13 June 2012, Washington, DC,  
24  
25 452 USA, Final Minutes. Available at:  
26  
27 453 [https://www.gavi.org/sites/default/files/board/minutes/2012/Board-2012-Mtg-02%20-](https://www.gavi.org/sites/default/files/board/minutes/2012/Board-2012-Mtg-02%20-%20Minutes.pdf)  
28  
29 454 [%20Minutes.pdf](https://www.gavi.org/sites/default/files/board/minutes/2012/Board-2012-Mtg-02%20-%20Minutes.pdf) (Accessed on 9 February, 2021).  
30  
31  
32  
33 455

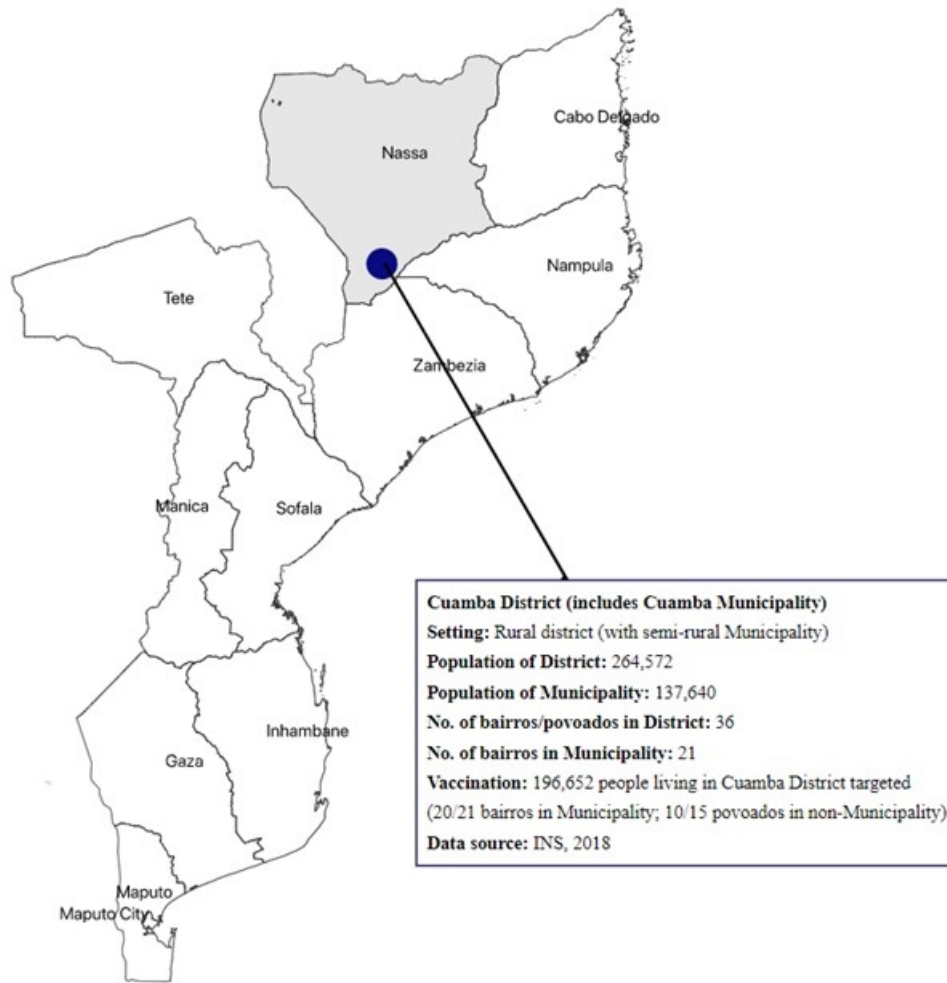

Figure 1. Pre-emptive OCV mass vaccination site

Figure 1. Pre-emptive OCV mass vaccination site

Location of the pre-emptive OCV vaccination campaign site in Cuamba District, Mozambique, included bairros and povoados in the municipality and district.

165x181mm (96 x 96 DPI)

# BMJ Open

## A pre-emptive Oral Cholera Vaccine (OCV) mass vaccination campaign in Cuamba District, Niassa Province, Mozambique: feasibility, vaccination coverage, and delivery costs using CholTool

|                                 |                                                                                                                                                                                                                                                                                                                                                                                                                                                                                                                                                                                                                                                                                                                                                                                                                                                                                                                                                                                                                                                                                                                             |
|---------------------------------|-----------------------------------------------------------------------------------------------------------------------------------------------------------------------------------------------------------------------------------------------------------------------------------------------------------------------------------------------------------------------------------------------------------------------------------------------------------------------------------------------------------------------------------------------------------------------------------------------------------------------------------------------------------------------------------------------------------------------------------------------------------------------------------------------------------------------------------------------------------------------------------------------------------------------------------------------------------------------------------------------------------------------------------------------------------------------------------------------------------------------------|
| Journal:                        | <i>BMJ Open</i>                                                                                                                                                                                                                                                                                                                                                                                                                                                                                                                                                                                                                                                                                                                                                                                                                                                                                                                                                                                                                                                                                                             |
| Manuscript ID                   | bmjopen-2021-053585.R2                                                                                                                                                                                                                                                                                                                                                                                                                                                                                                                                                                                                                                                                                                                                                                                                                                                                                                                                                                                                                                                                                                      |
| Article Type:                   | Original research                                                                                                                                                                                                                                                                                                                                                                                                                                                                                                                                                                                                                                                                                                                                                                                                                                                                                                                                                                                                                                                                                                           |
| Date Submitted by the Author:   | 08-Apr-2022                                                                                                                                                                                                                                                                                                                                                                                                                                                                                                                                                                                                                                                                                                                                                                                                                                                                                                                                                                                                                                                                                                                 |
| Complete List of Authors:       | Elias Chitio, Jucunú J.; National Institute of Health<br>Baltazar, Cynthia; National Institute of Health<br>Langa, José Paulo; National Institute of Health<br>Baloi, Liliana Dengo; National Institute of Health<br>Mboane, Ramos B. J.; Provincial Directorate of Health, Provincial Directorate of Health<br>Manuel, José Alberto; Provincial Directorate of Health, Provincial Directorate of Health<br>Assane, Sadate; Provincial Directorate of Health, Provincial Directorate of Health<br>Omar, Alide; District Health Directorate, District Health Directorate<br>Manso, Mariana; District Health Directorate, District Health Directorate<br>Capitine, Igor; National Institute of Health<br>Van Rensburg, Craig; International Vaccine Institute<br>Luiz, Naira; National Institute of Health; International Vaccine Institute<br>Mogasale, Vittal; International Vaccine Institute, Policy and Economic Research<br>Marks, Florian ; International Vaccine Institute<br>Park, Se Eun; International Vaccine Institute; Yonsei University<br>Beck, Namseon; International Vaccine Institute; Medair Headquarters |
| <b>Primary Subject Heading</b>: | Global health                                                                                                                                                                                                                                                                                                                                                                                                                                                                                                                                                                                                                                                                                                                                                                                                                                                                                                                                                                                                                                                                                                               |
| Secondary Subject Heading:      | Infectious diseases, Health economics, Global health, Health policy                                                                                                                                                                                                                                                                                                                                                                                                                                                                                                                                                                                                                                                                                                                                                                                                                                                                                                                                                                                                                                                         |
| Keywords:                       | PUBLIC HEALTH, HEALTH ECONOMICS, INFECTIOUS DISEASES, PREVENTIVE MEDICINE, Infection control < INFECTIOUS DISEASES                                                                                                                                                                                                                                                                                                                                                                                                                                                                                                                                                                                                                                                                                                                                                                                                                                                                                                                                                                                                          |
|                                 |                                                                                                                                                                                                                                                                                                                                                                                                                                                                                                                                                                                                                                                                                                                                                                                                                                                                                                                                                                                                                                                                                                                             |

SCHOLARONE™  
Manuscripts



I, the Submitting Author has the right to grant and does grant on behalf of all authors of the Work (as defined in the below author licence), an exclusive licence and/or a non-exclusive licence for contributions from authors who are: i) UK Crown employees; ii) where BMJ has agreed a CC-BY licence shall apply, and/or iii) in accordance with the terms applicable for US Federal Government officers or employees acting as part of their official duties; on a worldwide, perpetual, irrevocable, royalty-free basis to BMJ Publishing Group Ltd ("BMJ") its licensees and where the relevant Journal is co-owned by BMJ to the co-owners of the Journal, to publish the Work in this journal and any other BMJ products and to exploit all rights, as set out in our [licence](#).

The Submitting Author accepts and understands that any supply made under these terms is made by BMJ to the Submitting Author unless you are acting as an employee on behalf of your employer or a postgraduate student of an affiliated institution which is paying any applicable article publishing charge ("APC") for Open Access articles. Where the Submitting Author wishes to make the Work available on an Open Access basis (and intends to pay the relevant APC), the terms of reuse of such Open Access shall be governed by a Creative Commons licence – details of these licences and which [Creative Commons](#) licence will apply to this Work are set out in our licence referred to above.

Other than as permitted in any relevant BMJ Author's Self Archiving Policies, I confirm this Work has not been accepted for publication elsewhere, is not being considered for publication elsewhere and does not duplicate material already published. I confirm all authors consent to publication of this Work and authorise the granting of this licence.

1  
2  
3 1 **A pre-emptive Oral Cholera Vaccine (OCV) mass vaccination campaign in Cuamba District, Niassa**  
4  
5 2 **Province, Mozambique: feasibility, vaccination coverage, and delivery costs using CholTool**  
6  
7 3

8  
9 4 Jucunú J. Elias Chitio<sup>1</sup>, Cynthia Semá Baltazar<sup>1</sup>, José Paulo Langa<sup>1</sup>, Liliana Dengo Baloi<sup>1</sup>, Ramos B. J.  
10 5 Mboane<sup>2</sup>, José Alberto Manuel<sup>2</sup>, Sadate Assane<sup>2</sup>, Alide Omar<sup>3</sup>, Mariana Manso<sup>3</sup>, Igor Capatine<sup>1</sup>, Craig  
11 6 Van Rensburg<sup>4</sup>, Naira Luiz<sup>1,4</sup>, Vittal Mogasale<sup>4</sup>, Florian Marks<sup>4,5</sup>, Se Eun Park<sup>4,6,#</sup> and Namseon Beck<sup>4,7</sup>  
12  
13  
14  
15  
16  
17

18 8 <sup>1</sup> National Institute of Health, Maputo, Mozambique

19  
20 9 <sup>2</sup> Provincial Health Directorate, Niassa, Mozambique

21  
22 10 <sup>3</sup> District Health Directorate, Cuamba, Mozambique

23  
24 11 <sup>4</sup> International Vaccine Institute, SNU Research Park, 1 Gwanak-ro, 1 Gwanak-gu, Seoul, 08826,  
25 12 Republic of Korea

26  
27 13 <sup>5</sup> The Department of Medicine, The University of Cambridge, United Kingdom

28  
29 14 <sup>6</sup> Graduate School of Public Health, Yonsei University, 50 Yonsei-ro, Seodaemun-gu, Seoul, 03722,  
30 15 Republic of Korea

31  
32 16 <sup>7</sup> MEDAIR, Switzerland  
33  
34  
35  
36  
37  
38

39 18 # Corresponding author:

40  
41 19 Se Eun Park, PhD; International Vaccine Institute, 1 Gwanak-ro, 1 Gwanak-gu, Seoul, 151-742; Republic  
42 20 of Korea; T: +82-2-881-1154; Email: SeEun.Park@ivi.int  
43  
44  
45  
46  
47  
48  
49  
50  
51  
52  
53  
54  
55  
56  
57  
58  
59  
60

1  
2  
3 **22 Abstract**  
4  
5  
6 **23**

7 **24 Introduction:** Mozambique suffers from regular floods along its principal river basins and periodic  
8  
9  
10  
11  
12  
13  
14  
15  
16  
17  
18  
19  
20  
21  
22  
23  
24  
25  
26  
27  
28  
29  
30  
31  
32  
33  
34  
35  
36  
37  
38  
39  
40  
41  
42  
43  
44  
45  
46  
47  
48  
49  
50  
51  
52  
53  
54  
55  
56  
57  
58  
59  
60  
**25** cyclones that resulted in several cholera epidemics during the last decades. Cholera outbreaks in the  
**26** recent five years affected particularly the northern provinces of the country including Nampula and  
**27** Niassa provinces. A pre-emptive Oral Cholera Vaccine (OCV) mass vaccination campaign was conducted  
**28** in Cuamba District, Niassa Province, and the feasibility, costs, and vaccination coverage assessed.

**30 Methods:** World Health Organization prequalified OCV (Euvichol-Plus), a killed whole-cell bivalent  
**31** vaccine containing *Vibrio cholerae* O1 (classical and El Tor) and O139, was administered in two-doses  
**32** with a 15-day interval during 7-31 August 2018, targeting around 180,000 people aged above one year in  
**33** Cuamba District. Microplanning, community sensitization, and trainings of local public health  
**34** professionals and field enumerators were conducted. Feasibility and costs of vaccination were assessed  
**35** using CholTool. Vaccination coverage and barriers were assessed through community surveys.

**37 Results:** The administrative coverage of the first and second rounds of the campaign were 98.9%  
**38** (194,581) and 98.8% (194,325) respectively based on the available population data that estimated total  
**39** 196,652 inhabitants in the target area. The vaccination coverage survey exhibited 75.9% ( $\pm 2.2\%$ ) and  
**40** 68.5% ( $\pm 3.3\%$ ) coverages for the first and second rounds, respectively. Overall, 60.4% ( $\pm 3.4\%$ ) of the  
**41** target population received full two-doses of OCV. Barriers to vaccination included incompatibility  
**42** between working hours and campaign time. No severe adverse events were notified. The total financial  
**43** cost per dose delivered was US\$0.60 without vaccine cost and US\$1.98 including vaccine costs.

**45 Conclusion:** The pre-emptive OCV mass vaccination campaign in remote setting in Mozambique was  
**46** feasible with reasonable full-dose vaccination coverage to confer sufficient herd immunity for at least the



1  
2  
3 47 next three to five years. The delivery cost estimate indicates that the OCV campaign is affordable as it is  
4  
5 48 comparable to Gavi's operational support for vaccination campaigns.  
6

7 49

9 50 **Key words:** Cholera, OCV, pre-emptive vaccination, Cuamba, Mozambique, vaccination coverage  
11 51 survey, feasibility, vaccination cost  
12  
13  
14  
15  
16  
17  
18  
19  
20  
21  
22  
23  
24  
25  
26  
27  
28  
29  
30  
31  
32  
33  
34  
35  
36  
37  
38  
39  
40  
41  
42  
43  
44  
45  
46  
47  
48  
49  
50  
51

For peer review only

## 52 **Strengths and limitations of this study**

- 53 • This study has successfully demonstrated the feasibility of an OCV mass vaccination campaign in a  
54 remote setting in Mozambique.
- 55 • The cost of a mass vaccination campaign for the two-dose OCV administrations has been analysed for  
56 the first time in Mozambique, which can serve as a reference cost estimate when planning for any  
57 OCV vaccination programs in a similar setting in Mozambique or other countries.
- 58 • Vaccination coverage estimates may be affected if there are people movements in and out of the study  
59 area. A sub-study on this and a focused community engagement strategy to reduce the identified  
60 barriers to vaccination should be considered in future vaccination programs.
- 61 • Newly introduced vaccination monitoring/coverage survey engaging the same survey team enabled  
62 quick availability of the vaccination coverage during or immediately after the campaign, but at the  
63 same time the team could be overburdened.

## 65 **Introduction**

66 Cholera is a vaccine preventable disease that remains as a major public health concern in many parts of  
67 low- and middle-income countries (LMICs). A comprehensive policy measure is warranted to control and  
68 prevent cholera including investments in improving infrastructure and knowledge, attitude, and behavior  
69 associated with water, sanitation, and hygiene (WASH), strengthening health system, and adequate use of  
70 oral cholera vaccine (OCV) (1). In Mozambique, cholera has been endemic since the early 1970's when  
71 the first cholera outbreak was reported in the country. Several epidemics followed since then including  
72 the outbreaks in 1997-1999 and 2012-2016 (2, 3). Cholera outbreaks are more frequent in the country's  
73 northern provinces including Nampula, Cabo Delgado, Tete, and Niassa (4). Following the reinforcement  
74 of cholera outbreak response strategies, the Ministry of Health (MOH) of Mozambique has carried out  
75 several OCV mass vaccination campaigns, as recommended by the World Health Organization (WHO) as  
76 an integral part of a comprehensive strategy for cholera prevention and control in endemic setting along

1  
2  
3 77 with primary interventions of WaSH measures (5): Recent cholera outbreaks in these cholera endemic and  
4  
5 78 hotspot areas in December 2015 resulted in the use of global OCV emergency stockpile to vaccinate  
6  
7 79 approximately 212,745 people living in six neighborhoods of Nampula city in 2016 (4); and in April  
8  
9 80 2017, another 709,077 doses from the stockpile to vaccinate approximately 354,550 people in Tete City  
10  
11 81 and Moatize and Mutarara districts, in response to the cholera outbreak with over 3,592 cholera cases.  
12

13  
14 82  
15  
16 83 In addition to these reactive vaccination campaigns supported by the WHO International Coordinating  
17  
18 84 Group (ICG) on vaccine provision for cholera, a growing need for a preventive public health intervention  
19  
20 85 using a targeted vaccination approach in cholera priority areas in-country was identified. The past records  
21  
22 86 of numerous episodes of cholera epidemics in Mozambique have spotted at-risk districts in the most  
23  
24 87 cholera endemic provinces such as Nampula (particularly Nampula City), Niassa (Lichinga city and  
25  
26 88 Cuamba and Lago Districts), and Cabo Delgado (Pemba City and Ancuabe District), and to a lesser  
27  
28 89 degree, other provinces and districts with limited sanitary conditions (5). Niassa province, one of the  
29  
30 90 cholera endemic regions with annual cholera outbreaks affecting largely the Lichinga City and Lago and  
31  
32 91 Cuamba Districts, was identified for a planned pre-emptive vaccine introduction to prevent subsequent  
33  
34 92 cholera outbreaks. Cuamba District with an estimated population of 264,572 (6), reports over 200  
35  
36 93 suspected cholera and 2,000 diarrheal cases almost every year, with an exception of 2014 and 2016 (7).  
37  
38 94 Here, we describe the feasibility, costs, and coverage estimates associated with a pre-emptive OCV mass  
39  
40 95 vaccination campaign conducted in Cuamba District using two-dose OCVs (Euvichol-Plus) administered  
41  
42 96 to approximately 180,000 people with a 15-day interval between the doses, as well as challenges of  
43  
44 97 delivering healthcare in resource limited rural setting in Mozambique.  
45  
46 98

## 99 **Methods**

100

### 101 ***Study site and population***

1  
2  
3 102 The Cuamba District is located in Niassa Province with a population size of around 264,572 (6). The site  
4  
5 103 was selected for a pre-emptive OCV mass vaccination campaign as the district includes the Cuamba  
6  
7 104 Municipality area where cholera is found to be endemic with periodic outbreaks. The area was also  
8  
9 105 highlighted by the WHO as one of the priority sites to consider for a potential OCV intervention during a  
10  
11 106 needs-assessment performed in September 2015 (1). The District of Cuamba is composed of a total 36  
12  
13 107 bairros and povoados with population size of approximately 264,572 (6), which includes 21 bairros in the  
14  
15 108 Cuamba Municipality area with around 137,640 residents (8). In total, approximately 180,000 individuals  
16  
17 109 living in Cuamba District was targeted initially, and ultimately around 196,652 people living in Cuamba  
18  
19 110 District were targeted, which included 20 Bairros in the Municipality area and 10 Povoados in the  
20  
21 111 outskirts of the Municipality area (Figure 1). Selection of bairros and povoados in the outskirts of  
22  
23 112 Cuamba Municipality within the District was made not only based on the high number of doses destined  
24  
25 113 for the target population in the municipality area, but also the records of cholera cases during the  
26  
27 114 outbreaks. Everyone above one year of age were eligible for the two-dose OCV administration.  
28  
29  
30  
31  
32

### 33 116 ***Vaccine delivery, storage, and handling***

34  
35 117 Approximately 360,000 doses of WHO pre-qualified Euvichol-Plus, a killed whole-cell bivalent OCV  
36  
37 118 containing *Vibrio cholerae* O1 (classical and El Tor) and O139, were procured from the manufacturer  
38  
39 119 (EuBiologics) and shipped to the entry port in Pemba, Mozambique in cold-chain. Upon arrival in  
40  
41 120 Mozambique, the vaccines were delivered to Lichinga by airfreight and transported to a central vaccine  
42  
43 121 storage room in Cuamba project site, and kept in refrigerators with temperature maintained within range  
44  
45 122 between 2-8°C until and throughout the campaign. The vaccine vial monitor (VVM) and electronic  
46  
47 123 shipping indicators (Q-Tag) were used to monitor the temperature of the vaccines during delivery,  
48  
49 124 storage, and handling. During the vaccination campaign, cool boxes with dry ice maintained within 2-8°C  
50  
51  
52 125 were used to carry the vaccines to the vaccination posts.  
53  
54  
55  
56  
57  
58  
59  
60

### 127 ***Cost of vaccine delivery***

128 An openly available, standardized and validated Excel-based tool known as the CholTool was used for  
129 estimating vaccine delivery costs (9). This tool comprehensively estimates programmatic costs such as  
130 microplanning, communication and training materials development, sensitization/social mobilization, and  
131 personnel training, as well as costs related to vaccine delivery such as vaccine procurement, handling,  
132 storage, and transport, vaccination administration, adverse events following immunization (AEFI)  
133 management, monitoring supervision, and field support. The CholTool has the ability to estimate both  
134 financial and economic costs. Financial costs refer to the monetary costs to the payer (e.g., allowances,  
135 supplies, transport, and resources used in micro-planning, training, and sensitization/social mobilization)  
136 while economic costs include financial costs along with non-monetary costs of donated goods and  
137 resources already available (e.g., health personnel time). Key informant interviews were conducted at  
138 various administrative levels before, during and after the vaccination campaign in order to identify the  
139 resources necessary for each vaccination related activity and costs of respective resources for each of the  
140 two rounds of vaccination. The resource and cost data were entered in CholTool which auto-calculates  
141 OCV delivery costs. The costs were reported in 2018 in United States Dollars (US\$) based on  
142 government and payer perspective.

### 144 ***Vaccination Strategy and microplanning***

145 A fixed post vaccination strategy with additional mobile teams was adapted for the microplanning of the  
146 vaccination campaign. The vaccination teams for 15 fixed posts and 33 mobile teams were identified and  
147 trained prior to the campaign. The fixed posts included existing healthcare facilities such as primary  
148 health centers and secondary and referral hospital, schools, market areas where many people have easy  
149 access to. The mobile teams were deployed to households remotely located with limited access to these  
150 fixed posts. This adopted mixed vaccination strategy aimed to improve quality, accessibility, and  
151 coverage. Each post was staffed with around 5 field workers including 2 health workers and 3 community  
152 engagement workers. Five days prior to the vaccination campaign, micro-plans for each cluster were

1  
2  
3 153 prepared with postal addresses, target populations, vaccination dates, teams, and other site-specific  
4  
5 154 resources. The health workers obtained verbal informed consents from the individuals visiting the  
6  
7 155 vaccination posts for the OCV administration. Pregnant women by self-report or infants below one year  
8  
9 156 old were excluded from the vaccination. Vaccination cards and vaccination registry book were developed  
10  
11 157 and deployed, specific to this vaccination that included variables such as name, age, address, and  
12  
13 158 vaccination date. The collected data in the vaccine registry book were entered in an excel-based database.  
14  
15 159 The number of doses planned and administered were also recorded daily for each rounds of the  
16  
17 160 vaccination campaign.  
18  
19  
20  
21

### 22 162 ***Vaccination, adverse event monitoring, and coverage estimate***

23  
24 163 The vaccination campaign occurred in two rounds with a 15-day interval. The first round took place  
25  
26 164 during August 7-11, followed by the second round during August 27–31, 2018. Provision was made for  
27  
28 165 mop-up activities after the second round for those who missed the second dose. To detect any possible  
29  
30 166 adverse events following immunization (AEFI) during and after the campaign, health workers were  
31  
32 167 trained to monitor and notify any adverse events encountered in inpatient and outpatient admissions at  
33  
34 168 Cuamba health facilities from the first day of each round throughout the 15 days after the last day of each  
35  
36 169 round.  
37  
38  
39  
40

41 171 The vaccination coverage estimates were assessed in two-folds; administrative coverage and coverage  
42  
43 172 surveys. The administrative coverage was recorded by the local government health office in charge of the  
44  
45 173 vaccination campaign by tracking the number of vaccine doses administered compared to doses that had  
46  
47 174 been planned in the vaccination target areas, at the end of vaccination activities every day during the two  
48  
49 175 rounds of the OCV vaccination campaign. For the vaccination coverage surveys, around 520-650  
50  
51 176 households, subject to the vaccination schedule including the mop-up vaccination, were estimated to  
52  
53 177 ensure more than 550 samples for each age group (1-4 years, 5-14 years, 15 years and above) assuming  
54  
55 178 80% coverage with a design effect of 2 to achieve around 5% of prevision. Sampled households were  
56  
57  
58  
59  
60

1  
2  
3 179 organized per cluster; total 20-25 clusters with 26 households per cluster. The households were selected  
4  
5 180 using a two-stage cluster random sampling methodology. Clusters (primary sampling unit) were selected  
6  
7 181 from the list of villages in the Health Zones, according to the Probability Proportional to Population Size  
8  
9 182 (PPS) and households (secondary sampling unit) were chosen randomly. For the household random  
10  
11 183 sampling, the enumerators identified the center point and boundary of the survey target area and applied  
12  
13 184 random selection of households. The surveyors were recruited based on their knowledge on the local area  
14  
15 185 and level of education to conduct the survey, and trained on household sampling methodology, structured  
16  
17 186 survey questionnaire, and process of conducting a survey interview, including verbal informed consent  
18  
19  
20 187 and data capturing on the paper-based survey questionnaires.  
21  
22 188

23  
24 189 Over the period of the OCV vaccination campaign, five survey teams were deployed to the predetermined  
25  
26 190 clusters for daily vaccination monitoring, where randomly identified 26 households per cluster (5 clusters  
27  
28 191 with total 130 households per day) were visited for 4-5 days (total 520-650 households) from the second  
29  
30 192 or third day of the campaign until one day after the last vaccination day. This was applied for each round  
31  
32 193 of the two-dose OCV vaccination campaigns. The information gathered through the survey on the vaccine  
33  
34 194 uptake in the previous day, barriers against the vaccination, and the information source on the campaign  
35  
36 195 were analyzed and fed daily to the vaccination campaign coordinators and supervisors in order to  
37  
38 196 facilitate overall vaccine uptakes. During the second round of campaign, the survey team collected data  
39  
40 197 for the first round coverage using the same questionnaire for monitoring, which enabled the first-round  
41  
42 198 vaccine coverage available before the completion of the second round. After the second round, the  
43  
44 199 enumerators continued the household survey for additional three days (total four days, including the last  
45  
46 200 survey day for monitoring of the second round, which was one day after the mop-up campaign) to  
47  
48 201 estimate the coverage for the second round and two full doses of vaccination.  
49  
50

51 202

### 52 53 203 ***Patient and Public Involvement***

1  
2  
3 204 The vaccination campaign was conducted as a part of the government's public health intervention,  
4  
5 205 approved by the Ministry of Health (MOH) in Mozambique. The participants in this study were people  
6  
7 206 living in the cholera endemic and hotspot area, targeted for OCV vaccination campaign as an integral part  
8  
9 207 of the government's cholera prevention efforts. The vaccination target population living in Cuamba  
10  
11 208 District were sensitized and engaged, prior to and during the vaccination campaign, by the district and  
12  
13 209 provincial health officials, study team that included the MOH and National Institute of Health  
14  
15 210 government officials, and local public health professionals at healthcare facilities. The participants were  
16  
17 211 provided with information on the planned OCV mass vaccination such as the purpose of pre-emptive  
18  
19 212 vaccination and detailed information on where and when the vaccination campaigns were to take place.  
20  
21 213 The vaccination campaign was also announced through various press and social media in Mozambique  
22  
23 214 for public awareness and involvement. The study was conducted in a transparent manner with open  
24  
25 215 communication and information sharing in the community, and participants to the OCV vaccination and  
26  
27 216 vaccination coverage surveys were informed for oral consent. For children, consents were obtained from  
28  
29 217 parents/guardian and all adult participants provided their own consent. The study did not present any risk  
30  
31 218 of harm to subjects. No biological samples were collected. Minimum data was collected from  
32  
33 219 participants, whereby privacy and confidentiality of the data were ensured during the survey  
34  
35 220 implementation and data entry and management. Stakeholder meetings were conducted prior to, during,  
36  
37 221 and after the vaccination campaign to further disseminate the campaign plan and results to the community  
38  
39 222 members.  
40  
41  
42  
43  
44

## 45 224 **Results**

### 46 225 *OCV vaccination coverage*

47  
48  
49 226 The administrative coverage of the first and the second rounds of the campaign were 98.9% (194,581) and  
50  
51 227 98.8% (194,325) respectively based on the available census data of vaccination target population in  
52  
53 228 Cuamba Municipality and outskirts, estimated at around 196,652 (6) inhabitants (Table 1). A total of  
54  
55 229 194,581 people over one-year-old received the first dose, out of whom 99,275 were females and 122,592  
56  
57  
58  
59  
60



1  
2  
3 230 were children aged less than 15 years. For the second round, total 194,325 people were vaccinated,  
4  
5 231 including 99,275 females and 120,169 children less than 15 years old. Notably, the vaccination coverage  
6  
7 232 survey conducted in the target community during each round and post-vaccination exhibited an  
8  
9 233 approximate coverage estimates of 75.9% (95 CI, 73.10 - 78.70%) for the first round and 68.5% (71.80 -  
10  
11 234 65.20%) for the second round. The coverage rate for the full two-doses was estimated at 60.4% (63.80 -  
12  
13 235 57.00%), whereby the coverage of children aged 1-4 years was around 64.4 % (57.10 – 71.10%) (Table  
14  
15 236 1). The coverage rates in each round were higher in male (76.3% and 77.8%) than female (75.4% and  
16  
17 237 67.7%), but coverage rate of full doses was higher in female (64.4%) than male (57.3%). No adverse  
18  
19 238 events were reported during and after the vaccination activities, monitored up to 14 days post-vaccination  
20  
21 239 campaign.  
22  
23  
24 240

241 **Table 1. OCV vaccination coverage estimates, Cuamba District, 2018**

242

243 **a) Administrative vaccination coverage rates**

244

|                                           |                   | Number of people vaccinated (No.) |               |               |               |               |               |               |
|-------------------------------------------|-------------------|-----------------------------------|---------------|---------------|---------------|---------------|---------------|---------------|
|                                           |                   | Day 1                             | Day 2         | Day 3         | Day 4         | Day 5         | Day 6         | Total         |
| <b>1<sup>st</sup> Dose</b>                | <b>Age (year)</b> |                                   |               |               |               |               |               |               |
| Individuals vaccinated per                | 1-4               | 6,493                             | 9,283         | 12,394        | 12,506        | 7,691         | -             | 48,367        |
| age group                                 | 5-15              | 7,050                             | 16,705        | 21,590        | 17,536        | 11,344        | -             | 74,225        |
|                                           | ≥15               | 10,136                            | 12,400        | 18,835        | 18,798        | 11,820        | -             | 71,989        |
| Total no. of daily vaccinated             |                   | 23,679                            | 38,388        | 52,819        | 48,840        | 30,855        | -             | 194,581       |
| Cumulative no. of vaccinated              |                   | 23,679                            | 62,067        | 114,886       | 163,726       | 194,581       | -             |               |
| <b>Cumulative administrative coverage</b> |                   | <b>12.04%</b>                     | <b>31.56%</b> | <b>58.42%</b> | <b>83.26%</b> | <b>98.95%</b> | -             | <b>98.95%</b> |
| <b>2<sup>nd</sup> Dose</b>                |                   |                                   |               |               |               |               |               |               |
| Individuals vaccinated per                | 1-4               | 5,479                             | 6,484         | 11,117        | 9,596         | 7,760         | 7,586         | 48,022        |
| age group                                 | 5-15              | 9,355                             | 8,796         | 15,679        | 13,208        | 14,444        | 10,665        | 72,147        |
|                                           | ≥15               | 9,416                             | 9,275         | 14,271        | 14,265        | 14,848        | 12,081        | 74,156        |
| Total no. of daily vaccinated             |                   | 24,250                            | 24,555        | 41,067        | 37,069        | 37,052        | 30,332        | 194,325       |
| Cumulative no. of vaccinated              |                   | 24,250                            | 48,805        | 89,872        | 126,941       | 163,993       | 194,325       |               |
| <b>Cumulative administrative coverage</b> |                   | <b>12.33%</b>                     | <b>24.82%</b> | <b>45.70%</b> | <b>64.55%</b> | <b>83.39%</b> | <b>98.82%</b> | <b>98.82%</b> |

245

246 **b) Vaccination coverage rates through coverage surveys**

247

|                        |        | First Round      | Second Round     | Full Two Doses   |
|------------------------|--------|------------------|------------------|------------------|
| <b>Age (years old)</b> | 1- 4   | 81.1±4.5%        | 72.2±6.9%        | 64.4±7.3%        |
|                        | 5-14   | 86.4±3.1%        | 71.3±5.8%        | 65.2±6.1%        |
|                        | ≥15    | 67.6±3.3%        | 65.2±4.8%        | 55.7±5.0%        |
| <b>Sex</b>             | Male   | 76.3±2.9%        | 77.8±3.9%        | 57.3±4.6%        |
|                        | Female | 75.4±3.2%        | 67.7±5.0%        | 64.4±5.1%        |
| <b>Total</b>           | -      | <b>75.9±2.2%</b> | <b>68.5±3.3%</b> | <b>60.4±3.4%</b> |

248

### 249 *Source of Information and Acceptability*

250 The source of information on the OCV vaccination campaign, identified by the populations living in the  
 251 vaccination target areas, showed use of megaphone as the most effective tool in disseminating  
 252 information on the vaccination plan and mobilizing the community to get immunized for both rounds:  
 253 24% and 34% at the first and second rounds respectively (Table 2). Around 15% of the surveyed people  
 254 in the target community indicated that they have learnt about the vaccination campaign through radio  
 255 broadcast for the first round, but its communication impact reduced in the second round (4%). This was  
 256 different for the community leaders, whose contribution increased from 5% in the first round to 19% in  
 257 the following round, reflecting their active engagement and communication efforts in close coordination  
 258 with the vaccination teams on the ground.

260 **Table 2. Source of information on OCV campaign, Cuamba District, 2018**

| Source of information | 1 <sup>st</sup> Round <sup>1</sup><br>N= 646<br>n (%=n/N) | 2 <sup>nd</sup> Round <sup>2</sup><br>N= 578<br>n (%=n/N) |
|-----------------------|-----------------------------------------------------------|-----------------------------------------------------------|
| Megaphone             | 152 (24%)                                                 | 195 (34%)                                                 |
| Family                | 60 (9%)                                                   | 53 (9%)                                                   |
| Radio                 | 96 (15%)                                                  | 23 (4%)                                                   |
| Religious leader      | 82 (13%)                                                  | 25 (4%)                                                   |
| Health workers        | 74 (11%)                                                  | 120 (21%)                                                 |
| Activists             | 55 (9%)                                                   | 9 (2%)                                                    |
| Community leader      | 33 (5%)                                                   | 108 (19%)                                                 |
| TV                    | 14 (2%)                                                   | 11 (2%)                                                   |
| Others <sup>3</sup>   | 78 (12%)                                                  | 33 (6%)                                                   |

262 Footnote:

263 <sup>1</sup> 1<sup>st</sup> round: 646 households/or people were interviewed.

264 <sup>2</sup> 2<sup>nd</sup> round: 578 households/or people were interviewed.

265 <sup>3</sup> Others included: list other source of info if such data were collected.

268 ***Reasons for not being vaccinated***

269 The unavailability (absence) of the target population for vaccination and incompatibility between working  
 270 hours and campaign schedule were commonly cited as barriers for vaccination in both the first (35%) and  
 271 the second round (51%) (Table 3). Absence of vaccinators at the vaccination sites were also mentioned,  
 272 12% and 18% for the first and second round respectively, despite the pre-vaccination planning and  
 273 programmatic organization. Notably, around 10% of the target population has indicated that they have not  
 274 been informed about the vaccination campaign even in the second round, though this was a reduction  
 275 compared to 18% in the first round. In order to address the most common barriers identified in the first  
 276 round, the second round of the vaccination campaign was further extended for additional few days  
 277 including the weekends, enabling more people to get vaccinated.

279 **Table 3. Reasons for non-vaccination during the OCV campaign, Cuamba District, 2018**

| Reasons for non-vaccination                             | 1 <sup>st</sup> Dose |     | 2 <sup>nd</sup> Dose |     |
|---------------------------------------------------------|----------------------|-----|----------------------|-----|
|                                                         | n=361                | %   | n=222                | %   |
| Unavailable                                             | 63                   | 17% | 96                   | 43% |
| Incompatibility between working hours and campaign time | 53                   | 15% | 18                   | 8%  |
| Vaccination post without vaccinator                     | 40                   | 11% | 41                   | 18% |
| Did not have information                                | 66                   | 18% | 23                   | 10% |
| Ill during the vaccination period                       | 30                   | 8%  | 10                   | 5%  |
| Does not believe in vaccine efficacy                    | 24                   | 7%  | 2                    | 1%  |
| Afraid of adverse events                                | 8                    | 2%  | 0                    | 0%  |
| Head of the family did not authorize                    | 4                    | 1%  | 2                    | 1%  |
| Religious leader forbid                                 | 2                    | 1%  | 0                    | 0%  |
| Considered not safe for pregnant women                  | 1                    | 0%  | 2                    | 1%  |
| Other                                                   | 70                   | 19% | 28                   | 13% |

1  
2  
3 282 ***OCV delivery costs***  
4

5 283 The total financial cost of campaign was US\$768,904 of which vaccine acquisition including vaccine  
6  
7 284 shipment constituted 69% (US\$533,659) (Table 4). The vaccine delivery costs including, microplanning,  
8  
9 285 training, communication, and social mobilization, vaccination implementation (Round 1 & 2) constituted  
10  
11 286 rest 31% (US\$235,245). The total financial cost per dose delivered was US\$0.60 without the vaccine cost  
12  
13  
14 287 and US\$1.98 including the vaccine costs in 2018 price. The economic cost per dose delivered excluding  
15  
16 288 vaccine costs was five times higher at US\$3.02. The total financial cost of delivery per fully immunized  
17  
18 289 person excluding vaccine costs was US\$1.21.  
19

20 290  
21  
22  
23  
24  
25  
26  
27  
28  
29  
30  
31  
32  
33  
34  
35  
36  
37  
38  
39  
40  
41  
42  
43  
44  
45  
46  
47  
48  
49  
50  
51  
52  
53  
54  
55  
56  
57  
58  
59  
60

291 **Table 4. Costs of OCV vaccine delivery and immunization in Cuamba District**

292

| <b>Vaccine Delivery Costs</b>           | <b>Financial Cost (Mzn)</b> | <b>Economic Cost (Mzn)</b> | <b>Financial Cost (USD)</b> | <b>Economic Cost (USD)</b> |
|-----------------------------------------|-----------------------------|----------------------------|-----------------------------|----------------------------|
| Vaccine Acquisition                     | 32,179,644                  | 42,081,073                 | 533,659                     | 697,862                    |
| Microplanning                           | 640,415                     | 7,596,625                  | 10,620                      | 125,981                    |
| Training                                | 265,186                     | 299,419                    | 4,398                       | 4,965                      |
| Communication and Social Mobilization   | 1,912,520                   | 4,301,342                  | 31,717                      | 71,332                     |
| Vaccination Implementation (Round 1 &2) | 11,367,160                  | 58,510,806                 | 188,510                     | 970,328                    |
| <b>Total</b>                            | <b>46,364,925</b>           | <b>112,789,265</b>         | <b>768,904</b>              | <b>1,870,469</b>           |

  

| <b>Immunization Costs</b>                            | <b>Financial Cost (Mzn)</b> | <b>Economic Cost (Mzn)</b> | <b>Financial Cost (USD)</b> | <b>Economic Cost (USD)</b> |
|------------------------------------------------------|-----------------------------|----------------------------|-----------------------------|----------------------------|
| Cost per Vaccine Administered (including vaccine)    | 119                         | 290                        | 1.98                        | 4.81                       |
| Cost per Vaccine Administered (without vaccine cost) | 36                          | 182                        | 0.60                        | 3.02                       |
| Cost per Partially Immunized Person                  | 238                         | 580                        | 3.95                        | 9.61                       |
| Cost per Fully Immunized Person (with vaccine)       | 239                         | 580                        | 3.96                        | 9.63                       |
| Cost per Fully Immunized Person (without vaccine)    | 73                          | 364                        | 1.21                        | 6.03                       |

293

## 294 Discussion

295 The OCV campaign in Cuamba District was organized without major logistical and programmatic  
296 challenges, and no adverse events were reported throughout the vaccination activities and up to 14 days  
297 after the campaign. Despite the similarity in the number of people vaccinated in the first and second  
298 rounds, the vaccination coverage survey of the second round showed lower coverage estimates than the  
299 first round. This may be due to possible cross border movement of people from untargeted districts to get  
300 vaccination during the second round. The vaccination coverage for the full two-doses was over 60% that  
301 may confer sufficient herd immunity for the following several years based on the existing literature on a  
302 cholera transmission model using the Matlab data from Bangladesh (10,11), which predicted 50%  
303 coverage with OCV in cholera endemic areas may result in 89% reduction in cholera cases in  
304 unvaccinated (12).

305  
306 In our study, children aged 5-14 years exhibited the highest coverage. This may be due to the vaccination  
307 posts in both schools (fixed vaccination post) and near homes (mobile vaccination posts), which  
308 facilitated the school-aged children to access the immunization health service more easily. The female  
309 group also presented higher full vaccination coverage rate compared to the male group, who showed  
310 higher drop-out after first dose, likely associated with their routine boundaries of livelihood near their  
311 houses or their child/children's schools as they take care of children while the male group typically work  
312 outside. This assumption is supported by the fact that the absence during the campaign was identified as a  
313 significant barrier against vaccination during both rounds of the campaign. Similar pattern was  
314 consistently prevalent in the previous OCV campaigns in Beira (13) and Nampula (4), whereby absence  
315 was the main barrier for vaccination. The second round of the campaign coincided with the period of  
316 school holidays when most households move to farming and food production, resulting in higher absence  
317 rate in the second round (43.0%) than in first round (17.0%). Further, it is encouraging to observe more  
318 than 60% vaccination coverage rate among children aged 1-4 years, the most at-risk population age-group  
319 concerning cholera outbreaks. Considering that caregivers for these younger children are mostly women,

1  
2  
3 320 higher vaccination coverage for these toddlers and younger children and women is as anticipated in  
4  
5 321 accordance with other studies published in similar settings (14).  
6

7 322  
8  
9 323 For the monitoring of the campaign, the researchers used representative sampling with the same  
10  
11 324 questionnaire for coverage, which resulted in representative daily coverage. The representative sampling  
12  
13 325 enabled the first-round coverage available before completion of the second round and fed to the  
14  
15 326 coordination team to fine-tune the mop-up campaign. Again, the second and full dose vaccination  
16  
17 327 coverage were estimated within a week after the campaign by extension of the survey days by three more  
18  
19 328 days. However, the survey extension and additional questions for the final coverages (the first, second and  
20  
21 329 full) made some survey team members exhausted, which might have affected survey quality.  
22  
23

24 330  
25  
26 331 In order to enhance the vaccination coverage, it is paramount to better understand the effective means of  
27  
28 332 communications for community sensitization and engagements, as well as barriers towards participating  
29  
30 333 in a vaccination program such as this campaign. Here, we showed that the use of megaphone proved to be  
31  
32 334 the most effective advocacy tool for disseminating information on the vaccination to our target  
33  
34 335 community, which may have allowed the field workers to reach out to families without access to other  
35  
36 336 sources of information. This may also indicate the need to better understand the inter-personnel  
37  
38 337 communication and community mobilization approach for future vaccination campaigns. For those with  
39  
40 338 missed opportunities to receive the OCV doses during the two rounds, a mop-up vaccination can be  
41  
42 339 considered, though it is often more laborious and costly, requiring a complex management (13). Further,  
43  
44 340 informing the public on the availability of a mop-up prior to or during the campaign may negatively affect  
45  
46 341 their participation in the regular vaccination schedule set-up. Hence, a mop-up was not considered after  
47  
48 342 the first round in our approach but pursued after the second round in order to enhance the full two-dose  
49  
50 343 vaccination and verify vaccination data records submitted during the regular program. Approximately  
51  
52 344 15.4% (32,775/212,824) of the delivered second doses were through this mop-up campaign indicative of  
53  
54 345 an effective strategy.  
55  
56  
57  
58  
59  
60



1  
2  
3 346  
4  
5 347 The financial costs of OCV delivery per fully immunized person in this campaign was lower than delivery  
6  
7 348 costs reported in other African countries using the same CholTool (US\$1.8 in Shashemene district of  
8  
9 349 Ethiopia; US\$2.5 in Nsanje district of Malawi; and US\$3.5 in Machinga, Phalombe, and Zomba districts  
10  
11 350 of Malawi per the US\$ price value of 2016), but closer to that reported in Puri district of India (US\$1.14  
12  
13 351 per the US\$ price value of 2016) (9). One reason could be that Mozambique has experience of conducting  
14  
15 352 several OCV campaigns in recent years, and hence there were already resources and expertise available  
16  
17 353 for micro-planning, communication, sensitization, trainings etc., which might have reduced the costs  
18  
19 354 associated with introduction of vaccines in comparison to a vaccination program in naïve setting. The  
20  
21 355 financial cost of US\$0.60 per dose delivered (excluding vaccine procurement) is comparable to the  
22  
23 356 operational support ranging between US\$0.30 and US\$0.80 per person targeted for vaccination  
24  
25 357 campaigns, recommended by the Gavi, the Vaccine Alliance (15,16). This indicates the affordability of  
26  
27 358 OCV campaign in the current setting. To economize the healthcare provider time and efforts and  
28  
29 359 incentivize beneficiaries for greater uptake of vaccines, delivery of multiple products at vaccination posts  
30  
31 360 or on household visits may potentially synergize the delivery cost associated with vaccination campaigns.  
32  
33  
34 361  
35  
36 362 Overall, our study proved the feasibility of conducting a preemptive OCV mass vaccination campaign in a  
37  
38 363 rural and semi-rural setting in Cuamba District and Cuamba Municipality areas respectively, with  
39  
40 364 sufficient coverage rate and relatively lower delivery cost. The success of vaccination was a result of  
41  
42 365 effective coordination and microplanning among stakeholders despite some field challenges. The  
43  
44 366 vaccination strategy utilizing both fixed and mobile posts, as well as the daily feedback to the  
45  
46 367 coordination team on the preliminary coverage survey result and data related to barriers and source of  
47  
48 368 information on the vaccination campaign, proved valuable to prospectively refine the campaign and  
49  
50 369 mobilization strategy every day on a real-time basis.  
51  
52  
53 370  
54  
55  
56  
57  
58  
59  
60

1  
2  
3 371 However, there are several limitations. First, the operational challenges concerning poor road conditions  
4  
5 372 resulted in the accessibility to the target area difficult. Second, the programmatic support that required  
6  
7 373 sufficient and trained human resources and budget for a sustained field monitoring activity and close on-  
8  
9 374 site supervision prior to and during the vaccination campaign and coverage survey activities. Third, the  
10  
11 375 differences in the coverage rates of administrative data and survey result is due to the lack of accurate up-  
12  
13 376 to-date census data of local population. In addition, in order to avoid any conflict with the measles and  
14  
15 377 rubella national immunization campaign that was taking place across the country at the time of this  
16  
17 378 vaccination campaign, we had to delay our OCV vaccination campaign for about two months to obtain  
18  
19 379 support from immunization-related stakeholders, particularly the expanded programme of immunization  
20  
21 380 (EPI) for cold chain space and logistics. Any mass vaccination campaigns should also consider  
22  
23 381 seasonality and other major community activities and/or any political issues.  
24  
25  
26 382

### 28 383 **Acknowledgement**

30 384 The authors acknowledge the local government officials and healthcare professionals in Cuamba District,  
31  
32 385 Niassa Province for engaging the community on the OCV vaccination program throughout the planning  
33  
34 386 and implementation period. Thanks are also extended to the people who consented and took part in the  
35  
36 387 coverage survey. We thank our research partners and staff at the MOCA sentinel site networks in  
37  
38 388 Mozambique, and Ms. Somyoung Cho for the project management and Ms. Jihyun Han and Ms. Nozipho  
39  
40 389 Manjate for the project administrative support.  
41  
42

43 390

### 45 391 **Contributorship**

47 392 S.E.P conceptualized the overall study design of the Mozambique Cholera Prevention and Surveillance  
48  
49 393 (MOCA) project. C.S.B. supervised the MOCA project in Mozambique. N.S.B. supervised the overall  
50  
51 394 vaccination campaign and monitoring and evaluation. All authors participated in the vaccination  
52  
53 395 campaign. J.C., N.L, L.D.B., J.P.L., N.S.B., S.E.P., S.A., A.O., M.M., and the project field team in  
54  
55 396 Cuamba and Niassa contributed to data acquisition on the community vaccination coverage surveys, and  
56  
57  
58

1  
2  
3 397 interpretation of results under the supervision of N.S.B. R.B.J.M., J.A.M., S.A., A.O., M.M., and others in  
4  
5 398 the vaccination teams of Cuamba District and Niassa Province contributed to acquisition, review, and  
6  
7 399 report of the administrative coverage data. I.C. contributed to data acquisition and analysis on vaccination  
8  
9 400 costs; and V.M. and C.V.R. reviewed the cost analysis. J.C. drafted and edited the paper under the  
10  
11 401 scientific guidance from N.S.B. and S.E.P. All authors read and approved the final draft.  
12  
13

14 402

### 15 403 **Funding Statement**

16  
17  
18 404 This study was supported by the Korea International Cooperation Agency (KOICA), government of the  
19  
20 405 Republic of Korea. The findings and conclusions are our own and do not necessarily reflect positions of  
21  
22 406 the KOICA. The International Vaccine Institute acknowledges its donors, including the Government of  
23  
24 407 Republic of Korea and the Swedish International Development Cooperation Agency (SIDA).  
25

26 408

### 27 28 409 **Competing of Interests**

29  
30 410 The authors declare no competing interests.  
31  
32

33 411

### 34 412 **Ethics approval**

35  
36  
37 413 Institutional Ethical Committee of the National Institute of Health (Ref: 116/CNBS/19) and ethical review  
38  
39 414 board of the International Vaccine Institute, Seoul, Korea (IRB number 2017-006) approved the study  
40  
41 415 protocol for the OCV mass vaccination campaign monitoring and coverage survey.  
42

43 416

### 44 417 **Data sharing**

45  
46  
47 418 All data relevant to the study are included in the article.  
48  
49

50 419

### 51 420 **Figure legends**

52 421

### 53 54 55 422 **Figure 1. Pre-emptive OCV mass vaccination site**

1  
2  
3 423  
4  
5 424 Location of the pre-emptive OCV vaccination campaign site in Cuamba District, Mozambique, included  
6  
7 425 bairros and povoados in the municipality and district.  
8  
9 426

10  
11 427 **References**

- 12  
13  
14 428 1. Chun-Hai Fung I, Fitter DL, Borse RH, Meltzer MI, Tappero JW. **Modeling the Effect of Water,**  
15  
16 429 **Sanitation, and Hygiene and Oral Cholera Vaccine Implementation in Haiti.** *Am J Trop Med*  
17  
18 430 *Hyg.* 2013 Oct 9;89(4):633–40.  
19  
20 431 2. Langa JP, Sema C, De Deus N, Colombo MM, Taviani E. **Epidemic waves of cholera in the last**  
21  
22 432 **two decades in Mozambique.** *J Infect Dev Ctries* [Internet]. 2015 Jul 4 [cited 2015 Oct 5];9(06).  
23  
24 433 Available from: <http://www.jidc.org/index.php/journal/article/view/6943>  
25  
26 434 3. WHO. 2013. **Cholera country profile: Mozambique.** Global Task Force on Cholera Control.  
27  
28 435 4. Semá Baltazar C, Rafael F, Langa JPM, Chicumbe S, Cavailler P, Gessner BD, *et al.* **Oral cholera**  
29  
30 436 **vaccine coverage during a preventive door-to-door mass vaccination campaign in Nampula,**  
31  
32 437 **Mozambique.** *PloS One.* 2018;13(10): e0198592.  
33  
34  
35 438 5. WHO. **Cholera vaccines: WHO position paper –August 2017.** *Wkly Epidemiol Rec.*  
36  
37 439 2017;92(34):477–498  
38  
39 440 6. Instituto Nacional de Estatística (INE). 2017. **IV Recenseamento Geral da População e Habitação.**  
40  
41 441 **Divulgação os resultados preliminares IV RGPH 2017: Habitação, agregados familiares e**  
42  
43 442 **população, Província de Niassa, p. 3.**  
44  
45 443 7. Gujral L, Sema C, Rebaudet S, Taibo CLA, Manjate AA, Piarroux R, *et al.* **Cholera epidemiology**  
46  
47 444 **in Mozambique using national surveillance data.** *J Infect Dis.* 2013 Nov 1;208 Suppl 1:S107-114.  
48  
49 445 8. Instituto Nacional de Estatística (INE). 2007. **Recenseamento Geral da População e Habitação**  
50  
51 446 **2007: Indicadores Sócio Demográficos, Província de Niassa, p. 63.**  
52  
53  
54  
55  
56  
57  
58  
59  
60

- 1  
2  
3 447 9. Morgan, W. *et al.* (2020). **Costing oral cholera vaccine delivery using a generic oral cholera**  
4 **vaccine delivery planning and costing tool (CholTool)**. *Human Vaccines and Immunotherapeutics*.  
5 448 Taylor & Francis, 16(12), pp. 3111–3118. doi: 10.1080/21645515.2020.1747930.  
6  
7 449  
8  
9 450 10. Clemens JD, Sack DA, Harris JR, Chakraborty J, Khan MR, *et al.* (1986). **Field trial of oral**  
10 **cholera vaccines in Bangladesh**. *Lancet* 2: 124–127.  
11 451  
12  
13 452 11. Clemens JD, Sack DA, Harris JR, Van Loon F, Chakraborty J, *et al.* (1990) **Field trial of oral**  
14 **cholera vaccines in Bangladesh: Results from three-year follow-up**. *Lancet* 335: 270–273.  
15 453  
16  
17 454 12. Longini IM, Nizam A, Ali M, Yunus M, Shenvi N. (2007). **Controlling endemic cholera with**  
18 **oral vaccines**. *PLoS Med* 4: e336. doi:10.1371/journal.pmed.0040336.  
19 455  
20  
21 456 13. Lucas ME, Deen JL, von Seidlein L, Wang X-Y, Ampuero J, Puri M, *et al.* **Effectiveness of mass**  
22 **oral cholera vaccination in Beira, Mozambique**. *N Engl J Med*. 2005;352(8):757–767.  
23 457  
24  
25 458 14. D. Legros, C. Paquet, W. Perea, I. Marty, N. Kenya Mugisha, H. Royer, M. Neira, & B. Ivanoff.  
26 459 **1999. Mass vaccination with a two-dose oral cholera vaccine in a refugee camp in Sudan,**  
27 **Uganda**. *Bulletin of the World Health Organization*, 77(10).  
28 460  
29  
30 461 15. Gavi, the Vaccine Alliance. Vaccine introduction grants and operational support  
31 for campaigns. Report to the GAVI Alliance Board. 12-13 June 2012. Available at:  
32 462 [https://www.gavi.org/sites/default/files/board/minutes/2012/12-june/13%20-](https://www.gavi.org/sites/default/files/board/minutes/2012/12-june/13%20-%20Vaccine%20introduction%20grants%20and%20operation%20support%20for%20campaigns%20document.pdf)  
33 463 [%20Vaccine%20introduction%20grants%20and%20operation%20support%20for%20campaigns%](https://www.gavi.org/sites/default/files/board/minutes/2012/12-june/13%20-%20Vaccine%20introduction%20grants%20and%20operation%20support%20for%20campaigns%20document.pdf)  
34 464 [20document.pdf](https://www.gavi.org/sites/default/files/board/minutes/2012/12-june/13%20-%20Vaccine%20introduction%20grants%20and%20operation%20support%20for%20campaigns%20document.pdf) (Accessed on 9 February, 2021).  
35 465  
36  
37 466 16. Gavi, the Vaccine Alliance. GAVI Alliance Board Meeting. 12-13 June 2012, Washington, DC,  
38 467 USA, Final Minutes. Available at:  
39 468 [https://www.gavi.org/sites/default/files/board/minutes/2012/Board-2012-Mtg-02%20-](https://www.gavi.org/sites/default/files/board/minutes/2012/Board-2012-Mtg-02%20-%20Minutes.pdf)  
40 469 [%20Minutes.pdf](https://www.gavi.org/sites/default/files/board/minutes/2012/Board-2012-Mtg-02%20-%20Minutes.pdf) (Accessed on 9 February, 2021).  
41 470  
42  
43  
44  
45  
46  
47  
48  
49  
50  
51  
52  
53  
54  
55  
56  
57  
58  
59  
60

1  
2  
3  
4  
5  
6  
7  
8  
9  
10  
11  
12  
13  
14  
15  
16  
17  
18  
19  
20  
21  
22  
23  
24  
25  
26  
27  
28  
29  
30  
31  
32  
33  
34  
35  
36  
37  
38  
39  
40  
41  
42  
43  
44  
45  
46  
47  
48  
49  
50  
51  
52  
53  
54  
55  
56  
57  
58  
59  
60

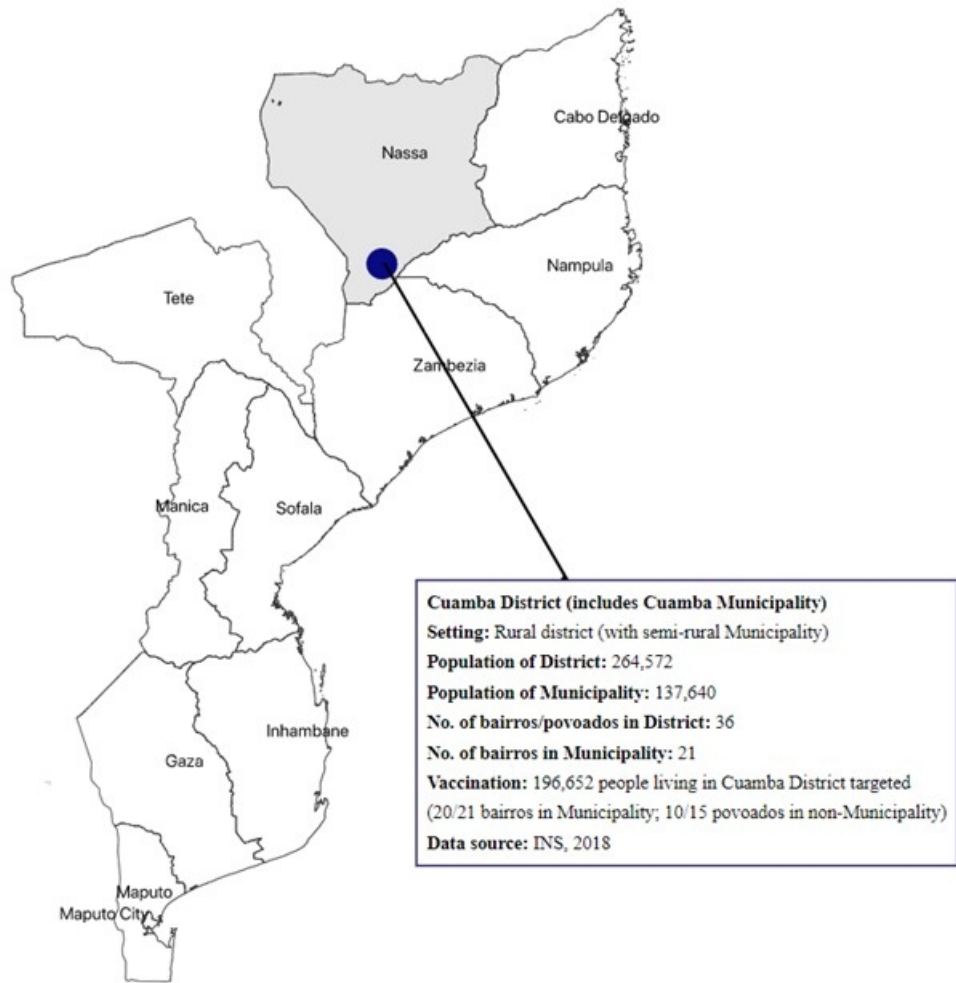

Figure 1. Pre-emptive OCV mass vaccination site

Figure 1. Pre-emptive OCV mass vaccination site

Location of the pre-emptive OCV vaccination campaign site in Cuamba District, Mozambique, included bairros and povoados in the municipality and district.

165x181mm (96 x 96 DPI)

1  
2  
3  
4 **The Final Vaccine Coverage Estimation by Five Series of Quick Household**  
5 **Surveys for Monitoring of the Preventive Vaccination Campaign in Cuamba**  
6  
7  
8  
9  
10  
11  
12  
13  
14  
15  
16  
17  
18  
19  
20  
21  
22  
23  
24  
25  
26  
27  
28  
29  
30  
31  
32  
33  
34  
35  
36  
37  
38  
39  
40  
41  
42  
43  
44  
45  
46  
47  
48  
49  
50  
51  
52  
53  
54  
55  
56  
57  
58  
59  
60

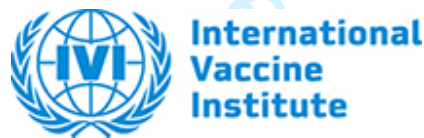

Seoul, Korea  
June 11, 2018

For peer review only

1  
2  
3  
4  
5  
6  
7  
8  
9  
10  
11  
12  
13  
14  
15  
16  
17  
18  
19  
20  
21  
22  
23  
24  
25  
26  
27  
28  
29  
30  
31  
32  
33  
34  
35  
36  
37  
38  
39  
40  
41  
42  
43  
44  
45  
46  
47  
48  
49  
50  
51  
52  
53  
54  
55  
56  
57  
58  
59  
60

**Table of Contents**

|    |                                           |     |
|----|-------------------------------------------|-----|
| 1  | Working Group (in alphabetic order) ..... | 3   |
| 2  | Introduction .....                        | 5   |
| 3  | Objectives .....                          | 6   |
| 4  | Design .....                              | 7   |
| 5  | Sample Size Estimation .....              | 7   |
| 6  | Consent Process .....                     | 7   |
| 7  | Study Implementation .....                | 8   |
| 8  | Ethical considerations .....              | 10  |
| 9  | Data management Plan .....                | 100 |
| 10 | Potential Risk and Mitigation Plan .....  | 10  |
| 11 | Benefits of the study .....               | 111 |
| 12 | Fund .....                                | 111 |
| 13 | References .....                          | 122 |

For peer review only



1  
2  
3  
4  
5 **1 Working Group (in alphabetic order)**  
6

7 Carlos Francisco Sande, MOH Mozambique

8 Cynthia Sema, INS Mozambique

9 Florian Mark, Head of Epidemiology, International Vaccine Institute

10 Jose Paulo M Langa, INS Mozambique

11 Ju Yeon Park, Associate Researcher, International Vaccine Institute

12 Julia Lynch, Deputy Director General, International Vaccine Institute

13 Liliana D Baloi, INS Mozambique

14 Namseon Beck, Program Director, Delivery, International Vaccine Institute

15 Se Eun Park, Associate Research Scientist, International Vaccine Institute

16 Vittal Mogasale, Head of Policy and Economic Research Department

17 Yun Chon, Head of Biostatistics & Data Management  
18  
19  
20  
21  
22  
23  
24  
25  
26  
27  
28  
29  
30  
31  
32  
33  
34  
35  
36  
37  
38  
39  
40  
41  
42  
43  
44  
45  
46  
47  
48  
49  
50  
51  
52  
53  
54  
55  
56  
57  
58  
59  
60

For peer review only

**Abbreviations**

|      |                                                                        |
|------|------------------------------------------------------------------------|
| AE   | Adverse Event                                                          |
| AEFI | Adverse Event Following Immunization                                   |
| CFR  | Case Fatality Rate                                                     |
| DRC  | Democratic Republic of Congo                                           |
| INS  | Instituto Nacional de Saúde                                            |
| IVI  | the International Vaccine Institute                                    |
| M&E  | Monitoring and Evaluation                                              |
| MOH  | Ministry of Health                                                     |
| OCHA | the United Nations Office for the Coordination of Humanitarian Affairs |
| OCV  | Oral Cholera Vaccine                                                   |
| PAHO | Pan American Health Organization                                       |
| PPS  | Probability Proportional to Population Size                            |
| PSU  | Primary Sampling Unit                                                  |
| SAE  | Serious Adverse Event (SAE).                                           |
| SSU  | Secondary Sampling Unit                                                |

## 2 Introduction

Mozambique suffers from regular floods along its principal rivers, especially the Zambezi and Limpopo river basins, and also cyclones almost annually. An outbreak of cholera was first reported in Mozambique in the early 1970s, followed by several epidemics in 1997-1999 and 2012-2014. [1] In December 2014, another cholera outbreak was reported in the country, with an official outbreak declaration by the government in January 2015. The situation worsened with extensive flooding, which led to over 8,835 cholera cases including 65 deaths in five months. [2] International humanitarian organizations and UN agencies responded with emergency cholera treatments and care service in the affected areas, but the need to address the gap in preparedness and response activities were identified by the United Nations Office for the Coordination of Humanitarian Affairs (OCHA).

In October 2016, a large scale OCV campaign was conducted in Nampula and neighborhoods regularly affected by cholera outbreaks. .

In 2017, the rainy season has been characterized by less frequent but heavier rains including the recent tropical cyclone, Dineo. Response to the cyclone together with other emergencies as well as a financial crisis has led to a dearth of human resources for response. Risk factors fueling cholera transmission include shortage of potable water, contamination of house water in cyclone-affected areas, and recurrent risk of flooding in high density populated areas, particularly in the most deprived areas. Between week 1 and 11, a total of 1,622 suspect cases and 3 deaths (CFR 0.2%) have been reported. Seventy five percent of cases came from Nampula and Tete provinces with 653 cases (40%) from Tete city during weeks 10 and 11 [3].

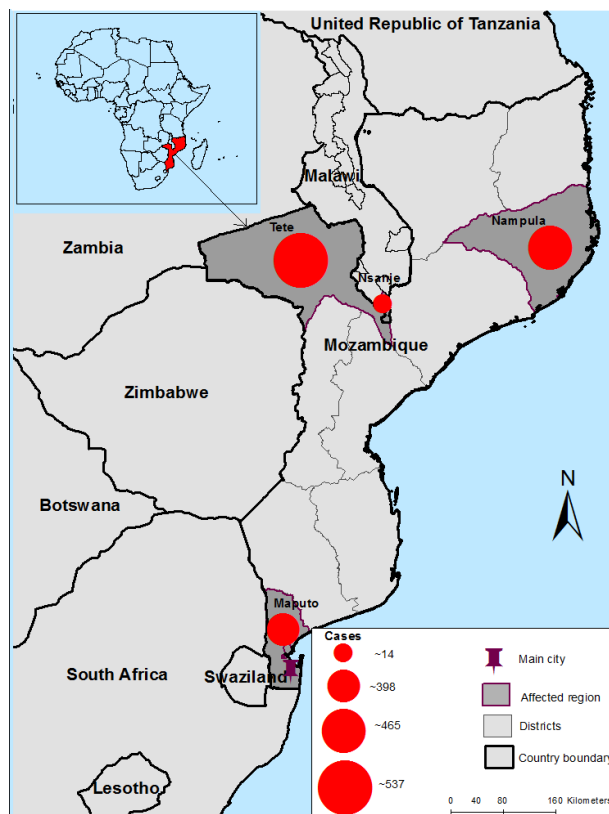

Figure 1. Geographical distribution of Cholera cases in Mozambique, 01 January - 15 March 2017 [4]

Coping with the outbreaks, the first round of reactive OCV campaign has been successfully conducted in Tete in June, 2017, which will be followed by the second dose immunization scheduled in Decembre.

Cuamba, an adjacent district to Nampula with an estimated population of over 300,000 inhabitants is considered as a cholera hot spot. As the district regularly experiences more than 200 suspect cholera cases per year except 2014 and 2016 the district will be targeted by IVI for a mass cholera vaccination campaign with supported by KOICA, followed by a cholera and diarrheal surveillance. With 180,000 individuals over the age of one year in the at-risk communities in the target area will benefit from receiving OCV (Euvichol<sup>®</sup>) hopefully before the rainy season.

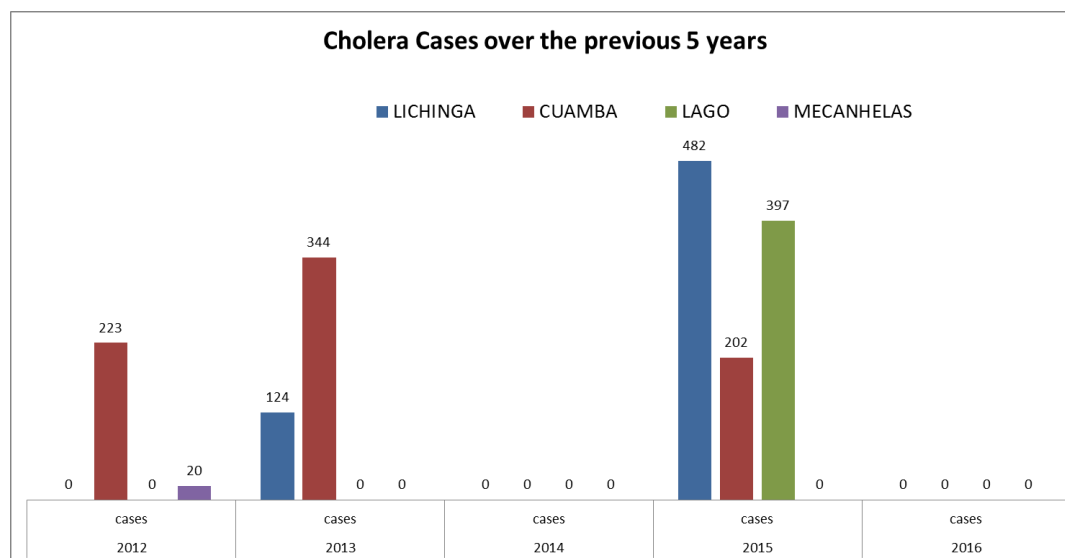

The Rapid Coverage Monitoring strategy was designed by PAHO to provide local authorities with a quick impression of the completeness of vaccination [5,6]. Modifying the monitoring tool, Save the Children has invented a new monitoring tool which enables to estimate not only daily vaccination coverage and vaccination barriers, but also the final coverage. And its usefulness was proved during the period of preemptive 2016 yellow fever vaccination campaign in DRC [7].

### 3 Objectives

#### 3.1 General Objective

- 1) To provide support to MOH Mozambique to ensure successful and quality national OCV campaign

#### 3.2 Specific Objectives

- Evaluate the OCV vaccination campaign by estimation of final-day and post vaccination coverage
- Validate quick monitoring survey for estimation of final coverage
- Provide technical support to MOH Mozambique to ensure successful OCV campaign and quality data collection
- Build M&E capacity of MOH Mozambique ensuring quality vaccination campaign

- Increase vaccine coverage by feeding the vaccination team with daily vaccine coverage and barriers against cholera vaccination

## 4 Design

### 4.1 M&E activities during the Vaccination Campaign

During the vaccination campaigns, daily vaccine coverage and barriers against vaccination will be closely monitored employing a close monitoring tool described in the implementation section. The monitoring results will be fed to the vaccination team to address any identified challenges on real time bases. The final vaccine coverage will be estimated at the last day of the campaign for the three age groups including 'aged between 1 and 4 years', '5 to 14 years' and 'more than 15 years' using 'measurement error approach' [Annex 2] by analyzing the monitoring and administrative data. Mop-up vaccination shall be considered in case where the coverage rate indicates too low.

## 5 Sample Size Estimation

### 5.1 M&E activities for the vaccination campaign

In order to get the final vaccine coverage rate with reasonable precision (5%), we will conduct five series of independent assessment in the Cuamba district during the mass vaccination campaign day 1 to 5. Based on a confidence level of 95%, assuming 80% coverage and accounting for a design effect of 2, sample size requirements have been determined as follows in the table 1 for each of the three age groups: 1-4, 5-14 and 15+ years of age.

$$\text{Sample size} = \frac{t^2 P(1-P)d_{eff}}{d^2}$$

, where denotes  $t = t$  score,  $p =$  prevalence (or coverage),  $d =$  precision, and  $d_{eff} =$  design effect

Table 1. the number of households reached for each age group \*

| Age group        | average household size | precision | Estimated coverage | Required sample size | Proportion among total population* | Average # of people / HH | required household | Household to be reached |
|------------------|------------------------|-----------|--------------------|----------------------|------------------------------------|--------------------------|--------------------|-------------------------|
| 1-4 years        | 6                      | 0.05      | 0.8                | 535                  | 14.0%                              | 0.8                      | 637                | 650                     |
| 5-14 years       | 6                      | 0.05      | 0.8                | 535                  | 26.9%                              | 1.6                      | 332                | 650                     |
| 15 years or more | 6                      | 0.05      | 0.8                | 535                  | 55.9%                              | 3.4                      | 160                | 650                     |

In conclusion, total 650 households will be reached to get 550 children aged between 1-4 years. However for the age group for 5-14 years and 15+, who are available more than 1 for average household, the enumerators will identify only one for the specific age group from each household for survey by randomization. Upon failure of acquisition of survey consent, the enumerators are advised to skip the household but continue to the nearest next household until reach all 26 households per cluster.

## 6 Consent Process

\* UNICEF country profile 2016

1  
2  
3 Data for the coverage survey will be obtained from an adult in the household, where adult is  
4 defined as the person aged +18 years or the parents (aged 15 years or more) of a child(ren). As the  
5 study is low risk, there will be no need for witness unless otherwise required by Institutional Review  
6 Board (IRB). Consent for the vaccination survey will take place at the home of individuals living in  
7 the target areas of the vaccination campaign before each survey. Residing in a target area for  
8 vaccination will make an individual eligible for each survey. The age at the vaccination campaign is  
9 considered for the eligibility for the survey by each age group. The consent and survey answers will  
10 be obtained from the household heads or the adult who is most knowledgeable about the  
11 household members' health whenever possible.  
12

## 13 **7 Study Implementation**

### 14 **M&E activities for the vaccination campaign**

#### 15 **7.1.1 Daily monitoring of vaccine coverage and barriers**

16  
17 During the vaccination campaign, daily vaccine coverage, acceptability and barriers against the  
18 campaign will be closely monitored employing a close monitoring tool described below. The  
19 monitoring results will be fed to vaccination team to address any identified challenges on real time  
20 bases. The final vaccine coverage will be estimated at the last day of the campaign using  
21 'measurement error approach' (Annex 2) by analyzing the monitoring and administrative data.  
22 Mop-up vaccination shall be considered in case where the coverage rate indicates too low.  
23  
24

##### 25 **7.1.1.1 Daily Vaccine Coverage with precision of ~10%, and Barriers against vaccination:**

26  
27 From Day 1 through Day 5, five community assessment teams are sent to the 5 clusters for each  
28 vaccination group, where each team randomly identify 26 households and collect data for 'daily  
29 vaccine coverage' and 'barriers' reaching daily total 130 households from 5 clusters households  
30 involving more than 110 individuals for each of two age groups: 1-4, 5-14 and 15+ years. Based on  
31 the collected data, the survey supervisor will estimate daily vaccine coverage rate and barriers from  
32 D1 through 5 and share the results with the vaccination team and stakeholders to improve vaccine  
33 coverage.  
34  
35

#### 36 **Data Collection:**

37  
38 Data for the community survey will be collected by trained surveyors and supervisors by direct  
39 interview with a questionnaire (Annex 1). A pilot will be conducted to test the questionnaire before  
40 the survey. Each questionnaire will collect information on a cluster of around 130 individuals for  
41 each age group. The aim of the questionnaire is to obtain information on the vaccination status of  
42 individuals, on the reasons for non-vaccination and on demographic characteristics that can be  
43 associated with vaccination.  
44  
45

#### 46 **Sampling Method for quick monitoring assessment:**

47  
48 The sampling method will be two stage cluster sampling to select localities (primary sampling units  
49 or PSUs) and households (secondary sampling units or SSUs). In each district 25 localities (villages or  
50 neighborhoods) will be selected, in which clusters of 26 households will be accessed. PSUs will be  
51 selected from the list of the villages in the districts (with information on the size of the target  
52 population) according to probability proportional to population size (PPS). Each day for the  
53 monitoring survey, 5 clusters are selected randomly out of the total 25 clusters identified by PPS so  
54  
55  
56  
57  
58  
59  
60

1  
2  
3 as not to reach the same cluster/household during the vaccination campaign. In this way the  
4 number of clusters assigned to each locality will be based on the demographic weight of the village.  
5 The first household (SSU) in each cluster will be selected according to geographic random sampling:  
6 we will draft a map of the locality, divide it into smaller sectors according to existing divisions  
7 (streets, rivers, etc), and select one sector according to simple random sampling (SRS). We will  
8 continue dividing the selected sector until obtaining a sector with less than 20 households. In the  
9 finally selected sector, we will number each household and selected one randomly to start the  
10 survey. Once the interview will be completed in the household, we will move to the nearest the  
11 household to select the subsequent households. Out of the eligible persons in the household  
12 surveyed the enumerators are trained to select only one for each age group from each household  
13 by randomization, and an adult will be identified for assess the barriers.  
14

15  
16 If the survey subjects (children aged 1-4 years, 5-14 years or 15 or more) are not available, the  
17 enumerators are advised to move to the next households until reach 26 households.  
18

19 The questionnaire is composed by three sections (Annex 1, survey questionnaire):

- 20 • Questions about vaccination status
    - 21 - How many eligible individuals (aged over one year) live in the household
    - 22 - Vaccinated: Yes/No for each eligible individuals
    - 23 - Vaccination card is available: Yes/No
    - 24 - Length of journey to the nearest health center:
  - 25 • Questions about reasons for non-vaccination: pre-coded multiple choice
  - 26 • Questions about the awareness of the campaign
- 27  
28  
29

30 Reason for non-vaccination:

31 Using the questionnaire the investigator will identify the major barriers against the mass  
32 vaccination campaign and its delivery and administration strategies, and feed the result to the  
33 vaccination coordination team.  
34

35 7.1.1.2 Final Vaccine Coverage using monitoring and administrative data:

36  
37 With the data of the daily vaccine coverage rate and cumulative vaccine consumption for each day,  
38 the final vaccination coverage is estimated using 'measurement error approach' as described in  
39 Annex 2 on assumption that the vaccine coverage rate is linearly correlated with the cumulative  
40 number of vaccine consumption.  
41

42 7.1.2 Post vaccination coverage survey

43  
44 The post vaccination survey will employ the same sampling method and questionnaire used for the  
45 daily monitoring while the post-vaccination survey will be conducted after the vaccination.  
46  
47

48 After the vaccination campaign has been completed, interview teams will be mobilized to visit  
49 homes in the target areas. Two interviewers make up a team and administer the surveys with the  
50 same questionnaire as used for daily monitoring survey. If the family is not home at the time when  
51 the interview team approaches a selected house, the team would attempt to re-visit that house  
52 later in the day.  
53  
54

55 A two-stage cluster sampling methods will be used to reach 650 households in which the clusters  
56 are selected first using PPS, and in a second stage, households are selected from within those  
57 clusters, which is used for the daily monitoring. Based on the collected data, the coverage rate is  
58 estimated by disaggregation by age: 1-4 years, 5 years or more.  
59  
60

### 7.1.3 Monitoring of AEFI (Adverse Events Following Immunization)

Passive AEFI surveillance system will be set up for monitoring of adverse events following immunization at the health facilities up to 14 days after the vaccination campaign. However at the same time for the women with overt pregnant sign in their 2<sup>nd</sup> and 3<sup>rd</sup> trimester, and those reporting pregnancy during the vaccination period, the contact details (phone number) will be collected to reach them for active monitoring of adverse events both for the women and possible pregnancy outcomes up to 14 days after the campaign.

## 8 Ethical considerations

For household survey, data will be treated confidentially and no personal identifiers (names) will be collected from the interviewees. Verbal informed consent will be asked from the responsible adults in the household before starting the survey. Considering that the household survey described in this proposal is a programmatic activity undertaken in the frame of the already advised guideline by international community as a package of mass vaccination program, only verbal consent will be obtained for the data collection from the households surveyed.

If only children are available in the household selected, the questionnaires will not be administered and the household will be revisited or excluded.

For monitoring of AEFI, a verbal consent will be obtained from the pregnant women before acquisition of the contact details (Inform Consent Form) as well. While obtaining verbal consent the team will explain the purpose of the survey and AEFI surveillance to the parents or guardians of potential participants, and pregnant women and answer any questions that may arise. Considering illiteracy, the team uses a witness for the information by word of mouth. The adults or guardians of potential participants, or pregnant women will be provided the opportunity to ask questions prior to offer verbal consent. Before providing the verbal consent, parents or guardians of potential participants, or pregnant women will be asked to undergo an informed consent process validation to ensure that they fully understand the purpose of the study, procedures, AEFI surveillance and their rights. They are also informed to withdraw consent at any time.

## 9 Data management Plan

All source of documents and electronic records of participants in this study will be paper-based and double-entered into the study database by dedicated data entry staff. All data will be secured in locked cabinets at the INS office. The electronic database will be password protected and study computers will be locked. The database will automatically be backed up onto local hard disks and external drives. Access to the electronic database and hard-copy data will be restricted to authorized senior study personnel only. Data entry and cleaning will be conducted at local sites.

If resources allow, a digital platform for collection of study information on portable tablets may be developed and utilized in this study. Data will be uploaded from all devices at the end of each day to the central database and backed-up to compensate instability of electricity supply together with keeping paper based data until completion of all data installation. Paper-based data collection will be continued until the quality of digital collection is well established.

## 10 Potential Risk and Mitigation Plan

While there are no direct individual risks from participation in the study, information will be collected that could be used to identify the patient. Although the study takes care to keep this



1  
2 information confidential, there is a risk that information could be stolen or accidentally released. All  
3 data related to the study will be kept on password-locked computers and only specified study staff  
4 will have access to the database where the information is stored.  
5  
6

7 The vaccination campaign might be delayed owing to slowness in acquisition of import permit,  
8 registration, procurement, transportation of the vaccine as well as seasonal challenges. To mitigate  
9 the expected challenges, the project team will work closely with the government officials with MOH  
10 and WHO country and HQ IHM teams as well as Joint Cholera Initiative for Southern Africa for  
11 expediting the vaccine registration and permission of utilization process. Also before  
12 commencement of the project, IVI will work closely with the manufacture of the vaccine and  
13 monitor the vaccine production and shipment.  
14

## 15 **11 Benefits of the study**

16  
17 Participation in the study will benefit the study population by being vaccinated against the V.  
18 cholerae which effects will last at least three years with reasonable efficacy. However the results of  
19 this study will benefit all populations at risk of cholera infection by improving the scientific  
20 understanding of the protection offered by vaccination and directing both preventative and  
21 reactive vaccine strategies. The pregnant women who provides contact details will be reached for  
22 monitoring of adverse events and guided for appropriate care at nearest health facility for any  
23 potential adverse events.  
24  
25

## 26 **12 Fund**

27 This M&E is a part of the MOCA project.  
28  
29  
30  
31  
32  
33  
34  
35  
36  
37  
38  
39  
40  
41  
42  
43  
44  
45  
46  
47  
48  
49  
50  
51  
52  
53  
54  
55  
56  
57  
58  
59  
60

### 13 References

---

1. Langa et al, Epidemic Waves of Cholera in the Last Two Decades in Mozambique. 2015. *J Inf Dev Countries*;9:635-641.
2. IFRC, Emergency Appeal Operation Update. Mozambique: Flood, 20 February 2015 available at <https://reliefweb.int/sites/reliefweb.int/files/resources/MDRMZ01102%5B1%5D.pdf>
3. Joint Cholera Initiative for Southern Africa (JCISA) Sub-regional up-date on Cholera; 2017 –Week 12 available at [https://reliefweb.int/sites/reliefweb.int/files/resources/jcisa\\_bulletin\\_12\\_week\\_12march2017.pdf](https://reliefweb.int/sites/reliefweb.int/files/resources/jcisa_bulletin_12_week_12march2017.pdf)
4. WHO, WEEKLY UPDATE ON OUTBREAKS AND OTHER EMERGENCIESREGIONAL Week 13:25-31 March
5. H Izurieta, L Venczel, V Dietz, G Tambini, O Barrezueta, P Carrasco, et al., et al. Monitoring measles eradication in the region of the Americas: critical activities and tools. *J Infect Dis* 2003; 187: S133-9.
6. WHO, Evaluation guidelines for Measles supplemental immunization activities. 2006 available at: <http://measlesrubellainitiative.org/wp-content/uploads/2017/01/Evaluation-guidelines.pdf>
7. Unpublished data, Save the Children, EUH. The Final Vaccine Coverage Rate Estimation by Four Series of Quick Household Surveys for Monitoring During the Yellow Fever Preventive Vaccination Campaign in DRC

# BMJ Open

## A pre-emptive Oral Cholera Vaccine (OCV) mass vaccination campaign in Cuamba District, Niassa Province, Mozambique: feasibility, vaccination coverage, and delivery costs using CholTool

|                                 |                                                                                                                                                                                                                                                                                                                                                                                                                                                                                                                                                                                                                                                                                                                                                                                                                                                                                                                                                                                                                                                                                                                             |
|---------------------------------|-----------------------------------------------------------------------------------------------------------------------------------------------------------------------------------------------------------------------------------------------------------------------------------------------------------------------------------------------------------------------------------------------------------------------------------------------------------------------------------------------------------------------------------------------------------------------------------------------------------------------------------------------------------------------------------------------------------------------------------------------------------------------------------------------------------------------------------------------------------------------------------------------------------------------------------------------------------------------------------------------------------------------------------------------------------------------------------------------------------------------------|
| Journal:                        | <i>BMJ Open</i>                                                                                                                                                                                                                                                                                                                                                                                                                                                                                                                                                                                                                                                                                                                                                                                                                                                                                                                                                                                                                                                                                                             |
| Manuscript ID                   | bmjopen-2021-053585.R3                                                                                                                                                                                                                                                                                                                                                                                                                                                                                                                                                                                                                                                                                                                                                                                                                                                                                                                                                                                                                                                                                                      |
| Article Type:                   | Original research                                                                                                                                                                                                                                                                                                                                                                                                                                                                                                                                                                                                                                                                                                                                                                                                                                                                                                                                                                                                                                                                                                           |
| Date Submitted by the Author:   | 27-Apr-2022                                                                                                                                                                                                                                                                                                                                                                                                                                                                                                                                                                                                                                                                                                                                                                                                                                                                                                                                                                                                                                                                                                                 |
| Complete List of Authors:       | Elias Chitio, Jucunú J.; National Institute of Health<br>Baltazar, Cynthia; National Institute of Health<br>Langa, José Paulo; National Institute of Health<br>Baloi, Liliana Dengo; National Institute of Health<br>Mboane, Ramos B. J.; Provincial Directorate of Health, Provincial Directorate of Health<br>Manuel, José Alberto; Provincial Directorate of Health, Provincial Directorate of Health<br>Assane, Sadate; Provincial Directorate of Health, Provincial Directorate of Health<br>Omar, Alide; District Health Directorate, District Health Directorate<br>Manso, Mariana; District Health Directorate, District Health Directorate<br>Capitine, Igor; National Institute of Health<br>Van Rensburg, Craig; International Vaccine Institute<br>Luiz, Naira; National Institute of Health; International Vaccine Institute<br>Mogasale, Vittal; International Vaccine Institute, Policy and Economic Research<br>Marks, Florian ; International Vaccine Institute<br>Park, Se Eun; International Vaccine Institute; Yonsei University<br>Beck, Namseon; International Vaccine Institute; Medair Headquarters |
| <b>Primary Subject Heading</b>: | Global health                                                                                                                                                                                                                                                                                                                                                                                                                                                                                                                                                                                                                                                                                                                                                                                                                                                                                                                                                                                                                                                                                                               |
| Secondary Subject Heading:      | Infectious diseases, Health economics, Global health, Health policy                                                                                                                                                                                                                                                                                                                                                                                                                                                                                                                                                                                                                                                                                                                                                                                                                                                                                                                                                                                                                                                         |
| Keywords:                       | PUBLIC HEALTH, HEALTH ECONOMICS, INFECTIOUS DISEASES, PREVENTIVE MEDICINE, Infection control < INFECTIOUS DISEASES                                                                                                                                                                                                                                                                                                                                                                                                                                                                                                                                                                                                                                                                                                                                                                                                                                                                                                                                                                                                          |
|                                 |                                                                                                                                                                                                                                                                                                                                                                                                                                                                                                                                                                                                                                                                                                                                                                                                                                                                                                                                                                                                                                                                                                                             |

SCHOLARONE™  
Manuscripts

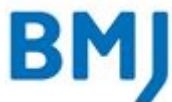

I, the Submitting Author has the right to grant and does grant on behalf of all authors of the Work (as defined in the below author licence), an exclusive licence and/or a non-exclusive licence for contributions from authors who are: i) UK Crown employees; ii) where BMJ has agreed a CC-BY licence shall apply, and/or iii) in accordance with the terms applicable for US Federal Government officers or employees acting as part of their official duties; on a worldwide, perpetual, irrevocable, royalty-free basis to BMJ Publishing Group Ltd ("BMJ") its licensees and where the relevant Journal is co-owned by BMJ to the co-owners of the Journal, to publish the Work in this journal and any other BMJ products and to exploit all rights, as set out in our [licence](#).

The Submitting Author accepts and understands that any supply made under these terms is made by BMJ to the Submitting Author unless you are acting as an employee on behalf of your employer or a postgraduate student of an affiliated institution which is paying any applicable article publishing charge ("APC") for Open Access articles. Where the Submitting Author wishes to make the Work available on an Open Access basis (and intends to pay the relevant APC), the terms of reuse of such Open Access shall be governed by a Creative Commons licence – details of these licences and which [Creative Commons](#) licence will apply to this Work are set out in our licence referred to above.

Other than as permitted in any relevant BMJ Author's Self Archiving Policies, I confirm this Work has not been accepted for publication elsewhere, is not being considered for publication elsewhere and does not duplicate material already published. I confirm all authors consent to publication of this Work and authorise the granting of this licence.

1  
2  
3 1 **A pre-emptive Oral Cholera Vaccine (OCV) mass vaccination campaign in Cuamba District, Niassa**  
4  
5 2 **Province, Mozambique: feasibility, vaccination coverage, and delivery costs using CholTool**  
6  
7 3

8  
9 4 Jucunú J. Elias Chitio<sup>1</sup>, Cynthia Semá Baltazar<sup>1</sup>, José Paulo Langa<sup>1</sup>, Liliana Dengo Baloi<sup>1</sup>, Ramos B. J.  
10 5 Mboane<sup>2</sup>, José Alberto Manuel<sup>2</sup>, Sadate Assane<sup>2</sup>, Alide Omar<sup>3</sup>, Mariana Manso<sup>3</sup>, Igor Capatine<sup>1</sup>, Craig  
11 6 Van Rensburg<sup>4</sup>, Naira Luiz<sup>1,4</sup>, Vittal Mogasale<sup>4</sup>, Florian Marks<sup>4,5</sup>, Se Eun Park<sup>4,6,#</sup> and Namseon Beck<sup>4,7</sup>  
12  
13  
14  
15  
16  
17

18 8 <sup>1</sup> National Institute of Health, Maputo, Mozambique

19  
20 9 <sup>2</sup> Provincial Health Directorate, Niassa, Mozambique

21  
22 10 <sup>3</sup> District Health Directorate, Cuamba, Mozambique

23  
24 11 <sup>4</sup> International Vaccine Institute, SNU Research Park, 1 Gwanak-ro, 1 Gwanak-gu, Seoul, 08826,  
25 12 Republic of Korea

26  
27 13 <sup>5</sup> The Department of Medicine, The University of Cambridge, United Kingdom

28  
29 14 <sup>6</sup> Graduate School of Public Health, Yonsei University, 50 Yonsei-ro, Seodaemun-gu, Seoul, 03722,  
30 15 Republic of Korea

31  
32 16 <sup>7</sup> MEDAIR, Switzerland  
33  
34  
35  
36  
37  
38

39 18 # Corresponding author:

40  
41 19 Se Eun Park, PhD; International Vaccine Institute, 1 Gwanak-ro, 1 Gwanak-gu, Seoul, 151-742; Republic  
42 20 of Korea; T: +82-2-881-1154; Email: SeEun.Park@ivi.int  
43  
44  
45  
46  
47  
48  
49  
50  
51  
52  
53  
54  
55  
56  
57  
58  
59  
60

1  
2  
3 **22 Abstract**  
4  
5  
6 **23**

7 **24 Introduction:** Mozambique suffers from regular floods along its principal river basins and periodic  
8  
9  
10 **25** cyclones that resulted in several cholera epidemics during the last decades. Cholera outbreaks in the  
11  
12 **26** recent five years affected particularly the northern provinces of the country including Nampula and  
13  
14 **27** Niassa provinces. A pre-emptive Oral Cholera Vaccine (OCV) mass vaccination campaign was conducted  
15  
16 **28** in Cuamba District, Niassa Province, and the feasibility, costs, and vaccination coverage assessed.  
17

18 **29**  
19  
20 **30 Methods:** World Health Organization prequalified OCV (Euvichol-Plus), a killed whole-cell bivalent  
21  
22 **31** vaccine containing *Vibrio cholerae* O1 (classical and El Tor) and O139, was administered in two-doses  
23  
24 **32** with a 15-day interval during 7-31 August 2018, targeting around 180,000 people aged above one year in  
25  
26 **33** Cuamba District. Microplanning, community sensitization, and trainings of local public health  
27  
28 **34** professionals and field enumerators were conducted. Feasibility and costs of vaccination were assessed  
29  
30 **35** using CholTool. Vaccination coverage and barriers were assessed through community surveys.  
31  
32  
33 **36**

34  
35 **37 Results:** The administrative coverage of the first and second rounds of the campaign were 98.9%  
36  
37 **38** (194,581) and 98.8% (194,325) respectively based on the available population data that estimated total  
38  
39 **39** 196,652 inhabitants in the target area. The vaccination coverage survey exhibited 75.9% ( $\pm 2.2\%$ ) and  
40  
41 **40** 68.5% ( $\pm 3.3\%$ ) coverages for the first and second rounds, respectively. Overall, 60.4% ( $\pm 3.4\%$ ) of the  
42  
43 **41** target population received full two-doses of OCV. Barriers to vaccination included incompatibility  
44  
45 **42** between working hours and campaign time. No severe adverse events were notified. The total financial  
46  
47 **43** cost per dose delivered was US\$0.60 without vaccine cost and US\$1.98 including vaccine costs.  
48  
49  
50 **44**

51  
52 **45 Conclusion:** The pre-emptive OCV mass vaccination campaign in remote setting in Mozambique was  
53  
54 **46** feasible with reasonable full-dose vaccination coverage to confer sufficient herd immunity for at least the  
55  
56  
57  
58  
59  
60

1  
2  
3 47 next three to five years. The delivery cost estimate indicates that the OCV campaign is affordable as it is  
4  
5 48 comparable to Gavi's operational support for vaccination campaigns.  
6

7 49

9 50 **Key words:** Cholera, OCV, pre-emptive vaccination, Cuamba, Mozambique, vaccination coverage  
11 51 survey, feasibility, vaccination cost  
12  
13  
14  
15  
16  
17  
18  
19  
20  
21  
22  
23  
24  
25  
26  
27  
28  
29  
30  
31  
32  
33  
34  
35  
36  
37  
38  
39  
40  
41  
42  
43  
44  
45  
46  
47  
48  
49  
50  
51

For peer review only

## 52 **Strengths and limitations of this study**

- 53 • This study has successfully demonstrated the feasibility of an OCV mass vaccination campaign in a  
54 remote setting in Mozambique.
- 55 • The cost of a mass vaccination campaign for the two-dose OCV administrations has been analysed for  
56 the first time in Mozambique, which can serve as a reference cost estimate when planning for any  
57 OCV vaccination programs in a similar setting in Mozambique or other countries.
- 58 • Vaccination coverage estimates may be affected if there are people movements in and out of the study  
59 area. A sub-study on this and a focused community engagement strategy to reduce the identified  
60 barriers to vaccination should be considered in future vaccination programs.
- 61 • Newly introduced vaccination monitoring/coverage survey engaging the same survey team enabled  
62 quick availability of the vaccination coverage during or immediately after the campaign, but at the  
63 same time the team could be overburdened.

## 65 **Introduction**

66 Cholera is a vaccine preventable disease that remains as a major public health concern in many parts of  
67 low- and middle-income countries (LMICs). A comprehensive policy measure is warranted to control and  
68 prevent cholera including investments in improving infrastructure and knowledge, attitude, and behavior  
69 associated with water, sanitation, and hygiene (WASH), strengthening health system, and adequate use of  
70 oral cholera vaccine (OCV) (1). In Mozambique, cholera has been endemic since the early 1970's when  
71 the first cholera outbreak was reported in the country. Several epidemics followed since then including  
72 the outbreaks in 1997-1999 and 2012-2016 (2, 3). Cholera outbreaks are more frequent in the country's  
73 northern provinces including Nampula, Cabo Delgado, Tete, and Niassa (4). Following the reinforcement  
74 of cholera outbreak response strategies, the Ministry of Health (MOH) of Mozambique has carried out  
75 several OCV mass vaccination campaigns, as recommended by the World Health Organization (WHO) as  
76 an integral part of a comprehensive strategy for cholera prevention and control in endemic setting along



1  
2  
3 77 with primary interventions of WaSH measures (5): Recent cholera outbreaks in these cholera endemic and  
4  
5 78 hotspot areas in December 2015 resulted in the use of global OCV emergency stockpile to vaccinate  
6  
7 79 approximately 212,745 people living in six neighborhoods of Nampula city in 2016 (4); and in April  
8  
9 80 2017, another 709,077 doses from the stockpile to vaccinate approximately 354,550 people in Tete City  
10  
11 81 and Moatize and Mutarara districts, in response to the cholera outbreak with over 3,592 cholera cases.  
12  
13  
14 82

15  
16 83 In addition to these reactive vaccination campaigns supported by the WHO International Coordinating  
17  
18 84 Group (ICG) on vaccine provision for cholera, a growing need for a preventive public health intervention  
19  
20 85 using a targeted vaccination approach in cholera priority areas in-country was identified. The past records  
21  
22 86 of numerous episodes of cholera epidemics in Mozambique have spotted at-risk districts in the most  
23  
24 87 cholera endemic provinces such as Nampula (particularly Nampula City), Niassa (Lichinga city and  
25  
26 88 Cuamba and Lago Districts), and Cabo Delgado (Pemba City and Ancuabe District), and to a lesser  
27  
28 89 degree, other provinces and districts with limited sanitary conditions (5). Niassa province, one of the  
29  
30 90 cholera endemic regions with annual cholera outbreaks affecting largely the Lichinga City and Lago and  
31  
32 91 Cuamba Districts, was identified for a planned pre-emptive vaccine introduction to prevent subsequent  
33  
34 92 cholera outbreaks. Cuamba District with an estimated population of 264,572 (6), reports over 200  
35  
36 93 suspected cholera and 2,000 diarrheal cases almost every year, with an exception of 2014 and 2016 (7).  
37  
38 94 Here, we describe the feasibility, costs, and coverage estimates associated with a pre-emptive OCV mass  
39  
40 95 vaccination campaign conducted in Cuamba District using two-dose OCVs (Euvichol-Plus) administered  
41  
42 96 to approximately 180,000 people with a 15-day interval between the doses, as well as challenges of  
43  
44 97 delivering healthcare in resource limited rural setting in Mozambique.  
45  
46  
47 98

## 49 99 **Methods**

### 51 52 100 53 54 101 ***Study site and population***

1  
2  
3 102 The Cuamba District is located in Niassa Province with a population size of around 264,572 (6). The site  
4  
5 103 was selected for a pre-emptive OCV mass vaccination campaign as the district includes the Cuamba  
6  
7 104 Municipality area where cholera is found to be endemic with periodic outbreaks. The area was also  
8  
9 105 highlighted by the WHO as one of the priority sites to consider for a potential OCV intervention during a  
10  
11 106 needs-assessment performed in September 2015 (1). The District of Cuamba is composed of a total 36  
12  
13 107 bairros and povoados with population size of approximately 264,572 (6), which includes 21 bairros in the  
14  
15 108 Cuamba Municipality area with around 137,640 residents (8). In total, approximately 180,000 individuals  
16  
17 109 living in Cuamba District was targeted initially, and ultimately around 196,652 people living in Cuamba  
18  
19 110 District were targeted, which included 20 Bairros in the Municipality area and 10 Povoados in the  
20  
21 111 outskirts of the Municipality area (Figure 1). Selection of bairros and povoados in the outskirts of  
22  
23 112 Cuamba Municipality within the District was made not only based on the high number of doses destined  
24  
25 113 for the target population in the municipality area, but also the records of cholera cases during the  
26  
27 114 outbreaks. Everyone above one year of age were eligible for the two-dose OCV administration.  
28  
29  
30  
31  
32

### 33 116 ***Vaccine delivery, storage, and handling***

34  
35 117 Approximately 360,000 doses of WHO pre-qualified Euvichol-Plus, a killed whole-cell bivalent OCV  
36  
37 118 containing *Vibrio cholerae* O1 (classical and El Tor) and O139, were procured from the manufacturer  
38  
39 119 (EuBiologics) and shipped to the entry port in Pemba, Mozambique in cold-chain. Upon arrival in  
40  
41 120 Mozambique, the vaccines were delivered to Lichinga by airfreight and transported to a central vaccine  
42  
43 121 storage room in Cuamba project site, and kept in refrigerators with temperature maintained within range  
44  
45 122 between 2-8°C until and throughout the campaign. The vaccine vial monitor (VVM) and electronic  
46  
47 123 shipping indicators (Q-Tag) were used to monitor the temperature of the vaccines during delivery,  
48  
49 124 storage, and handling. During the vaccination campaign, cool boxes with dry ice maintained within 2-8°C  
50  
51  
52 125 were used to carry the vaccines to the vaccination posts.  
53  
54  
55  
56  
57  
58  
59  
60

### 127 ***Cost of vaccine delivery***

128 An openly available, standardized and validated Excel-based tool known as the CholTool was used for  
129 estimating vaccine delivery costs (9). This tool comprehensively estimates programmatic costs such as  
130 microplanning, communication and training materials development, sensitization/social mobilization, and  
131 personnel training, as well as costs related to vaccine delivery such as vaccine procurement, handling,  
132 storage, and transport, vaccination administration, adverse events following immunization (AEFI)  
133 management, monitoring supervision, and field support. The CholTool has the ability to estimate both  
134 financial and economic costs. Financial costs refer to the monetary costs to the payer (e.g., allowances,  
135 supplies, transport, and resources used in micro-planning, training, and sensitization/social mobilization)  
136 while economic costs include financial costs along with non-monetary costs of donated goods and  
137 resources already available (e.g., health personnel time). Key informant interviews were conducted at  
138 various administrative levels before, during and after the vaccination campaign in order to identify the  
139 resources necessary for each vaccination related activity and costs of respective resources for each of the  
140 two rounds of vaccination. The resource and cost data were entered in CholTool which auto-calculates  
141 OCV delivery costs. The costs were reported in 2018 in United States Dollars (US\$) based on  
142 government and payer perspective.

### 144 ***Vaccination Strategy and microplanning***

145 A fixed post vaccination strategy with additional mobile teams was adapted for the microplanning of the  
146 vaccination campaign. The vaccination teams for 15 fixed posts and 33 mobile teams were identified and  
147 trained prior to the campaign. The fixed posts included existing healthcare facilities such as primary  
148 health centers and secondary and referral hospital, schools, market areas where many people have easy  
149 access to. The mobile teams were deployed to households remotely located with limited access to these  
150 fixed posts. This adopted mixed vaccination strategy aimed to improve quality, accessibility, and  
151 coverage. Each post was staffed with around 5 field workers including 2 health workers and 3 community  
152 engagement workers. Five days prior to the vaccination campaign, micro-plans for each cluster were

1  
2  
3 153 prepared with postal addresses, target populations, vaccination dates, teams, and other site-specific  
4  
5 154 resources. The health workers obtained verbal informed consents from the individuals visiting the  
6  
7 155 vaccination posts for the OCV administration. Pregnant women by self-report or infants below one year  
8  
9 156 old were excluded from the vaccination. Vaccination cards and vaccination registry book were developed  
10  
11 157 and deployed, specific to this vaccination that included variables such as name, age, address, and  
12  
13 158 vaccination date. The collected data in the vaccine registry book were entered in an excel-based database.  
14  
15 159 The number of doses planned and administered were also recorded daily for each rounds of the  
16  
17 160 vaccination campaign.  
18  
19  
20  
21

### 22 162 ***Vaccination, adverse event monitoring, and coverage estimate***

23  
24 163 The vaccination campaign occurred in two rounds with a 15-day interval. The first round took place  
25  
26 164 during August 7-11, followed by the second round during August 27–31, 2018. Provision was made for  
27  
28 165 mop-up activities after the second round for those who missed the second dose. To detect any possible  
29  
30 166 adverse events following immunization (AEFI) during and after the campaign, health workers were  
31  
32 167 trained to monitor and notify any adverse events encountered in inpatient and outpatient admissions at  
33  
34 168 Cuamba health facilities from the first day of each round throughout the 15 days after the last day of each  
35  
36 169 round.  
37  
38  
39  
40

41 171 The vaccination coverage estimates were assessed in two-folds; administrative coverage and coverage  
42  
43 172 surveys. The administrative coverage was recorded by the local government health office in charge of the  
44  
45 173 vaccination campaign by tracking the number of vaccine doses administered compared to doses that had  
46  
47 174 been planned in the vaccination target areas, at the end of vaccination activities every day during the two  
48  
49 175 rounds of the OCV vaccination campaign. For the vaccination coverage surveys, around 520-650  
50  
51 176 households, subject to the vaccination schedule including the mop-up vaccination, were estimated to  
52  
53 177 ensure more than 550 samples for each age group (1-4 years, 5-14 years, 15 years and above) assuming  
54  
55 178 80% coverage with a design effect of 2 to achieve around 5% of prevision. Sampled households were  
56  
57  
58  
59  
60

1  
2  
3 179 organized per cluster; total 20-25 clusters with 26 households per cluster. The households were selected  
4  
5 180 using a two-stage cluster random sampling methodology. Clusters (primary sampling unit) were selected  
6  
7 181 from the list of villages in the Health Zones, according to the Probability Proportional to Population Size  
8  
9 182 (PPS) and households (secondary sampling unit) were chosen randomly. For the household random  
10  
11 183 sampling, the enumerators identified the center point and boundary of the survey target area and applied  
12  
13 184 random selection of households. The surveyors were recruited based on their knowledge on the local area  
14  
15 185 and level of education to conduct the survey, and trained on household sampling methodology, structured  
16  
17 186 survey questionnaire, and process of conducting a survey interview, including verbal informed consent  
18  
19  
20 187 and data capturing on the paper-based survey questionnaires.  
21

22 188 **F**

23  
24 189 **Five** survey teams were deployed to the predetermined clusters for daily vaccination monitoring, where  
25  
26 190 randomly identified 26 households per cluster (5 clusters with total 130 households per day) were visited  
27  
28 191 for 4-5 days (total 520-650 households) from the second or third day of the campaign until one day after  
29  
30 192 the last vaccination day. This was applied for each round of the two-dose OCV vaccination campaigns.  
31  
32 193 The information gathered through the survey on the vaccine uptake in the previous day, barriers against  
33  
34 194 the vaccination, and the information source on the campaign were analyzed and fed daily to the  
35  
36 195 vaccination campaign coordinators and supervisors in order to facilitate overall vaccine uptakes. During  
37  
38 196 the second-round of campaign, the survey team collected data for the first-round coverage using the same  
39  
40 197 questionnaire for monitoring, which enabled the first-round vaccine coverage available before the  
41  
42 198 completion of the second round. After the second round, the enumerators continued the household survey  
43  
44 199 for additional three days (total four days, including the last survey day for monitoring of the second  
45  
46 200 round, which was one day after the mop-up campaign) to estimate the coverage for the second round and  
47  
48 201 two full doses of vaccination.  
49

50  
51 202

52  
53 203 ***Patient and Public Involvement***  
54  
55  
56  
57  
58

1  
2  
3 204 The vaccination campaign was conducted as a part of the government's public health intervention,  
4  
5 205 approved by the Ministry of Health (MOH) in Mozambique. The participants in this study were people  
6  
7 206 living in the cholera endemic and hotspot area, targeted for OCV vaccination campaign as an integral part  
8  
9 207 of the government's cholera prevention efforts. The vaccination target population living in Cuamba  
10  
11 208 District were sensitized and engaged, prior to and during the vaccination campaign, by the district and  
12  
13 209 provincial health officials, study team that included the MOH and National Institute of Health  
14  
15 210 government officials, and local public health professionals at healthcare facilities. The participants were  
16  
17 211 provided with information on the planned OCV mass vaccination such as the purpose of pre-emptive  
18  
19 212 vaccination and detailed information on where and when the vaccination campaigns were to take place.  
20  
21 213 The vaccination campaign was also announced through various press and social media in Mozambique  
22  
23 214 for public awareness and involvement. The study was conducted in a transparent manner with open  
24  
25 215 communication and information sharing in the community, and participants to the OCV vaccination and  
26  
27 216 vaccination coverage surveys were informed for oral consent. For children, consents were obtained from  
28  
29 217 parents/guardian and all adult participants provided their own consent. The study did not present any risk  
30  
31 218 of harm to subjects. No biological samples were collected. Minimum data was collected from  
32  
33 219 participants, whereby privacy and confidentiality of the data were ensured during the survey  
34  
35 220 implementation and data entry and management. Stakeholder meetings were conducted prior to, during,  
36  
37 221 and after the vaccination campaign to further disseminate the campaign plan and results to the community  
38  
39 222 members.  
40  
41  
42  
43  
44

## 45 224 **Results**

### 46 225 *OCV vaccination coverage*

47  
48  
49 226 The administrative coverage of the first and the second rounds of the campaign were 98.9% (194,581) and  
50  
51 227 98.8% (194,325) respectively based on the available census data of vaccination target population in  
52  
53 228 Cuamba Municipality and outskirts, estimated at around 196,652 (6) inhabitants (Table 1). A total of  
54  
55 229 194,581 people over one-year-old received the first dose, out of whom 99,275 were females and 122,592  
56  
57  
58  
59  
60

1  
2  
3 230 were children aged less than 15 years. For the second round, total 194,325 people were vaccinated,  
4  
5 231 including 99,275 females and 120,169 children less than 15 years old. Notably, the vaccination coverage  
6  
7 232 survey conducted in the target community during each round and post-vaccination exhibited an  
8  
9 233 approximate coverage estimates of 75.9% (95 CI, 73.10 - 78.70%) for the first round and 68.5% (71.80 -  
10  
11 234 65.20%) for the second round. The coverage rate for the full two-doses was estimated at 60.4% (63.80 -  
12  
13 235 57.00%), whereby the coverage of children aged 1-4 years was around 64.4 % (57.10 – 71.10%) (Table  
14  
15 236 1). The coverage rates in each round were higher in male (76.3% and 77.8%) than female (75.4% and  
16  
17 237 67.7%), but coverage rate of full doses was higher in female (64.4%) than male (57.3%). No adverse  
18  
19 238 events were reported during and after the vaccination activities, monitored up to 14 days post-vaccination  
20  
21 239 campaign.  
22  
23  
24  
25  
26  
27  
28  
29  
30  
31  
32  
33  
34  
35  
36  
37  
38  
39  
40  
41  
42  
43  
44  
45  
46  
47  
48  
49  
50  
51  
52  
53  
54  
55  
56  
57  
58  
59  
60

241 **Table 1. OCV vaccination coverage estimates, Cuamba District, 2018**

242

243 **a) Administrative vaccination coverage rates**

244

|                                           |                   | Number of people vaccinated (No.) |               |               |               |               |               |               |
|-------------------------------------------|-------------------|-----------------------------------|---------------|---------------|---------------|---------------|---------------|---------------|
|                                           |                   | Day 1                             | Day 2         | Day 3         | Day 4         | Day 5         | Day 6         | Total         |
| <b>1<sup>st</sup> Dose</b>                | <b>Age (year)</b> |                                   |               |               |               |               |               |               |
| Individuals vaccinated per                | 1-4               | 6,493                             | 9,283         | 12,394        | 12,506        | 7,691         | -             | 48,367        |
| age group                                 | 5-15              | 7,050                             | 16,705        | 21,590        | 17,536        | 11,344        | -             | 74,225        |
|                                           | ≥15               | 10,136                            | 12,400        | 18,835        | 18,798        | 11,820        | -             | 71,989        |
| Total no. of daily vaccinated             |                   | 23,679                            | 38,388        | 52,819        | 48,840        | 30,855        | -             | 194,581       |
| Cumulative no. of vaccinated              |                   | 23,679                            | 62,067        | 114,886       | 163,726       | 194,581       | -             |               |
| <b>Cumulative administrative coverage</b> |                   | <b>12.04%</b>                     | <b>31.56%</b> | <b>58.42%</b> | <b>83.26%</b> | <b>98.95%</b> | -             | <b>98.95%</b> |
| <b>2<sup>nd</sup> Dose</b>                |                   |                                   |               |               |               |               |               |               |
| Individuals vaccinated per                | 1-4               | 5,479                             | 6,484         | 11,117        | 9,596         | 7,760         | 7,586         | 48,022        |
| age group                                 | 5-15              | 9,355                             | 8,796         | 15,679        | 13,208        | 14,444        | 10,665        | 72,147        |
|                                           | ≥15               | 9,416                             | 9,275         | 14,271        | 14,265        | 14,848        | 12,081        | 74,156        |
| Total no. of daily vaccinated             |                   | 24,250                            | 24,555        | 41,067        | 37,069        | 37,052        | 30,332        | 194,325       |
| Cumulative no. of vaccinated              |                   | 24,250                            | 48,805        | 89,872        | 126,941       | 163,993       | 194,325       |               |
| <b>Cumulative administrative coverage</b> |                   | <b>12.33%</b>                     | <b>24.82%</b> | <b>45.70%</b> | <b>64.55%</b> | <b>83.39%</b> | <b>98.82%</b> | <b>98.82%</b> |

245

246 **b) Vaccination coverage rates through coverage surveys**

247

|                        |        | First Round      | Second Round     | Full Two Doses   |
|------------------------|--------|------------------|------------------|------------------|
| <b>Age (years old)</b> | 1- 4   | 81.1±4.5%        | 72.2±6.9%        | 64.4±7.3%        |
|                        | 5-14   | 86.4±3.1%        | 71.3±5.8%        | 65.2±6.1%        |
|                        | ≥15    | 67.6±3.3%        | 65.2±4.8%        | 55.7±5.0%        |
| <b>Sex</b>             | Male   | 76.3±2.9%        | 77.8±3.9%        | 57.3±4.6%        |
|                        | Female | 75.4±3.2%        | 67.7±5.0%        | 64.4±5.1%        |
| <b>Total</b>           | -      | <b>75.9±2.2%</b> | <b>68.5±3.3%</b> | <b>60.4±3.4%</b> |

248



### 249 *Source of Information and Acceptability*

250 The source of information on the OCV vaccination campaign, identified by the populations living in the  
 251 vaccination target areas, showed use of megaphone as the most effective tool in disseminating  
 252 information on the vaccination plan and mobilizing the community to get immunized for both rounds:  
 253 24% and 34% at the first and second rounds respectively (Table 2). Around 15% of the surveyed people  
 254 in the target community indicated that they have learnt about the vaccination campaign through radio  
 255 broadcast for the first round, but its communication impact reduced in the second round (4%). This was  
 256 different for the community leaders, whose contribution increased from 5% in the first round to 19% in  
 257 the following round, reflecting their active engagement and communication efforts in close coordination  
 258 with the vaccination teams on the ground.

260 **Table 2. Source of information on OCV campaign, Cuamba District, 2018**

| Source of information | 1 <sup>st</sup> Round <sup>1</sup><br>N= 646<br>n (%=n/N) | 2 <sup>nd</sup> Round <sup>2</sup><br>N= 578<br>n (%=n/N) |
|-----------------------|-----------------------------------------------------------|-----------------------------------------------------------|
| Megaphone             | 152 (24%)                                                 | 195 (34%)                                                 |
| Family                | 60 (9%)                                                   | 53 (9%)                                                   |
| Radio                 | 96 (15%)                                                  | 23 (4%)                                                   |
| Religious leader      | 82 (13%)                                                  | 25 (4%)                                                   |
| Health workers        | 74 (11%)                                                  | 120 (21%)                                                 |
| Activists             | 55 (9%)                                                   | 9 (2%)                                                    |
| Community leader      | 33 (5%)                                                   | 108 (19%)                                                 |
| TV                    | 14 (2%)                                                   | 11 (2%)                                                   |
| Others <sup>3</sup>   | 78 (12%)                                                  | 33 (6%)                                                   |

262 Footnote:

263 <sup>1</sup> 1<sup>st</sup> round: 646 households/or people were interviewed.

264 <sup>2</sup> 2<sup>nd</sup> round: 578 households/or people were interviewed.

265 <sup>3</sup> Others included: list other source of info if such data were collected.

268 ***Reasons for not being vaccinated***

269 The unavailability (absence) of the target population for vaccination and incompatibility between working  
 270 hours and campaign schedule were commonly cited as barriers for vaccination in both the first (35%) and  
 271 the second round (51%) (Table 3). Absence of vaccinators at the vaccination sites were also mentioned,  
 272 12% and 18% for the first and second round respectively, despite the pre-vaccination planning and  
 273 programmatic organization. Notably, around 10% of the target population has indicated that they have not  
 274 been informed about the vaccination campaign even in the second round, though this was a reduction  
 275 compared to 18% in the first round. In order to address the most common barriers identified in the first  
 276 round, the second round of the vaccination campaign was further extended for additional few days  
 277 including the weekends, enabling more people to get vaccinated.

278

279 **Table 3. Reasons for non-vaccination during the OCV campaign, Cuamba District, 2018**

280

| Reasons for non-vaccination                             | 1 <sup>st</sup> Dose |     | 2 <sup>nd</sup> Dose |     |
|---------------------------------------------------------|----------------------|-----|----------------------|-----|
|                                                         | n=361                | %   | n=222                | %   |
| Unavailable                                             | 63                   | 17% | 96                   | 43% |
| Incompatibility between working hours and campaign time | 53                   | 15% | 18                   | 8%  |
| Vaccination post without vaccinator                     | 40                   | 11% | 41                   | 18% |
| Did not have information                                | 66                   | 18% | 23                   | 10% |
| Ill during the vaccination period                       | 30                   | 8%  | 10                   | 5%  |
| Does not believe in vaccine efficacy                    | 24                   | 7%  | 2                    | 1%  |
| Afraid of adverse events                                | 8                    | 2%  | 0                    | 0%  |
| Head of the family did not authorize                    | 4                    | 1%  | 2                    | 1%  |
| Religious leader forbid                                 | 2                    | 1%  | 0                    | 0%  |
| Considered not safe for pregnant women                  | 1                    | 0%  | 2                    | 1%  |
| Other                                                   | 70                   | 19% | 28                   | 13% |

281

1  
2  
3 282 ***OCV delivery costs***  
4

5 283 The total financial cost of campaign was US\$768,904 of which vaccine acquisition including vaccine  
6  
7 284 shipment constituted 69% (US\$533,659) (Table 4). The vaccine delivery costs including, microplanning,  
8  
9 285 training, communication, and social mobilization, vaccination implementation (Round 1 & 2) constituted  
10  
11 286 rest 31% (US\$235,245). The total financial cost per dose delivered was US\$0.60 without the vaccine cost  
12  
13  
14 287 and US\$1.98 including the vaccine costs in 2018 price. The economic cost per dose delivered excluding  
15  
16 288 vaccine costs was five times higher at US\$3.02. The total financial cost of delivery per fully immunized  
17  
18 289 person excluding vaccine costs was US\$1.21.  
19

20 290  
21  
22  
23  
24  
25  
26  
27  
28  
29  
30  
31  
32  
33  
34  
35  
36  
37  
38  
39  
40  
41  
42  
43  
44  
45  
46  
47  
48  
49  
50  
51  
52  
53  
54  
55  
56  
57  
58  
59  
60

291 **Table 4. Costs of OCV vaccine delivery and immunization in Cuamba District**

292

| <b>Vaccine Delivery Costs</b>                        | <b>Financial Cost<br/>(Mzn)</b> | <b>Economic Cost<br/>(Mzn)</b> | <b>Financial Cost<br/>(USD)</b> | <b>Economic Cost<br/>(USD)</b> |
|------------------------------------------------------|---------------------------------|--------------------------------|---------------------------------|--------------------------------|
| Vaccine Acquisition                                  | 32,179,644                      | 42,081,073                     | 533,659                         | 697,862                        |
| Microplanning                                        | 640,415                         | 7,596,625                      | 10,620                          | 125,981                        |
| Training                                             | 265,186                         | 299,419                        | 4,398                           | 4,965                          |
| Communication and Social Mobilization                | 1,912,520                       | 4,301,342                      | 31,717                          | 71,332                         |
| Vaccination Implementation (Round 1 &2)              | 11,367,160                      | 58,510,806                     | 188,510                         | 970,328                        |
| <b>Total</b>                                         | <b>46,364,925</b>               | <b>112,789,265</b>             | <b>768,904</b>                  | <b>1,870,469</b>               |
| <b>Immunization Costs</b>                            | <b>Financial Cost<br/>(Mzn)</b> | <b>Economic Cost<br/>(Mzn)</b> | <b>Financial Cost<br/>(USD)</b> | <b>Economic Cost<br/>(USD)</b> |
| Cost per Vaccine Administered (including vaccine)    | 119                             | 290                            | 1.98                            | 4.81                           |
| Cost per Vaccine Administered (without vaccine cost) | 36                              | 182                            | 0.60                            | 3.02                           |
| Cost per Partially Immunized Person                  | 238                             | 580                            | 3.95                            | 9.61                           |
| Cost per Fully Immunized Person (with vaccine)       | 239                             | 580                            | 3.96                            | 9.63                           |
| Cost per Fully Immunized Person (without vaccine)    | 73                              | 364                            | 1.21                            | 6.03                           |

293

## 294 Discussion

295 The OCV campaign in Cuamba District was organized without major logistical and programmatic  
296 challenges, and no adverse events were reported throughout the vaccination activities and up to 14 days  
297 after the campaign. Despite the similarity in the number of people vaccinated in the first and second  
298 rounds, the vaccination coverage survey of the second round showed lower coverage estimates than the  
299 first round. This may be due to possible cross border movement of people from untargeted districts to get  
300 vaccination during the second round. The vaccination coverage for the full two-doses was over 60% that  
301 may confer sufficient herd immunity for the following several years based on the existing literature on a  
302 cholera transmission model using the Matlab data from Bangladesh (10,11), which predicted 50%  
303 coverage with OCV in cholera endemic areas may result in 89% reduction in cholera cases in  
304 unvaccinated (12).

305  
306 In our study, children aged 5-14 years exhibited the highest coverage. This may be due to the vaccination  
307 posts in both schools (fixed vaccination post) and near homes (mobile vaccination posts), which  
308 facilitated the school-aged children to access the immunization health service more easily. The female  
309 group also presented higher full vaccination coverage rate compared to the male group, who showed  
310 higher drop-out after first dose, likely associated with their routine boundaries of livelihood near their  
311 houses or their child/children's schools as they take care of children while the male group typically work  
312 outside. This assumption is supported by the fact that the absence during the campaign was identified as a  
313 significant barrier against vaccination during both rounds of the campaign. Similar pattern was  
314 consistently prevalent in the previous OCV campaigns in Beira (13) and Nampula (4), whereby absence  
315 was the main barrier for vaccination. The second round of the campaign coincided with the period of  
316 school holidays when most households move to farming and food production, resulting in higher absence  
317 rate in the second round (43.0%) than in first round (17.0%). Further, it is encouraging to observe more  
318 than 60% vaccination coverage rate among children aged 1-4 years, the most at-risk population age-group  
319 concerning cholera outbreaks. Considering that caregivers for these younger children are mostly women,

1  
2  
3 320 higher vaccination coverage for these toddlers and younger children and women is as anticipated in  
4  
5 321 accordance with other studies published in similar settings (14).  
6

7 322  
8  
9 323 For real time monitoring of the OCV vaccination campaign, the researchers have employed a  
10  
11 324 representative sampling (two stage cluster sampling) instead of conventional convenient sampling, where  
12  
13 325 the new approach assessed only 1/5 of the predetermined households and demanding five days reaching  
14  
15 326 full households for optimal precision. This new approach has several advantages including 1) availability  
16  
17 327 of representative daily coverage, and barriers, which were fed to the coordination team on a real time  
18  
19 328 bases despite limited precision, 2) the first round vaccine coverage became available before the end of the  
20  
21 329 second round, and finally 3) the vaccine coverage was available immediately after each round without a  
22  
23 330 separate post vaccination coverage survey using ‘measurement error approach (15)’ (the details have not  
24  
25 331 been discussed here, but in a separate article currently under development). Again, the second and full  
26  
27 332 dose vaccine coverage were estimated within a week after the campaign by extension of the survey days  
28  
29 333 by three more days. However, the survey extension and additional questions for the final coverages (the  
30  
31 334 first, second and full) made some survey team members exhausted, which might have affected survey  
32  
33 335 quality.  
34  
35  
36  
37 336

38  
39 337 In order to enhance the vaccination coverage, it is paramount to better understand the effective means of  
40  
41 338 communications for community sensitization and engagements, as well as barriers towards participating  
42  
43 339 in a vaccination program such as this campaign. Here, we showed that the use of megaphone proved to be  
44  
45 340 the most effective advocacy tool for disseminating information on the vaccination to our target  
46  
47 341 community, which may have allowed the field workers to reach out to families without access to other  
48  
49 342 sources of information. This may also indicate the need to better understand the inter-personnel  
50  
51 343 communication and community mobilization approach for future vaccination campaigns. For those with  
52  
53 344 missed opportunities to receive the OCV doses during the two rounds, a mop-up vaccination can be  
54  
55 345 considered, though it is often more laborious and costly, requiring a complex management (13). Further,  
56  
57  
58  
59  
60

1  
2  
3 346 informing the public on the availability of a mop-up prior to or during the campaign may negatively affect  
4  
5 347 their participation in the regular vaccination schedule set-up. Hence, a mop-up was not considered after  
6  
7 348 the first round in our approach but pursued after the second round in order to enhance the full two-dose  
8  
9 349 vaccination and verify vaccination data records submitted during the regular program. Approximately  
10  
11 350 15.4% (32,775/212,824) of the delivered second doses were through this mop-up campaign indicative of  
12  
13 351 an effective strategy.  
14  
15

16 352  
17  
18 353 The financial costs of OCV delivery per fully immunized person in this campaign was lower than delivery  
19  
20 354 costs reported in other African countries using the same CholTool (US\$1.8 in Shashemene district of  
21  
22 355 Ethiopia; US\$2.5 in Nsanje district of Malawi; and US\$3.5 in Machinga, Phalombe, and Zomba districts  
23  
24 356 of Malawi per the US\$ price value of 2016), but closer to that reported in Puri district of India (US\$1.14  
25  
26 357 per the US\$ price value of 2016) (9). One reason could be that Mozambique has experience of conducting  
27  
28 358 several OCV campaigns in recent years, and hence there were already resources and expertise available  
29  
30 359 for micro-planning, communication, sensitization, trainings etc., which might have reduced the costs  
31  
32 360 associated with introduction of vaccines in comparison to a vaccination program in naïve setting. The  
33  
34 361 financial cost of US\$0.60 per dose delivered (excluding vaccine procurement) is comparable to the  
35  
36 362 operational support ranging between US\$0.30 and US\$0.80 per person targeted for vaccination  
37  
38 363 campaigns, recommended by the Gavi, the Vaccine Alliance (16,17). This indicates the affordability of  
39  
40 364 OCV campaign in the current setting. To economize the healthcare provider time and efforts and  
41  
42 365 incentivize beneficiaries for greater uptake of vaccines, delivery of multiple products at vaccination posts  
43  
44 366 or on household visits may potentially synergize the delivery cost associated with vaccination campaigns.  
45  
46  
47

48 367  
49  
50 368 Overall, our study proved the feasibility of conducting a preemptive OCV mass vaccination campaign in a  
51  
52 369 rural and semi-rural setting in Cuamba District and Cuamba Municipality areas respectively, with  
53  
54 370 sufficient coverage rate and relatively lower delivery cost. The success of vaccination was a result of  
55  
56 371 effective coordination and microplanning among stakeholders despite some field challenges. The  
57  
58  
59

1  
2  
3 372 vaccination strategy utilizing both fixed and mobile posts, as well as the daily feedback to the  
4  
5 373 coordination team on the preliminary coverage survey result and data related to barriers and source of  
6  
7 374 information on the vaccination campaign, proved valuable to prospectively refine the campaign and  
8  
9 375 mobilization strategy every day on a real-time basis.  
10

11 376

12  
13 377 However, there are several limitations. First, the operational challenges concerning poor road conditions  
14  
15 378 resulted in the accessibility to the target area difficult. Second, the programmatic support that required  
16  
17 379 sufficient and trained human resources and budget for a sustained field monitoring activity and close on-  
18  
19 380 site supervision prior to and during the vaccination campaign and coverage survey activities. Third, the  
20  
21 381 differences in the coverage rates of administrative data and survey result is due to the lack of accurate up-  
22  
23 382 to-date census data of local population. In addition, in order to avoid any conflict with the measles and  
24  
25 383 rubella national immunization campaign that was taking place across the country at the time of this  
26  
27 384 vaccination campaign, we had to delay our OCV vaccination campaign for about two months to obtain  
28  
29 385 support from immunization-related stakeholders, particularly the expanded programme of immunization  
30  
31 386 (EPI) for cold chain space and logistics. Any mass vaccination campaigns should also consider  
32  
33 387 seasonality and other major community activities and/or any political issues.  
34  
35 388

36 388

### 37 389 **Acknowledgement**

38  
39 390 The authors acknowledge the local government officials and healthcare professionals in Cuamba District,  
40  
41 391 Niassa Province for engaging the community on the OCV vaccination program throughout the planning  
42  
43 392 and implementation period. Thanks are also extended to the people who consented and took part in the  
44  
45 393 coverage survey. We thank our research partners and staff at the MOCA sentinel site networks in  
46  
47 394 Mozambique, and Ms. Somyoung Cho for the project management and Ms. Jihyun Han and Ms. Nozipho  
48  
49 395 Manjate for the project administrative support.  
50  
51 396

52 396

### 53 397 **Contributorship**



1  
2  
3 398 S.E.P conceptualized the overall study design of the Mozambique Cholera Prevention and Surveillance  
4  
5 399 (MOCA) project. C.S.B. supervised the MOCA project in Mozambique. N.S.B. supervised the overall  
6  
7 400 vaccination campaign and monitoring and evaluation. All authors participated in the vaccination  
8  
9 401 campaign. J.C., N.L., L.D.B., J.P.L., N.S.B., S.E.P., S.A., A.O., M.M., and the project field team in  
10  
11 402 Cuamba and Niassa contributed to data acquisition on the community vaccination coverage surveys, and  
12  
13 403 interpretation of results under the supervision of N.S.B. R.B.J.M., J.A.M., S.A., A.O., M.M., and others in  
14  
15 404 the vaccination teams of Cuamba District and Niassa Province contributed to acquisition, review, and  
16  
17 405 report of the administrative coverage data. I.C. contributed to data acquisition and analysis on vaccination  
18  
19 406 costs; and V.M. and C.V.R. reviewed the cost analysis. J.C. drafted and edited the paper under the  
20  
21 407 scientific guidance from N.S.B. and S.E.P. All authors read and approved the final draft.  
22  
23  
24  
25

#### 26 409 **Funding Statement**

27  
28 410 This study was supported by the Korea International Cooperation Agency (KOICA), government of the  
29  
30 411 Republic of Korea. The findings and conclusions are our own and do not necessarily reflect positions of  
31  
32 412 the KOICA. The International Vaccine Institute acknowledges its donors, including the Government of  
33  
34 413 Republic of Korea and the Swedish International Development Cooperation Agency (SIDA).  
35  
36  
37  
38

#### 39 415 **Competing of Interests**

40  
41 416 The authors declare no competing interests.  
42  
43  
44

#### 45 418 **Ethics approval**

46  
47 419 Institutional Ethical Committee of the National Institute of Health (Ref: 116/CNBS/19) and ethical review  
48  
49 420 board of the International Vaccine Institute, Seoul, Korea (IRB number 2017-006) approved the study  
50  
51 421 protocol for the OCV mass vaccination campaign monitoring and coverage survey.  
52  
53  
54

#### 55 423 **Data sharing**

1  
2  
3 424 All data relevant to the study are included in the article.  
4  
5 425  
6  
7 426 **Figure legends**  
8  
9 427  
10  
11 428 **Figure 1. Pre-emptive OCV mass vaccination site**  
12  
13 429  
14

15 430 Location of the pre-emptive OCV vaccination campaign site in Cuamba District, Mozambique, included  
16  
17 431 bairros and povoados in the municipality and district.  
18  
19 432  
20

21 433 **References**  
22

- 23  
24 434 1. Chun-Hai Fung I, Fitter DL, Borse RH, Meltzer MI, Tappero JW. **Modeling the Effect of Water,**  
25  
26 435 **Sanitation, and Hygiene and Oral Cholera Vaccine Implementation in Haiti.** *Am J Trop Med*  
27  
28 436 *Hyg.* 2013 Oct 9;89(4):633–40.  
29  
30 437 2. Langa JP, Sema C, De Deus N, Colombo MM, Taviani E. **Epidemic waves of cholera in the last**  
31  
32 438 **two decades in Mozambique.** *J Infect Dev Ctries* [Internet]. 2015 Jul 4 [cited 2015 Oct 5];9(06).  
33  
34 439 Available from: <http://www.jidc.org/index.php/journal/article/view/6943>  
35  
36 440 3. WHO. 2013. **Cholera country profile: Mozambique.** Global Task Force on Cholera Control.  
37  
38 441 4. Semá Baltazar C, Rafael F, Langa JPM, Chicumbe S, Cavailler P, Gessner BD, *et al.* **Oral cholera**  
39  
40 442 **vaccine coverage during a preventive door-to-door mass vaccination campaign in Nampula,**  
41  
42 443 **Mozambique.** *PloS One.* 2018;13(10): e0198592.  
43  
44 444 5. WHO. **Cholera vaccines: WHO position paper –August 2017.** *Wkly Epidemiol Rec.*  
45  
46 445 2017;92(34):477–498  
47  
48 446 6. Instituto Nacional de Estatística (INE). 2017. **IV Recenseamento Geral da População e Habitação.**  
49  
50 447 **Divulgação os resultados preliminares IV RGPH 2017: Habitação, agregados familiares e**  
51  
52 448 **população, Província de Niassa, p. 3.**  
53  
54  
55  
56  
57  
58  
59  
60

- 1  
2  
3 449 7. Gujral L, Sema C, Rebaudet S, Taibo CLA, Manjate AA, Piarroux R, *et al.* **Cholera epidemiology**  
4  
5 450 **in Mozambique using national surveillance data.** *J Infect Dis.* 2013 Nov 1;208 Suppl 1:S107-114.  
6  
7 451 8. Instituto Nacional de Estatística (INE). 2007. **Recenseamento Geral da População e Habitação**  
8  
9 452 **2007: Indicadores Sócio Demográficos, Província de Niassa**, p. 63.  
10  
11 453 9. Morgan, W. *et al.* (2020). **Costing oral cholera vaccine delivery using a generic oral cholera**  
12  
13 454 **vaccine delivery planning and costing tool (CholTool).** *Human Vaccines and Immunotherapeutics.*  
14  
15 455 Taylor & Francis, 16(12), pp. 3111–3118. doi: 10.1080/21645515.2020.1747930.  
16  
17 456 10. Clemens JD, Sack DA, Harris JR, Chakraborty J, Khan MR, *et al.* (1986). **Field trial of oral**  
18  
19 457 **cholera vaccines in Bangladesh.** *Lancet* 2: 124–127.  
20  
21 458 11. Clemens JD, Sack DA, Harris JR, Van Loon F, Chakraborty J, *et al.* (1990) **Field trial of oral**  
22  
23 459 **cholera vaccines in Bangladesh: Results from three-year follow-up.** *Lancet* 335: 270–273.  
24  
25 460 12. Longini IM, Nizam A, Ali M, Yunus M, Shenvi N. (2007). **Controlling endemic cholera with**  
26  
27 461 **oral vaccines.** *PLoS Med* 4: e336. doi:10.1371/journal.pmed.0040336.  
28  
29 462 13. Lucas ME, Deen JL, von Seidlein L, Wang X-Y, Ampuero J, Puri M, *et al.* **Effectiveness of mass**  
30  
31 463 **oral cholera vaccination in Beira, Mozambique.** *N Engl J Med.* 2005;352(8):757–767.  
32  
33 464 14. D. Legros, C. Paquet, W. Perea, I. Marty, N. Kenya Mugisha, H. Royer, M. Neira, & B. Ivanoff.  
34  
35 465 1999. **Mass vaccination with a two-dose oral cholera vaccine in a refugee camp in Sudan,**  
36  
37 466 **Uganda.** *Bulletin of the World Health Organization*, 77(10).  
38  
39 467 15. Emily J. Berg, Wayne A. Fuller. **Small area prediction of proportions with applications to the**  
40  
41 468 **Canadian labor force survey.** *Journal of Survey Statistics and Methodology* (2014) 2, 227–256.  
42  
43 469 16. Gavi, the Vaccine Alliance. Vaccine introduction grants and operational support  
44  
45 470 for campaigns. Report to the GAVI Alliance Board.12-13 June 2012. Available at:  
46  
47 471 [https://www.gavi.org/sites/default/files/board/minutes/2012/12-june/13%20-](https://www.gavi.org/sites/default/files/board/minutes/2012/12-june/13%20-%20Vaccine%20introduction%20grants%20and%20operation%20support%20for%20campaigns%20document.pdf)  
48  
49 472 [%20Vaccine%20introduction%20grants%20and%20operation%20support%20for%20campaigns%](https://www.gavi.org/sites/default/files/board/minutes/2012/12-june/13%20-%20Vaccine%20introduction%20grants%20and%20operation%20support%20for%20campaigns%20document.pdf)  
50  
51 473 [20document.pdf](https://www.gavi.org/sites/default/files/board/minutes/2012/12-june/13%20-%20Vaccine%20introduction%20grants%20and%20operation%20support%20for%20campaigns%20document.pdf) (Accessed on 9 February, 2021).  
52  
53  
54  
55  
56  
57  
58  
59  
60

- 1  
2  
3 474 17. Gavi, the Vaccine Alliance. GAVI Alliance Board Meeting. 12-13 June 2012, Washington, DC,  
4  
5 475 USA, Final Minutes. Available at:  
6  
7 476 [https://www.gavi.org/sites/default/files/board/minutes/2012/Board-2012-Mtg-02%20-](https://www.gavi.org/sites/default/files/board/minutes/2012/Board-2012-Mtg-02%20-%20Minutes.pdf)  
8  
9 477 [%20Minutes.pdf](https://www.gavi.org/sites/default/files/board/minutes/2012/Board-2012-Mtg-02%20-%20Minutes.pdf) (Accessed on 9 February, 2021).  
10  
11

12 478  
13  
14  
15  
16  
17  
18  
19  
20  
21  
22  
23  
24  
25  
26  
27  
28  
29  
30  
31  
32  
33  
34  
35  
36  
37  
38  
39  
40  
41  
42  
43  
44  
45  
46  
47  
48  
49  
50  
51  
52  
53  
54  
55  
56  
57  
58  
59  
60

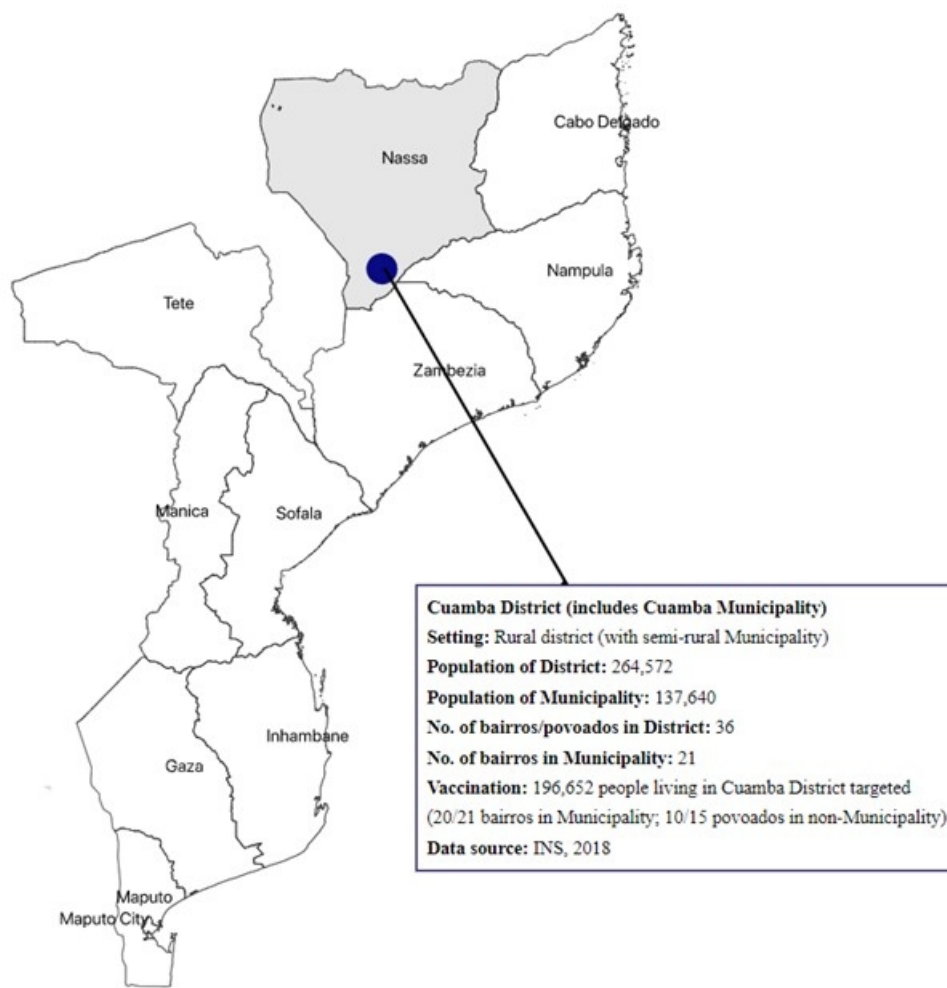

Figure 1. Pre-emptive OCV mass vaccination site

Figure 1. Pre-emptive OCV mass vaccination site

Location of the pre-emptive OCV vaccination campaign site in Cuamba District, Mozambique, included bairros and povoados in the municipality and district.

165x181mm (96 x 96 DPI)
